# Supplementary material for: Rapid Bacterial Identification, Resistance, Virulence and Type Profiling using Selected Reaction Monitoring Mass Spectrometry
Source: PubMed Central journal article supplement (PMC4563557; doi:10.1038/srep13944), 2015-09-09
Supplement: srep13944-s1.pdf [file srep13944-s1.pdf]

# Rapid Bacterial Identification, Resistance and Virulence profiling using Selected Reaction Monitoring Mass Spectrometry

Yannick Charretier, Olivier Dauwalder, Christine Franceschi, Elodie Degout-Charmette, Gilles Zambardi, Tiphaine Cecchini, Chloe Bardet, Xavier Lacoux, Philippe Dufour, Laurent Veron, Hervé Rostaing, Veronique Lanet, Tanguy Fortin, Corinne Beaulieu, Nadine Perrot, Dominique Dechaume, Sylvie Pons, Victoria Girard, Arnaud Salvador, Géraldine Durand, Frédéric Mallard, Alain Theretz, Patrick Broyer, Sonia Chatellier, Gaspard Gervasi, Marc Van Nuenen, Carolyn Ann Roitsch, Alex Van Belkum, Jérôme Lemoine, François Vandenesch, Jean-Philippe Charrier

## Supplementary Information

|                                                                                                             |    |
|-------------------------------------------------------------------------------------------------------------|----|
| <b>Supplementary Table 1: SRM method for <i>S. aureus</i> multiplexed characterisation</b> .....            | 5  |
| <b>Supplementary Table 2: Datasets characterisation using reference methods</b> .....                       | 47 |
| <b>Supplementary Table 2a: Train set characterisation</b> .....                                             | 47 |
| <b>Supplementary Table 2b: Test set characterisation</b> .....                                              | 49 |
| <b>Supplementary Table 2c: characteristics of <i>Staphylococcus aureus</i> blind evaluation set 1</b> ..... | 50 |
| <b>Supplementary Table 2d: characteristics of <i>Staphylococcus aureus</i> blind evaluation set 2</b> ..... | 52 |
| <b>Supplementary Table 2e: repeat set characterisation</b> .....                                            | 53 |
| <b>Supplementary Table 3: Results</b> .....                                                                 | 54 |
| <b>Supplementary Table 3a: Train set results</b> .....                                                      | 54 |
| <b>Supplementary Table 3b: Test set results</b> .....                                                       | 56 |
| <b>Supplementary Table 3c: Results of blind evaluation with set 1 strains</b> .....                         | 58 |

|                                                                                                                                                                                                                                                                                                                              |    |
|------------------------------------------------------------------------------------------------------------------------------------------------------------------------------------------------------------------------------------------------------------------------------------------------------------------------------|----|
| <b>Supplementary Table 3d: Results of blind evaluation with set 2 strains</b> .....                                                                                                                                                                                                                                          | 59 |
| <b>Supplementary Table 3e: Results of repeat set strains</b> .....                                                                                                                                                                                                                                                           | 60 |
| <b>Supplementary Table 4: Typing information, Staphylococcus aureus blind evaluation set 1</b> .....                                                                                                                                                                                                                         | 62 |
| <b>Supplementary Figure 1: Screenshot of Strain_067</b> , analysed in blind conditions and identified as <i>S. aureus</i> , expressing both Penicillin Binding Protein 2a (PBP2a) and Panton-Valentine Leukocidin (PVL), but neither Penicillin Binding Protein 2c (PBP2c), nor Toxic Shock Syndrome Toxin 1 (TSST-1). ..... | 63 |
| A - Extracted ion chromatogram of peptides used for identification. ....                                                                                                                                                                                                                                                     | 63 |
| B - Extracted Ion chromatogram of peptides used for Penicillin Binding Protein 2a (PBP2a) detection.....                                                                                                                                                                                                                     | 63 |
| C - Extracted Ion chromatogram of peptides used for Penicillin Binding Protein 2c (PBP2c) detection. ....                                                                                                                                                                                                                    | 64 |
| D - Extracted ion chromatogram of peptide used for Panton-Valentine Leukocidin (PVL) detection.....                                                                                                                                                                                                                          | 64 |
| E - Extracted ion chromatogram of peptide used for Toxic Shock Syndrome Toxin 1 (TSST-1) detection. ....                                                                                                                                                                                                                     | 65 |
| F - Total extracted ion chromatogram .....                                                                                                                                                                                                                                                                                   | 65 |
| <b>Supplementary Figure 2: Screenshot of Strain_080</b> , analysed in blind condition, identified as <i>S. aureus</i> , expressing neither Penicillin Binding Protein 2a (PBP2a), Penicillin Binding Protein 2c (PBP2c), Panton-Valentine Leukocidin (PVL) nor Toxic Shock Syndrom Toxin 1 (TSST-1). .....                   | 66 |
| A - Extracted ion chromatogram of peptides used for identification. ....                                                                                                                                                                                                                                                     | 66 |
| B - Extracted Ion chromatogram of peptides used for Penicillin Binding Protein 2a (PBP2a) detection.....                                                                                                                                                                                                                     | 66 |
| C - Extracted Ion chromatogram of peptides used for Penicillin Binding Protein 2c (PBP2c) detection. ....                                                                                                                                                                                                                    | 67 |
| D - Extracted ion chromatogram of peptide used for Panton-Valentine Leukocidin (PVL) detection.....                                                                                                                                                                                                                          | 67 |
| E - Extracted ion chromatogram of peptide used for Toxic Shock Syndrome Toxin 1 (TSST-1) detection. ....                                                                                                                                                                                                                     | 68 |
| F - Total extracted ion chromatogram .....                                                                                                                                                                                                                                                                                   | 68 |

**Supplementary Figure 3: Screenshot of Strain\_040**, analysed in blind conditions, and identified as *Staphylococcus hominis* and expressing neither Penicillin Binding Protein 2a (PBP2a) neither Penicillin Binding Protein 2c (PBP2c), nor Panton-Valentine Leukocidin (PVL), nor Toxic Shock Syndrome Toxin 1 (TSST-1).

.....69

A - Extracted ion chromatogram of peptides used for identification. ....69

B - Extracted Ion chromatogram of peptides used for Penicillin Binding Protein 2a (PBP2a) detection.....69

C - Extracted Ion chromatogram of peptides used for Penicillin Binding Protein 2c (PBP2c) detection. ....70

D - Extracted ion chromatogram of peptide used for Panton-Valentine Leukocidin (PVL) detection. ....70

E - Extracted ion chromatogram of peptide used for Toxic Shock Syndrome Toxin 1 (TSST-1) detection. ....71

F: Total extracted ion chromatogram.....71

**Supplementary Figure 4: Screenshot of Strain\_071**, analysed in blind conditions, and identified as *Staphylococcus aureus*, expressing Penicillin Binding Protein 2a (PBP2a) and Toxic Shock Syndrome Toxin 1 (TSST-1), but neither Penicillin Binding Protein 2c (PBP2c), nor Panton-Valentine Leukocidin (PVL). ...72

A - Extracted ion chromatogram of peptides used for identification .....72

B - Extracted Ion chromatogram of peptides used for Penicillin Binding Protein 2a (PBP2a) detection.....72

C - Extracted Ion chromatogram of peptides used for Penicillin Binding Protein 2c (PBP2c) detection. ....73

D - Extracted ion chromatogram of peptide used for Panton-Valentine Leukocidin (PVL) detection. ....73

E - Extracted ion chromatogram of peptide used for Toxic Shock Syndrome Toxin 1 (TSST-1) detection. ....74

F: - Total extracted ion chromatogram .....74

**Supplementary Figure 5: Screenshot of Strain\_078**, analysed in blind conditions, and identified as *Staphylococcus aureus*, expressing Penicillin Binding Protein 2c (PBP2c) but neither Penicillin Binding Protein 2a (PBP2a), nor Panton-Valentine Leukocidin (PVL), nor Toxic Shock Syndrome Toxin 1 (TSST-1).....75

|                                                                                                                                                        |    |
|--------------------------------------------------------------------------------------------------------------------------------------------------------|----|
| A - Extracted ion chromatogram of peptides used for identification .....                                                                               | 75 |
| B - Extracted Ion chromatogram of peptides used for Penicillin Binding Protein 2a (PBP2a) detection.....                                               | 75 |
| C - Extracted Ion chromatogram of peptides used for Penicillin Binding Protein 2c (PBP2c) detection. ....                                              | 76 |
| D - Extracted ion chromatogram of peptide used for Panton-Valentine Leukocidin (PVL) detection.....                                                    | 76 |
| E - Extracted ion chromatogram of peptide used for Toxic Shock Syndrome Toxin 1 (TSST-1) detection. ....                                               | 77 |
| F - Total extracted ion chromatogram. ....                                                                                                             | 77 |
| <b>Supplementary Figure 6:</b> Frequency distribution of the coefficient of variation from the normalised area ratios across the training set.....     | 78 |
| <b>Supplementary Figure 7:</b> feature detection in Strain_093.....                                                                                    | 79 |
| <b>Supplementary Figure 7a:</b> <i>S. aureus</i> identification based on peptide ratio conservation.....                                               | 79 |
| <b>Supplementary Figure 7b:</b> Penicillin Binding Protein 2a (PBP2a) detection based on peptide ratio conservation.....                               | 80 |
| <b>Supplementary Figure 8:</b> Slope and the Pearson product-moment correlation coefficients (r) from the linear regression across the data sets ..... | 82 |
| <b>Supplementary Figure 8a:</b> <i>S. aureus</i> identification .....                                                                                  | 82 |
| <b>Supplementary Figure 8b:</b> Penicillin Binding Protein 2c (PBP2c) detection.....                                                                   | 83 |
| <b>Supplementary Figure 8c:</b> Panton-Valentine Leukocidin (PVL) detection.....                                                                       | 83 |
| <b>References</b> .....                                                                                                                                | 85 |

**Supplementary Table 1: SRM method for *S. aureus* multiplexed characterisation**

| Feature<br>(if not<br>excluded) | Protein name<br>(from UniProt KB)       | Accession<br>number<br>(from<br>UniProt<br>KB) | Gene<br>name | Proteotypic peptide<br>sequence | Q1 -<br>Precursor<br>ion (m/z) | Q3 -<br>Fragment<br>ion (m/z) | Target<br>retention<br>time (min) | Collision<br>energy<br>(Volts) | Conserved<br><i>versus</i><br>excluded<br>transitions<br>(based on<br>train set<br>analysis) <sup>a</sup> |
|---------------------------------|-----------------------------------------|------------------------------------------------|--------------|---------------------------------|--------------------------------|-------------------------------|-----------------------------------|--------------------------------|-----------------------------------------------------------------------------------------------------------|
|                                 | Alkyl hydroperoxide reductase subunit C | P99074                                         | <i>ahpC</i>  | NFDVLDEATGLAQR                  | 774.886                        | 960.474                       | 19.40                             | 39.9                           | excluded                                                                                                  |
|                                 | Alkyl hydroperoxide reductase subunit C | P99074                                         | <i>ahpC</i>  | NFDVLDEATGLAQR                  | 774.886                        | 1073.559                      | 19.40                             | 39.9                           | excluded                                                                                                  |
|                                 | Alkyl hydroperoxide reductase subunit C | P99074                                         | <i>ahpC</i>  | NFDVLDEATGLAQR                  | 774.886                        | 1172.627                      | 19.40                             | 39.9                           | excluded                                                                                                  |
| I                               | Bifunctional autolysin                  | POC5Z8                                         | <i>atl</i>   | AYLAVPAAPK                      | 500.790                        | 653.400                       | 14.00                             | 27.0                           | conserved                                                                                                 |
| I                               | Bifunctional autolysin                  | POC5Z8                                         | <i>atl</i>   | AYLAVPAAPK                      | 500.790                        | 766.480                       | 14.00                             | 27.0                           | conserved                                                                                                 |
| I                               | Bifunctional autolysin                  | POC5Z8                                         | <i>atl</i>   | AYLAVPAAPK                      | 500.790                        | 929.550                       | 14.00                             | 27.0                           | conserved                                                                                                 |
|                                 | Bifunctional autolysin                  | POC5Z8                                         | <i>atl</i>   | AYLAVPAAPK                      | 504.790                        | 661.400                       | 14.00                             | 27.0                           | excluded                                                                                                  |
|                                 | Bifunctional autolysin                  | POC5Z8                                         | <i>atl</i>   | AYLAVPAAPK                      | 504.790                        | 774.480                       | 14.00                             | 27.0                           | excluded                                                                                                  |
|                                 | Bifunctional autolysin                  | POC5Z8                                         | <i>atl</i>   | AYLAVPAAPK                      | 504.790                        | 937.550                       | 14.00                             | 27.0                           | excluded                                                                                                  |

|   |                                          |        |              |              |         |          |       |      |           |
|---|------------------------------------------|--------|--------------|--------------|---------|----------|-------|------|-----------|
|   | Bifunctional autolysin                   | P0C5Z8 | <i>atl</i>   | DYNSPTLIGWVK | 696.862 | 913.551  | 19.60 | 35.5 | conserved |
|   | Bifunctional autolysin                   | P0C5Z8 | <i>atl</i>   | DYNSPTLIGWVK | 696.862 | 1000.583 | 19.60 | 35.5 | conserved |
|   | Bifunctional autolysin                   | P0C5Z8 | <i>atl</i>   | DYNSPTLIGWVK | 696.862 | 1114.625 | 19.60 | 35.5 | conserved |
| I | Bifunctional autolysin                   | P0C5Z8 | <i>atl</i>   | LYSVPWGTYK   | 607.320 | 751.380  | 17.40 | 32.0 | excluded  |
| I | Bifunctional autolysin                   | P0C5Z8 | <i>atl</i>   | LYSVPWGTYK   | 607.320 | 850.450  | 17.40 | 32.0 | excluded  |
| I | Bifunctional autolysin                   | P0C5Z8 | <i>atl</i>   | LYSVPWGTYK   | 607.320 | 937.480  | 17.40 | 32.0 | excluded  |
|   | Bifunctional autolysin                   | P0C5Z8 | <i>atl</i>   | LYSVPWGTYK   | 611.320 | 759.380  | 17.40 | 32.0 | excluded  |
|   | Bifunctional autolysin                   | P0C5Z8 | <i>atl</i>   | LYSVPWGTYK   | 611.320 | 858.450  | 17.40 | 32.0 | excluded  |
|   | Bifunctional autolysin                   | P0C5Z8 | <i>atl</i>   | LYSVPWGTYK   | 611.320 | 945.480  | 17.40 | 32.0 | excluded  |
|   | Virulence factor EsxA                    | Q7A7S4 | <i>esxA</i>  | FAQLLEEIK    | 545.811 | 744.450  | 18.30 | 26.8 | excluded  |
|   | Virulence factor EsxA                    | Q7A7S4 | <i>esxA</i>  | FAQLLEEIK    | 545.811 | 872.509  | 18.30 | 26.8 | excluded  |
|   | Virulence factor EsxA                    | Q7A7S4 | <i>esxA</i>  | FAQLLEEIK    | 545.811 | 943.546  | 18.30 | 26.8 | excluded  |
| I | Virulence factor EsxA                    | Q7A7S4 | <i>esxA</i>  | SQSYGQGSDQIR | 663.308 | 860.422  | 8.80  | 33.5 | conserved |
| I | Virulence factor EsxA                    | Q7A7S4 | <i>esxA</i>  | SQSYGQGSDQIR | 663.308 | 1023.485 | 8.80  | 33.5 | conserved |
| I | Virulence factor EsxA                    | Q7A7S4 | <i>esxA</i>  | SQSYGQGSDQIR | 663.308 | 1110.517 | 8.80  | 33.5 | conserved |
|   | Glyceraldehyde-3-phosphate dehydrogenase | P0A038 | <i>gapA1</i> | TLAYLAELSK   | 554.816 | 823.456  | 17.80 | 27.4 | excluded  |

1

|                                            |        |              |              |         |          |       |      |          |
|--------------------------------------------|--------|--------------|--------------|---------|----------|-------|------|----------|
| Glyceraldehyde-3-phosphate dehydrogenase 1 | P0A038 | <i>gapA1</i> | TLAYLAELSK   | 554.816 | 894.493  | 17.80 | 27.4 | excluded |
| Glyceraldehyde-3-phosphate dehydrogenase 1 | P0A038 | <i>gapA1</i> | TLAYLAELSK   | 554.816 | 1007.577 | 17.80 | 27.4 | excluded |
| Dihydrolipoyl dehydrogenase                | P0A0E8 | <i>pdhD</i>  | ALSLDDTNGFVK | 640.330 | 780.389  | 16.30 | 32.2 | excluded |
| Dihydrolipoyl dehydrogenase                | P0A0E8 | <i>pdhD</i>  | ALSLDDTNGFVK | 640.330 | 895.416  | 16.30 | 32.2 | excluded |
| Dihydrolipoyl dehydrogenase                | P0A0E8 | <i>pdhD</i>  | ALSLDDTNGFVK | 640.330 | 1008.500 | 16.30 | 32.2 | excluded |
| Surface protein                            | P80544 | <i>pls</i>   | ATTDDLIGDK   | 524.761 | 775.383  | 11.84 | 25.6 | excluded |
| Surface protein                            | P80544 | <i>pls</i>   | ATTDDLIGDK   | 524.761 | 876.431  | 11.84 | 25.6 | excluded |
| Surface protein                            | P80544 | <i>pls</i>   | ATTDDLIGDK   | 524.761 | 977.479  | 11.84 | 25.6 | excluded |
| Surface protein                            | P80544 | <i>pls</i>   | EEIPFEK      | 446.227 | 520.277  | 13.70 | 21.2 | excluded |
| Surface protein                            | P80544 | <i>pls</i>   | EEIPFEK      | 446.227 | 633.361  | 13.70 | 21.2 | excluded |
| Surface protein                            | P80544 | <i>pls</i>   | EEIPFEK      | 446.227 | 762.403  | 13.70 | 21.2 | excluded |
| Surface protein                            | P80544 | <i>pls</i>   | EFNPDLKPGEEK | 701.846 | 800.451  | 12.03 | 35.7 | excluded |
| Surface protein                            | P80544 | <i>pls</i>   | EFNPDLKPGEEK | 701.846 | 915.478  | 12.03 | 35.7 | excluded |

|                           |        |             |                 |         |          |       |      |          |
|---------------------------|--------|-------------|-----------------|---------|----------|-------|------|----------|
| Surface protein           | P80544 | <i>pls</i>  | EFNPDLKPGEEK    | 701.846 | 1012.531 | 12.03 | 35.7 | excluded |
| Surface protein           | P80544 | <i>pls</i>  | TQVVDTVAK       | 480.772 | 632.361  | 10.26 | 23.1 | excluded |
| Surface protein           | P80544 | <i>pls</i>  | TQVVDTVAK       | 480.772 | 731.430  | 10.26 | 23.1 | excluded |
| Surface protein           | P80544 | <i>pls</i>  | TQVVDTVAK       | 480.772 | 859.488  | 10.26 | 23.1 | excluded |
| Surface protein           | P80544 | <i>pls</i>  | TTTTPTTINPLTGEK | 787.917 | 871.488  | 14.82 | 40.6 | excluded |
| Surface protein           | P80544 | <i>pls</i>  | TTTTPTTINPLTGEK | 787.917 | 972.536  | 14.82 | 40.6 | excluded |
| Surface protein           | P80544 | <i>pls</i>  | TTTTPTTINPLTGEK | 787.917 | 1073.584 | 14.82 | 40.6 | excluded |
| Surface protein           | P80544 | <i>pls</i>  | VGYGTFVK        | 435.740 | 551.319  | 13.61 | 20.6 | excluded |
| Surface protein           | P80544 | <i>pls</i>  | VGYGTFVK        | 435.740 | 714.382  | 13.61 | 20.6 | excluded |
| Surface protein           | P80544 | <i>pls</i>  | VGYGTFVK        | 435.740 | 771.404  | 13.61 | 20.6 | excluded |
| 50S ribosomal protein L6  | Q7A466 | <i>rplF</i> | VLELVGVGYR      | 552.824 | 763.446  | 17.40 | 27.2 | excluded |
| 50S ribosomal protein L6  | Q7A466 | <i>rplF</i> | VLELVGVGYR      | 552.824 | 892.489  | 17.40 | 27.2 | excluded |
| 50S ribosomal protein L6  | Q7A466 | <i>rplF</i> | VLELVGVGYR      | 552.824 | 1005.573 | 17.40 | 27.2 | excluded |
| 50S ribosomal protein L17 | Q7A469 | <i>rplQ</i> | DLATSLIISER     | 609.340 | 817.480  | 18.40 | 32.0 | excluded |
| 50S ribosomal protein L17 | Q7A469 | <i>rplQ</i> | DLATSLIISER     | 609.340 | 918.530  | 18.40 | 32.0 | excluded |
| 50S ribosomal protein L17 | Q7A469 | <i>rplQ</i> | DLATSLIISER     | 609.340 | 989.560  | 18.40 | 32.0 | excluded |
| 50S ribosomal protein L17 | Q7A469 | <i>rplQ</i> | DLATSLIISER     | 614.340 | 827.480  | 18.40 | 32.0 | excluded |



|   |                                        |        |              |               |         |          |       |      |           |
|---|----------------------------------------|--------|--------------|---------------|---------|----------|-------|------|-----------|
|   | 50S ribosomal protein L17              | Q7A469 | <i>rplQ</i>  | DLATSLIISER   | 614.340 | 928.530  | 18.40 | 32.0 | excluded  |
|   | 50S ribosomal protein L17              | Q7A469 | <i>rplQ</i>  | DLATSLIISER   | 614.340 | 999.560  | 18.40 | 32.0 | excluded  |
| I | 50S ribosomal protein L20              | P66108 | <i>rplT</i>  | AFAQLVTK      | 439.261 | 588.372  | 13.50 | 20.8 | conserved |
| I | 50S ribosomal protein L20              | P66108 | <i>rplT</i>  | AFAQLVTK      | 439.261 | 659.409  | 13.50 | 20.8 | conserved |
| I | 50S ribosomal protein L20              | P66108 | <i>rplT</i>  | AFAQLVTK      | 439.261 | 806.477  | 13.50 | 20.8 | conserved |
|   | 30S ribosomal protein S9               | P66646 | <i>rpsI</i>  | LVPGEGNITVNNR | 691.873 | 887.469  | 12.40 | 35.2 | excluded  |
|   | 30S ribosomal protein S9               | P66646 | <i>rpsI</i>  | LVPGEGNITVNNR | 691.873 | 1016.512 | 12.40 | 35.2 | excluded  |
|   | 30S ribosomal protein S9               | P66646 | <i>rpsI</i>  | LVPGEGNITVNNR | 691.873 | 1073.533 | 12.40 | 35.2 | excluded  |
|   | 30S ribosomal protein S20              | Q7A5C0 | <i>rpsT</i>  | AAQSNLIHSNK   | 591.815 | 825.458  | 8.00  | 29.5 | excluded  |
|   | 30S ribosomal protein S20              | Q7A5C0 | <i>rpsT</i>  | AAQSNLIHSNK   | 591.815 | 912.490  | 8.00  | 29.5 | excluded  |
|   | 30S ribosomal protein S20              | Q7A5C0 | <i>rpsT</i>  | AAQSNLIHSNK   | 591.815 | 1040.548 | 8.00  | 29.5 | excluded  |
| I | Staphylococcal secretory antigen ssaA2 | Q7A423 | <i>ssaA2</i> | AGYTVNNTPK    | 532.770 | 672.370  | 8.80  | 28.0 | conserved |
| I | Staphylococcal secretory antigen ssaA2 | Q7A423 | <i>ssaA2</i> | AGYTVNNTPK    | 532.770 | 773.420  | 8.80  | 28.0 | conserved |
| I | Staphylococcal secretory antigen ssaA2 | Q7A423 | <i>ssaA2</i> | AGYTVNNTPK    | 532.770 | 936.480  | 8.80  | 28.0 | conserved |
|   | Staphylococcal secretory antigen ssaA2 | Q7A423 | <i>ssaA2</i> | AGYTVNNTPK    | 536.770 | 680.370  | 8.80  | 28.0 | excluded  |

|   |                                        |        |              |               |         |          |       |      |           |
|---|----------------------------------------|--------|--------------|---------------|---------|----------|-------|------|-----------|
|   | Staphylococcal secretory antigen ssaA2 | Q7A423 | <i>ssaA2</i> | AGYTVNNTPK    | 536.770 | 781.420  | 8.80  | 28.0 | excluded  |
|   | Staphylococcal secretory antigen ssaA2 | Q7A423 | <i>ssaA2</i> | AGYTVNNTPK    | 536.770 | 944.480  | 8.80  | 28.0 | excluded  |
| I | Staphylococcal secretory antigen ssaA2 | Q7A423 | <i>ssaA2</i> | SISSGYTSGR    | 507.750 | 640.300  | 8.60  | 27.0 | conserved |
| I | Staphylococcal secretory antigen ssaA2 | Q7A423 | <i>ssaA2</i> | SISSGYTSGR    | 507.750 | 727.340  | 8.60  | 27.0 | conserved |
| I | Staphylococcal secretory antigen ssaA2 | Q7A423 | <i>ssaA2</i> | SISSGYTSGR    | 507.750 | 814.370  | 8.60  | 27.0 | conserved |
|   | Staphylococcal secretory antigen ssaA2 | Q7A423 | <i>ssaA2</i> | SISSGYTSGR    | 512.750 | 650.300  | 8.60  | 27.0 | excluded  |
|   | Staphylococcal secretory antigen ssaA2 | Q7A423 | <i>ssaA2</i> | SISSGYTSGR    | 512.750 | 737.340  | 8.60  | 27.0 | excluded  |
|   | Staphylococcal secretory antigen ssaA2 | Q7A423 | <i>ssaA2</i> | SISSGYTSGR    | 512.750 | 824.370  | 8.60  | 27.0 | excluded  |
| I | Triosephosphate isomerase              | P68823 | <i>tpiA</i>  | DFVNALPTLPDSK | 708.872 | 870.493  | 18.60 | 36.1 | conserved |
| I | Triosephosphate isomerase              | P68823 | <i>tpiA</i>  | DFVNALPTLPDSK | 708.872 | 941.530  | 18.60 | 36.1 | conserved |
| I | Triosephosphate isomerase              | P68823 | <i>tpiA</i>  | DFVNALPTLPDSK | 708.872 | 1055.573 | 18.60 | 36.1 | conserved |

|                        |        |             |              |         |          |       |      |          |
|------------------------|--------|-------------|--------------|---------|----------|-------|------|----------|
| Thioredoxin            | P0A0K6 | <i>trxA</i> | VTDADFDSK    | 499.227 | 682.304  | 9.20  | 24.2 | excluded |
| Thioredoxin            | P0A0K6 | <i>trxA</i> | VTDADFDSK    | 499.227 | 797.331  | 9.20  | 24.2 | excluded |
| Thioredoxin            | P0A0K6 | <i>trxA</i> | VTDADFDSK    | 499.227 | 898.379  | 9.20  | 24.2 | excluded |
| Elongation factor Ts   | P99171 | <i>Tsf</i>  | NPDVTVEAFLK  | 616.830 | 807.461  | 18.60 | 30.9 | excluded |
| Elongation factor Ts   | P99171 | <i>tsf</i>  | NPDVTVEAFLK  | 616.830 | 906.529  | 18.60 | 30.9 | excluded |
| Elongation factor Ts   | P99171 | <i>tsf</i>  | NPDVTVEAFLK  | 616.830 | 1021.556 | 18.60 | 30.9 | excluded |
| Elongation factor Tu   | P99152 | <i>tuf</i>  | TVGSGVVTEIHK | 601.850 | 801.510  | 16.80 | 31.0 | excluded |
| Elongation factor Tu   | P99152 | <i>tuf</i>  | TVGSGVVTEIHK | 601.850 | 858.530  | 16.80 | 31.0 | excluded |
| Elongation factor Tu   | P99152 | <i>tuf</i>  | TVGSGVVTEIHK | 601.850 | 945.560  | 16.80 | 31.0 | excluded |
| Elongation factor Tu   | P99152 | <i>tuf</i>  | TVGSGVVTEIHK | 605.850 | 809.510  | 16.80 | 31.0 | excluded |
| Elongation factor Tu   | P99152 | <i>tuf</i>  | TVGSGVVTEIHK | 605.850 | 866.530  | 16.80 | 31.0 | excluded |
| Elongation factor Tu   | P99152 | <i>tuf</i>  | TVGSGVVTEIHK | 605.850 | 953.560  | 16.80 | 31.0 | excluded |
| UPF0337 protein SA0772 | Q7A6L9 | SA0772      | ADESKFEQAK   | 576.780 | 837.446  | 7.50  | 28.6 | excluded |
| UPF0337 protein SA0772 | Q7A6L9 | SA0772      | ADESKFEQAK   | 576.780 | 966.489  | 7.50  | 28.6 | excluded |
| UPF0337 protein SA0772 | Q7A6L9 | SA0772      | ADESKFEQAK   | 576.780 | 1081.516 | 7.50  | 28.6 | excluded |
| UPF0337 protein SA0772 | Q7A6L9 | SA0772      | AKEFVENAK    | 518.277 | 707.372  | 8.00  | 25.3 | excluded |
| UPF0337 protein SA0772 | Q7A6L9 | SA0772      | AKEFVENAK    | 518.277 | 836.415  | 8.00  | 25.3 | excluded |

|                                          |        |        |              |         |          |       |      |          |
|------------------------------------------|--------|--------|--------------|---------|----------|-------|------|----------|
| UPF0337 protein SA0772                   | Q7A6L9 | SA0772 | AKEFVENAK    | 518.277 | 964.510  | 8.00  | 25.3 | excluded |
| UPF0337 protein SA0772                   | Q7A6L9 | SA0772 | ATDFIDKVK    | 518.790 | 749.460  | 12.30 | 28.0 | excluded |
| UPF0337 protein SA0772                   | Q7A6L9 | SA0772 | ATDFIDKVK    | 518.790 | 864.480  | 12.30 | 28.0 | excluded |
| UPF0337 protein SA0772                   | Q7A6L9 | SA0772 | ATDFIDKVK    | 518.790 | 965.530  | 12.30 | 28.0 | excluded |
| UPF0337 protein SA0772                   | Q7A6L9 | SA0772 | ATDFIDKVK    | 522.790 | 757.460  | 12.30 | 28.0 | excluded |
| UPF0337 protein SA0772                   | Q7A6L9 | SA0772 | ATDFIDKVK    | 522.790 | 872.480  | 12.30 | 28.0 | excluded |
| UPF0337 protein SA0772                   | Q7A6L9 | SA0772 | ATDFIDKVK    | 522.790 | 973.530  | 12.30 | 28.0 | excluded |
| UPF0337 protein SA0772                   | Q7A6L9 | SA0772 | EFVENAKEK    | 547.280 | 718.370  | 7.90  | 29.0 | excluded |
| UPF0337 protein SA0772                   | Q7A6L9 | SA0772 | EFVENAKEK    | 547.280 | 817.440  | 7.90  | 29.0 | excluded |
| UPF0337 protein SA0772                   | Q7A6L9 | SA0772 | EFVENAKEK    | 547.280 | 964.510  | 7.90  | 29.0 | excluded |
| UPF0337 protein SA0772                   | Q7A6L9 | SA0772 | EFVENAKEK    | 551.280 | 726.370  | 7.90  | 29.0 | excluded |
| UPF0337 protein SA0772                   | Q7A6L9 | SA0772 | EFVENAKEK    | 551.280 | 825.440  | 7.90  | 29.0 | excluded |
| UPF0337 protein SA0772                   | Q7A6L9 | SA0772 | EFVENAKEK    | 551.280 | 972.510  | 7.90  | 29.0 | excluded |
| Putative universal stress protein SA1532 | Q7A551 | SA1532 | FIVGSVSESIVR | 646.864 | 876.479  | 17.40 | 32.6 | excluded |
| Putative universal stress protein SA1532 | Q7A551 | SA1532 | FIVGSVSESIVR | 646.864 | 933.500  | 17.40 | 32.6 | excluded |
| Putative universal stress protein SA1532 | Q7A551 | SA1532 | FIVGSVSESIVR | 646.864 | 1032.568 | 17.40 | 32.6 | excluded |

|   |                               |        |                          |               |         |          |       |      |           |
|---|-------------------------------|--------|--------------------------|---------------|---------|----------|-------|------|-----------|
| I | Probable tautomerase SA1195.1 | P99132 | SAS044                   | NLVSEVTDAVEK  | 652.341 | 890.447  | 18.90 | 32.9 | conserved |
| I | Probable tautomerase SA1195.1 | P99132 | SAS044                   | NLVSEVTDAVEK  | 652.341 | 977.479  | 18.90 | 32.9 | conserved |
| I | Probable tautomerase SA1195.1 | P99132 | SAS044                   | NLVSEVTDAVEK  | 652.341 | 1076.547 | 18.90 | 32.9 | conserved |
|   | UPF0457 protein SA1975.1      | Q99S93 | SAS074                   | LDSKDVS       | 460.250 | 604.340  | 7.14  | 25.0 | excluded  |
|   | UPF0457 protein SA1975.1      | Q99S93 | SAS074                   | LDSKDVS       | 460.250 | 691.370  | 7.14  | 25.0 | excluded  |
|   | UPF0457 protein SA1975.1      | Q99S93 | SAS074                   | LDSKDVS       | 460.250 | 806.400  | 7.14  | 25.0 | excluded  |
|   | UPF0457 protein SA1975.1      | Q99S93 | SAS074                   | LDSKDVS       | 465.250 | 614.340  | 7.14  | 25.0 | excluded  |
|   | UPF0457 protein SA1975.1      | Q99S93 | SAS074                   | LDSKDVS       | 465.250 | 701.370  | 7.14  | 25.0 | excluded  |
|   | UPF0457 protein SA1975.1      | Q99S93 | SAS074                   | LDSKDVS       | 465.250 | 816.400  | 7.14  | 25.0 | excluded  |
| I | UPF0457 protein SA1975.1      | Q99S93 | SAS074                   | NITQDQDIHAVPK | 739.880 | 664.410  | 10.90 | 38.0 | conserved |
| I | UPF0457 protein SA1975.1      | Q99S93 | SAS074                   | NITQDQDIHAVPK | 739.880 | 779.440  | 10.90 | 38.0 | conserved |
| I | UPF0457 protein SA1975.1      | Q99S93 | SAS074                   | NITQDQDIHAVPK | 739.880 | 907.500  | 10.90 | 38.0 | conserved |
|   | UPF0457 protein SA1975.1      | Q99S93 | SAS074                   | NITQDQDIHAVPK | 743.880 | 672.410  | 10.90 | 38.0 | excluded  |
|   | UPF0457 protein SA1975.1      | Q99S93 | SAS074                   | NITQDQDIHAVPK | 743.880 | 787.440  | 10.90 | 38.0 | excluded  |
|   | UPF0457 protein SA1975.1      | Q99S93 | SAS074                   | NITQDQDIHAVPK | 743.880 | 915.500  | 10.90 | 38.0 | excluded  |
| R | Penicillin binding protein 2  | Q7A8C6 | <i>mecA</i> <sup>C</sup> | DINIQR        | 437.220 | 418.220  | 10.30 | 24.0 | conserved |

|   |                                                 |        |                          |          |         |         |       |      |           |
|---|-------------------------------------------------|--------|--------------------------|----------|---------|---------|-------|------|-----------|
|   | prime <sup>b</sup>                              |        |                          |          |         |         |       |      |           |
| R | Penicillin binding protein 2 prime <sup>b</sup> | Q7A8C6 | <i>mecA</i> <sup>c</sup> | DINIQR   | 437.220 | 531.300 | 10.30 | 24.0 | conserved |
| R | Penicillin binding protein 2 prime <sup>b</sup> | Q7A8C6 | <i>mecA</i> <sup>c</sup> | DINIQR   | 437.220 | 645.330 | 10.30 | 24.0 | conserved |
|   | Penicillin binding protein 2 prime <sup>b</sup> | Q7A8C6 | <i>mecA</i> <sup>c</sup> | DINIQR   | 442.220 | 428.220 | 10.30 | 24.0 | excluded  |
|   | Penicillin binding protein 2 prime <sup>b</sup> | Q7A8C6 | <i>mecA</i> <sup>c</sup> | DINIQR   | 442.220 | 541.300 | 10.30 | 24.0 | excluded  |
|   | Penicillin binding protein 2 prime <sup>b</sup> | Q7A8C6 | <i>mecA</i> <sup>c</sup> | DINIQR   | 442.220 | 655.330 | 10.30 | 24.0 | excluded  |
| R | Penicillin binding protein 2 prime <sup>b</sup> | Q7A8C6 | <i>mecA</i> <sup>c</sup> | IYNSLGVK | 447.260 | 503.300 | 11.70 | 25.0 | conserved |
| R | Penicillin binding protein 2 prime <sup>b</sup> | Q7A8C6 | <i>mecA</i> <sup>c</sup> | IYNSLGVK | 447.260 | 617.360 | 11.70 | 25.0 | conserved |
| R | Penicillin binding protein 2 prime <sup>b</sup> | Q7A8C6 | <i>mecA</i> <sup>c</sup> | IYNSLGVK | 447.260 | 780.430 | 11.70 | 25.0 | conserved |
|   | Penicillin binding protein 2 prime <sup>b</sup> | Q7A8C6 | <i>mecA</i> <sup>c</sup> | IYNSLGVK | 451.260 | 511.300 | 11.70 | 25.0 | excluded  |
|   | Penicillin binding protein 2 prime <sup>b</sup> | Q7A8C6 | <i>mecA</i> <sup>c</sup> | IYNSLGVK | 451.260 | 625.360 | 11.70 | 25.0 | excluded  |

|   |                                                 |        |                          |             |         |         |       |      |           |
|---|-------------------------------------------------|--------|--------------------------|-------------|---------|---------|-------|------|-----------|
|   | Penicillin binding protein 2 prime <sup>b</sup> | Q7A8C6 | <i>mecA</i> <sup>c</sup> | IYNSLGVK    | 451.260 | 788.430 | 11.70 | 25.0 | excluded  |
| R | Penicillin binding protein 2 prime <sup>b</sup> | Q7A8C6 | <i>mecA</i> <sup>c</sup> | ILTAMIGLNNK | 594.340 | 789.430 | 17.30 | 31.0 | conserved |
| R | Penicillin binding protein 2 prime <sup>b</sup> | Q7A8C6 | <i>mecA</i> <sup>c</sup> | ILTAMIGLNNK | 594.340 | 860.470 | 17.30 | 31.0 | conserved |
| R | Penicillin binding protein 2 prime <sup>b</sup> | Q7A8C6 | <i>mecA</i> <sup>c</sup> | ILTAMIGLNNK | 594.340 | 961.510 | 17.30 | 31.0 | conserved |
|   | Penicillin binding protein 2 prime <sup>b</sup> | Q7A8C6 | <i>mecA</i> <sup>c</sup> | ILTAMIGLNNK | 598.340 | 797.430 | 17.30 | 31.0 | excluded  |
|   | Penicillin binding protein 2 prime <sup>b</sup> | Q7A8C6 | <i>mecA</i> <sup>c</sup> | ILTAMIGLNNK | 598.340 | 868.470 | 17.30 | 31.0 | excluded  |
|   | Penicillin binding protein 2 prime <sup>b</sup> | Q7A8C6 | <i>mecA</i> <sup>c</sup> | ILTAMIGLNNK | 598.340 | 969.510 | 17.30 | 31.0 | excluded  |
| R | Penicillin binding protein 2 prime <sup>b</sup> | Q7A8C6 | <i>mecA</i> <sup>c</sup> | ELSISEDYIK  | 598.810 | 754.360 | 15.80 | 31.0 | conserved |
| R | Penicillin binding protein 2 prime <sup>b</sup> | Q7A8C6 | <i>mecA</i> <sup>c</sup> | ELSISEDYIK  | 598.810 | 867.450 | 15.80 | 31.0 | conserved |
| R | Penicillin binding protein 2 prime <sup>b</sup> | Q7A8C6 | <i>mecA</i> <sup>c</sup> | ELSISEDYIK  | 598.810 | 954.480 | 15.80 | 31.0 | conserved |
|   | Penicillin binding protein 2 prime <sup>b</sup> | Q7A8C6 | <i>mecA</i> <sup>c</sup> | ELSISEDYIK  | 602.810 | 762.360 | 15.80 | 31.0 | excluded  |

|   |                                                 |        |                          |             |         |         |       |      |                        |
|---|-------------------------------------------------|--------|--------------------------|-------------|---------|---------|-------|------|------------------------|
|   | Penicillin binding protein 2 prime <sup>b</sup> | Q7A8C6 | <i>mecA</i> <sup>c</sup> | ELISEDYIK   | 602.810 | 875.450 | 15.80 | 31.0 | excluded               |
|   | Penicillin binding protein 2 prime <sup>b</sup> | Q7A8C6 | <i>mecA</i> <sup>c</sup> | ELISEDYIK   | 602.810 | 962.480 | 15.80 | 31.0 | excluded               |
| R | Penicillin binding protein 2 prime <sup>b</sup> | Q7A8C6 | <i>mecA</i> <sup>c</sup> | FQITTPGSTQK | 647.840 | 617.300 | 12.20 | 26.0 | conserved <sup>e</sup> |
| R | Penicillin binding protein 2 prime <sup>b</sup> | Q7A8C6 | <i>mecA</i> <sup>c</sup> | FQITTPGSTQK | 647.840 | 704.400 | 12.20 | 34.0 | conserved <sup>e</sup> |
| R | Penicillin binding protein 2 prime <sup>b</sup> | Q7A8C6 | <i>mecA</i> <sup>c</sup> | FQITTPGSTQK | 647.840 | 906.450 | 12.20 | 34.0 | conserved <sup>e</sup> |
|   | Penicillin binding protein 2 prime <sup>b</sup> | Q7A8C6 | <i>mecA</i> <sup>c</sup> | FQITTPGSTQK | 651.840 | 625.300 | 12.20 | 26.0 | excluded               |
|   | Penicillin binding protein 2 prime <sup>b</sup> | Q7A8C6 | <i>mecA</i> <sup>c</sup> | FQITTPGSTQK | 651.840 | 712.400 | 12.20 | 34.0 | excluded               |
|   | Penicillin binding protein 2 prime <sup>b</sup> | Q7A8C6 | <i>mecA</i> <sup>c</sup> | FQITTPGSTQK | 651.840 | 914.450 | 12.20 | 34.0 | excluded               |
| R | Penicillin binding protein 2 prime <sup>b</sup> | Q7A8C6 | <i>mecA</i> <sup>c</sup> | SYANLIGK    | 433.240 | 544.300 | 13.00 | 24.0 | conserved              |
|   | Penicillin binding protein 2 prime <sup>b</sup> | Q7A8C6 | <i>mecA</i> <sup>c</sup> | SYANLIGK    | 437.240 | 552.300 | 13.00 | 24.0 | excluded               |
| R | Penicillin binding protein 2 prime <sup>b</sup> | Q7A8C6 | <i>mecA</i> <sup>c</sup> | SYANLIGK    | 433.240 | 615.380 | 13.00 | 24.0 | conserved              |



|   |                                                 |        |                          |             |         |         |       |      |           |
|---|-------------------------------------------------|--------|--------------------------|-------------|---------|---------|-------|------|-----------|
|   | Penicillin binding protein 2 prime <sup>b</sup> | Q7A8C6 | <i>mecA</i> <sup>c</sup> | SYANLIGK    | 437.240 | 623.380 | 13.00 | 24.0 | excluded  |
| R | Penicillin binding protein 2 prime <sup>b</sup> | Q7A8C6 | <i>mecA</i> <sup>c</sup> | SYANLIGK    | 433.240 | 778.450 | 13.00 | 24.0 | conserved |
|   | Penicillin binding protein 2 prime <sup>b</sup> | Q7A8C6 | <i>mecA</i> <sup>c</sup> | SYANLIGK    | 437.240 | 786.450 | 13.00 | 24.0 | excluded  |
| R | Penicillin binding protein 2 prime <sup>b</sup> | Q7A8C6 | <i>mecA</i> <sup>c</sup> | VALELGSK    | 408.740 | 533.290 | 12.70 | 23.0 | conserved |
|   | Penicillin binding protein 2 prime <sup>b</sup> | Q7A8C6 | <i>mecA</i> <sup>c</sup> | VALELGSK    | 412.740 | 541.290 | 12.70 | 23.0 | excluded  |
| R | Penicillin binding protein 2 prime <sup>b</sup> | Q7A8C6 | <i>mecA</i> <sup>c</sup> | VALELGSK    | 408.740 | 646.380 | 12.70 | 23.0 | conserved |
|   | Penicillin binding protein 2 prime <sup>b</sup> | Q7A8C6 | <i>mecA</i> <sup>c</sup> | VALELGSK    | 412.740 | 654.380 | 12.70 | 23.0 | excluded  |
| R | Penicillin binding protein 2 prime <sup>b</sup> | Q7A8C6 | <i>mecA</i> <sup>c</sup> | VALELGSK    | 408.740 | 717.410 | 12.70 | 23.0 | conserved |
|   | Penicillin binding protein 2 prime <sup>b</sup> | Q7A8C6 | <i>mecA</i> <sup>c</sup> | VALELGSK    | 412.740 | 725.410 | 12.70 | 23.0 | excluded  |
| R | Penicillin binding protein 2 prime <sup>b</sup> | Q7A8C6 | <i>mecA</i> <sup>c</sup> | YEVVNGNIDLK | 632.330 | 773.420 | 14.65 | 33.0 | conserved |
|   | Penicillin binding protein 2 prime <sup>b</sup> | Q7A8C6 | <i>mecA</i> <sup>c</sup> | YEVVNGNIDLK | 636.330 | 781.420 | 14.65 | 33.0 | excluded  |

|   |                                                               |        |                          |              |         |         |       |      |                        |
|---|---------------------------------------------------------------|--------|--------------------------|--------------|---------|---------|-------|------|------------------------|
| R | Penicillin binding protein 2 prime <sup>b</sup>               | Q7A8C6 | <i>mecA</i> <sup>c</sup> | YEVVNGNIDLK  | 632.330 | 872.480 | 14.65 | 33.0 | conserved              |
|   | Penicillin binding protein 2 prime <sup>b</sup>               | Q7A8C6 | <i>mecA</i> <sup>c</sup> | YEVVNGNIDLK  | 636.330 | 880.480 | 14.65 | 33.0 | excluded               |
| R | Penicillin binding protein 2 prime <sup>b</sup>               | Q7A8C6 | <i>mecA</i> <sup>c</sup> | YEVVNGNIDLK  | 632.330 | 971.550 | 14.65 | 33.0 | conserved              |
|   | Penicillin binding protein 2 prime <sup>b</sup>               | Q7A8C6 | <i>mecA</i> <sup>c</sup> | YEVVNGNIDLK  | 636.330 | 979.550 | 14.65 | 33.0 | excluded               |
| R | Beta-lactam-inducible penicillin-binding protein <sup>d</sup> | G0LPN8 | <i>mecC</i> <sup>c</sup> | FQITTSFGSTQK | 647.840 | 617.330 | 12.30 | 26.0 | conserved <sup>e</sup> |
| R | Beta-lactam-inducible penicillin-binding protein <sup>d</sup> | G0LPN8 | <i>mecC</i> <sup>c</sup> | FQITTSFGSTQK | 647.840 | 805.410 | 12.30 | 34.0 | conserved <sup>e</sup> |
| R | Beta-lactam-inducible penicillin-binding protein <sup>d</sup> | G0LPN8 | <i>mecC</i> <sup>c</sup> | FQITTSFGSTQK | 647.840 | 906.450 | 12.30 | 34.0 | conserved <sup>e</sup> |
| R | Beta-lactam-inducible penicillin-binding protein <sup>d</sup> | G0LPN8 | <i>mecC</i> <sup>c</sup> | IALALGAK     | 378.750 | 459.290 | 14.10 | 22.0 | conserved              |
| R | Beta-lactam-inducible penicillin-binding protein <sup>d</sup> | G0LPN8 | <i>mecC</i> <sup>c</sup> | IALALGAK     | 378.750 | 572.380 | 14.10 | 22.0 | conserved              |
| R | Beta-lactam-inducible penicillin-binding protein <sup>d</sup> | G0LPN8 | <i>mecC</i> <sup>c</sup> | IALALGAK     | 378.750 | 643.410 | 14.10 | 22.0 | conserved              |
| R | Beta-lactam-inducible penicillin-binding protein <sup>d</sup> | G0LPN8 | <i>mecC</i> <sup>c</sup> | ILTSIIALK    | 486.330 | 644.430 | 18.80 | 26.0 | conserved              |

|   |                                                               |        |                          |              |         |          |       |      |           |
|---|---------------------------------------------------------------|--------|--------------------------|--------------|---------|----------|-------|------|-----------|
| R | Beta-lactam-inducible penicillin-binding protein <sup>d</sup> | GOLPN8 | <i>mecC</i> <sup>c</sup> | ILTSIIALK    | 486.330 | 745.480  | 18.80 | 26.0 | conserved |
| R | Beta-lactam-inducible penicillin-binding protein <sup>d</sup> | GOLPN8 | <i>mecC</i> <sup>c</sup> | ILTSIIALK    | 486.330 | 858.570  | 18.80 | 26.0 | conserved |
|   | Beta-lactam-inducible penicillin-binding protein <sup>d</sup> | GOLPN8 | <i>mecC</i> <sup>c</sup> | INIETLK      | 415.750 | 490.290  | 13.65 | 23.0 | excluded  |
|   | Beta-lactam-inducible penicillin-binding protein <sup>d</sup> | GOLPN8 | <i>mecC</i> <sup>c</sup> | INIETLK      | 415.750 | 603.370  | 13.65 | 23.0 | excluded  |
|   | Beta-lactam-inducible penicillin-binding protein <sup>d</sup> | GOLPN8 | <i>mecC</i> <sup>c</sup> | INIETLK      | 415.750 | 717.410  | 13.65 | 23.0 | excluded  |
| R | Beta-lactam-inducible penicillin-binding protein <sup>d</sup> | GOLPN8 | <i>mecC</i> <sup>c</sup> | LAYGEEEIVDR  | 647.320 | 760.380  | 13.50 | 33.0 | conserved |
| R | Beta-lactam-inducible penicillin-binding protein <sup>d</sup> | GOLPN8 | <i>mecC</i> <sup>c</sup> | LAYGEEEIVDR  | 647.320 | 946.450  | 13.50 | 33.0 | conserved |
| R | Beta-lactam-inducible penicillin-binding protein <sup>d</sup> | GOLPN8 | <i>mecC</i> <sup>c</sup> | LAYGEEEIVDR  | 647.320 | 1109.510 | 13.50 | 33.0 | conserved |
|   | Beta-lactam-inducible penicillin-binding protein <sup>d</sup> | GOLPN8 | <i>mecC</i> <sup>c</sup> | NNPNMLMAINVK | 679.850 | 565.810  | 17.97 | 35.0 | excluded  |
|   | Beta-lactam-inducible penicillin-binding protein <sup>d</sup> | GOLPN8 | <i>mecC</i> <sup>c</sup> | NNPNMLMAINVK | 679.850 | 919.510  | 17.97 | 35.0 | excluded  |
|   | Beta-lactam-inducible penicillin-binding protein <sup>d</sup> | GOLPN8 | <i>mecC</i> <sup>c</sup> | NNPNMLMAINVK | 679.850 | 1130.610 | 17.97 | 35.0 | excluded  |

|   |                                                               |        |                          |              |         |         |       |      |           |
|---|---------------------------------------------------------------|--------|--------------------------|--------------|---------|---------|-------|------|-----------|
|   | Beta-lactam-inducible penicillin-binding protein <sup>d</sup> | GOLPN8 | <i>mecC</i> <sup>c</sup> | NTNFDIYGK    | 536.260 | 742.380 | 13.99 | 29.0 | excluded  |
|   | Beta-lactam-inducible penicillin-binding protein <sup>d</sup> | GOLPN8 | <i>mecC</i> <sup>c</sup> | NTNFDIYGK    | 536.260 | 856.420 | 13.99 | 29.0 | excluded  |
|   | Beta-lactam-inducible penicillin-binding protein <sup>d</sup> | GOLPN8 | <i>mecC</i> <sup>c</sup> | NTNFDIYGK    | 536.260 | 957.470 | 13.99 | 29.0 | excluded  |
|   | Beta-lactam-inducible penicillin-binding protein <sup>d</sup> | GOLPN8 | <i>mecC</i> <sup>c</sup> | NTQLNFIYEDK  | 692.840 | 667.330 | 16.61 | 35.0 | excluded  |
|   | Beta-lactam-inducible penicillin-binding protein <sup>d</sup> | GOLPN8 | <i>mecC</i> <sup>c</sup> | NTQLNFIYEDK  | 692.840 | 814.400 | 16.61 | 35.0 | excluded  |
|   | Beta-lactam-inducible penicillin-binding protein <sup>d</sup> | GOLPN8 | <i>mecC</i> <sup>c</sup> | NTQLNFIYEDK  | 692.840 | 928.440 | 16.61 | 35.0 | excluded  |
|   | Beta-lactam-inducible penicillin-binding protein <sup>d</sup> | GOLPN8 | <i>mecC</i> <sup>c</sup> | QAISSDNIFFAR | 749.370 | 540.290 | 17.60 | 38.0 | excluded  |
|   | Beta-lactam-inducible penicillin-binding protein <sup>d</sup> | GOLPN8 | <i>mecC</i> <sup>c</sup> | QAISSDNIFFAR | 749.370 | 767.420 | 17.60 | 38.0 | excluded  |
|   | Beta-lactam-inducible penicillin-binding protein <sup>d</sup> | GOLPN8 | <i>mecC</i> <sup>c</sup> | QAISSDNIFFAR | 749.370 | 882.450 | 17.60 | 38.0 | excluded  |
| R | Beta-lactam-inducible penicillin-binding protein <sup>d</sup> | GOLPN8 | <i>mecC</i> <sup>c</sup> | SYNLQINTIK   | 597.330 | 716.430 | 15.10 | 31.0 | conserved |
| R | Beta-lactam-inducible penicillin-binding protein <sup>d</sup> | GOLPN8 | <i>mecC</i> <sup>c</sup> | SYNLQINTIK   | 597.330 | 829.510 | 15.10 | 31.0 | conserved |

|   |                                                               |        |                          |               |         |          |       |      |           |
|---|---------------------------------------------------------------|--------|--------------------------|---------------|---------|----------|-------|------|-----------|
| R | Beta-lactam-inducible penicillin-binding protein <sup>d</sup> | GOLPN8 | <i>mecC</i> <sup>c</sup> | SYNLQINTIK    | 597.330 | 943.560  | 15.10 | 31.0 | conserved |
|   | Beta-lactam-inducible penicillin-binding protein <sup>d</sup> | GOLPN8 | <i>mecC</i> <sup>c</sup> | TGNTYEIGIVPNK | 703.370 | 358.210  | 14.70 | 36.0 | excluded  |
|   | Beta-lactam-inducible penicillin-binding protein <sup>d</sup> | GOLPN8 | <i>mecC</i> <sup>c</sup> | TGNTYEIGIVPNK | 703.370 | 740.470  | 14.70 | 36.0 | excluded  |
|   | Beta-lactam-inducible penicillin-binding protein <sup>d</sup> | GOLPN8 | <i>mecC</i> <sup>c</sup> | TGNTYEIGIVPNK | 703.370 | 869.510  | 14.70 | 36.0 | excluded  |
|   | Beta-lactam-inducible penicillin-binding protein <sup>d</sup> | GOLPN8 | <i>mecC</i> <sup>c</sup> | VYDDLVDNGK    | 601.270 | 824.380  | 11.65 | 31.0 | excluded  |
|   | Beta-lactam-inducible penicillin-binding protein <sup>d</sup> | GOLPN8 | <i>mecC</i> <sup>c</sup> | VYDDLVDNGK    | 601.270 | 939.410  | 11.65 | 31.0 | excluded  |
|   | Beta-lactam-inducible penicillin-binding protein <sup>d</sup> | GOLPN8 | <i>mecC</i> <sup>c</sup> | VYDDLVDNGK    | 601.270 | 1102.470 | 11.65 | 31.0 | excluded  |
|   | Immunoglobulin G-binding protein A                            | P38507 | <i>spa</i>               | ADAQQNK       | 387.690 | 517.270  | 1.38  | 17.0 | excluded  |
|   | Immunoglobulin G-binding protein A                            | P38507 | <i>spa</i>               | ADAQQNK       | 387.690 | 588.310  | 1.38  | 18.0 | excluded  |
|   | Immunoglobulin G-binding protein A                            | P38507 | <i>spa</i>               | ADAQQNK       | 387.690 | 703.340  | 1.38  | 18.0 | excluded  |
|   | Immunoglobulin G-binding protein A                            | P38507 | <i>spa</i>               | ADAQQNK       | 391.690 | 525.270  | 1.38  | 17.0 | excluded  |

|                                    |        |            |          |         |         |      |      |          |
|------------------------------------|--------|------------|----------|---------|---------|------|------|----------|
| Immunoglobulin G-binding protein A | P38507 | <i>spa</i> | ADAQQNK  | 391.690 | 596.310 | 1.38 | 18.0 | excluded |
| Immunoglobulin G-binding protein A | P38507 | <i>spa</i> | ADAQQNK  | 391.690 | 711.340 | 1.38 | 18.0 | excluded |
| Immunoglobulin G-binding protein A | P38507 | <i>spa</i> | ADNNFNK  | 411.690 | 522.270 | 5.68 | 20.0 | excluded |
| Immunoglobulin G-binding protein A | P38507 | <i>spa</i> | ADNNFNK  | 411.690 | 636.310 | 5.68 | 18.0 | excluded |
| Immunoglobulin G-binding protein A | P38507 | <i>spa</i> | ADNNFNK  | 411.690 | 751.340 | 5.68 | 18.0 | excluded |
| Immunoglobulin G-binding protein A | P38507 | <i>spa</i> | ADNNFNK  | 415.690 | 530.270 | 5.68 | 20.0 | excluded |
| Immunoglobulin G-binding protein A | P38507 | <i>spa</i> | ADNNFNK  | 415.690 | 644.310 | 5.68 | 18.0 | excluded |
| Immunoglobulin G-binding protein A | P38507 | <i>spa</i> | ADNNFNK  | 415.690 | 759.340 | 5.68 | 18.0 | excluded |
| Immunoglobulin G-binding protein A | P38507 | <i>spa</i> | ANGTTADK | 389.190 | 434.220 | 1.38 | 20.0 | excluded |
| Immunoglobulin G-binding protein A | P38507 | <i>spa</i> | ANGTTADK | 389.190 | 592.290 | 1.38 | 18.0 | excluded |
| Immunoglobulin G-binding protein A | P38507 | <i>spa</i> | ANGTTADK | 389.190 | 706.340 | 1.38 | 18.0 | excluded |

|   |                                    |        |            |                 |         |         |       |      |           |
|---|------------------------------------|--------|------------|-----------------|---------|---------|-------|------|-----------|
|   | Immunoglobulin G-binding protein A | P38507 | <i>spa</i> | ANGTTADK        | 393.190 | 442.220 | 1.38  | 20.0 | excluded  |
|   | Immunoglobulin G-binding protein A | P38507 | <i>spa</i> | ANGTTADK        | 393.190 | 600.290 | 1.38  | 18.0 | excluded  |
|   | Immunoglobulin G-binding protein A | P38507 | <i>spa</i> | ANGTTADK        | 393.190 | 714.340 | 1.38  | 18.0 | excluded  |
| T | Immunoglobulin G-binding protein A | P38507 | <i>spa</i> | DDPSQSANLLAEAK  | 729.860 | 614.830 | 14.00 | 32.0 | conserved |
| T | Immunoglobulin G-binding protein A | P38507 | <i>spa</i> | DDPSQSANLLAEAK  | 729.860 | 829.480 | 14.00 | 35.0 | conserved |
| T | Immunoglobulin G-binding protein A | P38507 | <i>spa</i> | DDPSQSANLLAEAK  | 729.860 | 916.510 | 14.00 | 35.0 | conserved |
|   | Immunoglobulin G-binding protein A | P38507 | <i>spa</i> | DDPSQSANLLAEAK  | 733.860 | 618.830 | 14.00 | 32.0 | excluded  |
|   | Immunoglobulin G-binding protein A | P38507 | <i>spa</i> | DDPSQSANLLAEAK  | 733.860 | 837.480 | 14.00 | 35.0 | excluded  |
|   | Immunoglobulin G-binding protein A | P38507 | <i>spa</i> | DDPSQSANLLAEAK  | 733.860 | 924.510 | 14.00 | 35.0 | excluded  |
| T | Immunoglobulin G-binding protein A | P38507 | <i>spa</i> | DDPSQSANVLGEAQK | 779.870 | 532.270 | 11.90 | 34.0 | conserved |
| T | Immunoglobulin G-binding protein A | P38507 | <i>spa</i> | DDPSQSANVLGEAQK | 779.870 | 664.840 | 11.90 | 34.0 | conserved |

|   |                                    |        |            |                 |         |         |       |      |           |
|---|------------------------------------|--------|------------|-----------------|---------|---------|-------|------|-----------|
| T | Immunoglobulin G-binding protein A | P38507 | <i>spa</i> | DDPSQSANVLGEAQK | 779.870 | 929.510 | 11.90 | 35.0 | conserved |
|   | Immunoglobulin G-binding protein A | P38507 | <i>spa</i> | DDPSQSANVLGEAQK | 783.870 | 540.270 | 11.90 | 34.0 | excluded  |
|   | Immunoglobulin G-binding protein A | P38507 | <i>spa</i> | DDPSQSANVLGEAQK | 783.870 | 668.870 | 11.90 | 34.0 | excluded  |
|   | Immunoglobulin G-binding protein A | P38507 | <i>spa</i> | DDPSQSANVLGEAQK | 783.870 | 937.510 | 11.90 | 35.0 | excluded  |
| T | Immunoglobulin G-binding protein A | P38507 | <i>spa</i> | DDPSQSTNVLGEAK  | 730.850 | 615.820 | 11.70 | 33.0 | conserved |
| T | Immunoglobulin G-binding protein A | P38507 | <i>spa</i> | DDPSQSTNVLGEAK  | 730.850 | 831.460 | 11.70 | 40.0 | conserved |
| T | Immunoglobulin G-binding protein A | P38507 | <i>spa</i> | DDPSQSTNVLGEAK  | 730.850 | 918.490 | 11.70 | 38.0 | conserved |
|   | Immunoglobulin G-binding protein A | P38507 | <i>spa</i> | DDPSQSTNVLGEAK  | 734.850 | 619.820 | 11.70 | 33.0 | excluded  |
|   | Immunoglobulin G-binding protein A | P38507 | <i>spa</i> | DDPSQSTNVLGEAK  | 734.850 | 839.460 | 11.70 | 40.0 | excluded  |
|   | Immunoglobulin G-binding protein A | P38507 | <i>spa</i> | DDPSQSTNVLGEAK  | 734.850 | 926.490 | 11.70 | 38.0 | excluded  |
|   | Immunoglobulin G-binding protein A | P38507 | <i>spa</i> | DDPSVSK         | 374.180 | 259.150 | 5.39  | 18.0 | excluded  |



|   |                                    |        |            |                      |         |          |       |      |           |
|---|------------------------------------|--------|------------|----------------------|---------|----------|-------|------|-----------|
|   | Immunoglobulin G-binding protein A | P38507 | <i>spa</i> | DDPSVSK              | 374.180 | 420.250  | 5.39  | 24.0 | excluded  |
|   | Immunoglobulin G-binding protein A | P38507 | <i>spa</i> | DDPSVSK              | 374.180 | 517.300  | 5.39  | 16.0 | excluded  |
|   | Immunoglobulin G-binding protein A | P38507 | <i>spa</i> | DDPSVSK              | 378.180 | 263.150  | 5.39  | 18.0 | excluded  |
|   | Immunoglobulin G-binding protein A | P38507 | <i>spa</i> | DDPSVSK              | 378.180 | 428.250  | 5.39  | 24.0 | excluded  |
|   | Immunoglobulin G-binding protein A | P38507 | <i>spa</i> | DDPSVSK              | 378.180 | 525.300  | 5.39  | 16.0 | excluded  |
| T | Immunoglobulin G-binding protein A | P38507 | <i>spa</i> | DQQSAFYEILNMPNLNEEQR | 813.710 | 500.250  | 22.50 | 28.0 | conserved |
| T | Immunoglobulin G-binding protein A | P38507 | <i>spa</i> | DQQSAFYEILNMPNLNEEQR | 813.710 | 969.390  | 22.50 | 32.0 | conserved |
| T | Immunoglobulin G-binding protein A | P38507 | <i>spa</i> | DQQSAFYEILNMPNLNEEQR | 813.710 | 999.490  | 22.50 | 33.0 | conserved |
|   | Immunoglobulin G-binding protein A | P38507 | <i>spa</i> | DQQSAFYEILNMPNLNEEQR | 817.040 | 505.250  | 22.50 | 28.0 | excluded  |
|   | Immunoglobulin G-binding protein A | P38507 | <i>spa</i> | DQQSAFYEILNMPNLNEEQR | 817.040 | 969.390  | 22.50 | 32.0 | excluded  |
|   | Immunoglobulin G-binding protein A | P38507 | <i>spa</i> | DQQSAFYEILNMPNLNEEQR | 817.040 | 1009.490 | 22.50 | 33.0 | excluded  |

|   |                                    |        |            |                      |         |          |       |      |           |
|---|------------------------------------|--------|------------|----------------------|---------|----------|-------|------|-----------|
| T | Immunoglobulin G-binding protein A | P38507 | <i>spa</i> | EDGNGVHVVKPGDTVNDIAK | 688.680 | 515.260  | 12.40 | 34.0 | conserved |
| T | Immunoglobulin G-binding protein A | P38507 | <i>spa</i> | EDGNGVHVVKPGDTVNDIAK | 688.680 | 746.910  | 12.40 | 33.0 | conserved |
| T | Immunoglobulin G-binding protein A | P38507 | <i>spa</i> | EDGNGVHVVKPGDTVNDIAK | 688.680 | 1029.520 | 12.40 | 36.0 | conserved |
|   | Immunoglobulin G-binding protein A | P38507 | <i>spa</i> | EDGNGVHVVKPGDTVNDIAK | 691.350 | 519.260  | 12.40 | 34.0 | excluded  |
|   | Immunoglobulin G-binding protein A | P38507 | <i>spa</i> | EDGNGVHVVKPGDTVNDIAK | 691.350 | 750.910  | 12.40 | 33.0 | excluded  |
|   | Immunoglobulin G-binding protein A | P38507 | <i>spa</i> | EDGNGVHVVKPGDTVNDIAK | 691.350 | 1037.520 | 12.40 | 36.0 | excluded  |
|   | Immunoglobulin G-binding protein A | P38507 | <i>spa</i> | EDGNKPGK             | 422.710 | 301.190  | 1.38  | 27.0 | excluded  |
|   | Immunoglobulin G-binding protein A | P38507 | <i>spa</i> | EDGNKPGK             | 422.710 | 429.280  | 1.38  | 26.0 | excluded  |
|   | Immunoglobulin G-binding protein A | P38507 | <i>spa</i> | EDGNKPGK             | 422.710 | 600.350  | 1.38  | 24.0 | excluded  |
|   | Immunoglobulin G-binding protein A | P38507 | <i>spa</i> | EDGNKPGK             | 426.710 | 309.190  | 1.38  | 27.0 | excluded  |
|   | Immunoglobulin G-binding protein A | P38507 | <i>spa</i> | EDGNKPGK             | 426.710 | 437.280  | 1.38  | 26.0 | excluded  |

|   |                                    |        |            |           |         |         |       |      |           |
|---|------------------------------------|--------|------------|-----------|---------|---------|-------|------|-----------|
|   | Immunoglobulin G-binding protein A | P38507 | <i>spa</i> | EDGNKPGK  | 426.710 | 608.350 | 1.38  | 24.0 | excluded  |
|   | Immunoglobulin G-binding protein A | P38507 | <i>spa</i> | EEDNNKPGK | 515.740 | 301.190 | 1.37  | 31.0 | excluded  |
|   | Immunoglobulin G-binding protein A | P38507 | <i>spa</i> | EEDNNKPGK | 515.740 | 429.280 | 1.37  | 31.0 | excluded  |
|   | Immunoglobulin G-binding protein A | P38507 | <i>spa</i> | EEDNNKPGK | 515.740 | 772.400 | 1.37  | 27.0 | excluded  |
|   | Immunoglobulin G-binding protein A | P38507 | <i>spa</i> | EEDNNKPGK | 519.740 | 309.190 | 1.37  | 31.0 | excluded  |
|   | Immunoglobulin G-binding protein A | P38507 | <i>spa</i> | EEDNNKPGK | 519.740 | 437.280 | 1.37  | 31.0 | excluded  |
|   | Immunoglobulin G-binding protein A | P38507 | <i>spa</i> | EEDNNKPGK | 519.740 | 780.400 | 1.37  | 27.0 | excluded  |
| T | Immunoglobulin G-binding protein A | P38507 | <i>spa</i> | EILAEAK   | 387.220 | 347.190 | 10.00 | 15.0 | conserved |
| T | Immunoglobulin G-binding protein A | P38507 | <i>spa</i> | EILAEAK   | 387.220 | 418.230 | 10.00 | 18.0 | conserved |
| T | Immunoglobulin G-binding protein A | P38507 | <i>spa</i> | EILAEAK   | 387.220 | 531.310 | 10.00 | 19.0 | conserved |
|   | Immunoglobulin G-binding protein A | P38507 | <i>spa</i> | EILAEAK   | 391.220 | 355.190 | 10.00 | 15.0 | excluded  |

|   |                                    |        |            |                      |         |         |       |      |           |
|---|------------------------------------|--------|------------|----------------------|---------|---------|-------|------|-----------|
|   | Immunoglobulin G-binding protein A | P38507 | <i>spa</i> | EILAEAK              | 391.220 | 426.230 | 10.00 | 18.0 | excluded  |
|   | Immunoglobulin G-binding protein A | P38507 | <i>spa</i> | EILAEAK              | 391.220 | 539.310 | 10.00 | 19.0 | excluded  |
| T | Immunoglobulin G-binding protein A | P38507 | <i>spa</i> | EQQNAFYEILHLPNLNEEQR | 829.080 | 884.450 | 22.55 | 33.0 | conserved |
| T | Immunoglobulin G-binding protein A | P38507 | <i>spa</i> | EQQNAFYEILHLPNLNEEQR | 829.080 | 962.980 | 22.55 | 33.0 | conserved |
| T | Immunoglobulin G-binding protein A | P38507 | <i>spa</i> | EQQNAFYEILHLPNLNEEQR | 829.080 | 993.510 | 22.55 | 33.0 | conserved |
|   | Immunoglobulin G-binding protein A | P38507 | <i>spa</i> | EQQNAFYEILHLPNLNEEQR | 832.400 | 889.450 | 22.55 | 33.0 | excluded  |
|   | Immunoglobulin G-binding protein A | P38507 | <i>spa</i> | EQQNAFYEILHLPNLNEEQR | 832.400 | 962.980 | 22.55 | 33.0 | excluded  |
|   | Immunoglobulin G-binding protein A | P38507 | <i>spa</i> | EQQNAFYEILHLPNLNEEQR | 832.400 | 998.510 | 22.55 | 33.0 | excluded  |
| T | Immunoglobulin G-binding protein A | P38507 | <i>spa</i> | EQQNAFYEILHLPNLTEEQR | 824.740 | 877.960 | 23.20 | 33.0 | conserved |
| T | Immunoglobulin G-binding protein A | P38507 | <i>spa</i> | EQQNAFYEILHLPNLTEEQR | 824.740 | 951.490 | 23.20 | 33.0 | conserved |
| T | Immunoglobulin G-binding protein A | P38507 | <i>spa</i> | EQQNAFYEILHLPNLTEEQR | 824.740 | 986.490 | 23.20 | 44.0 | conserved |

|   |                                    |        |            |                      |         |          |       |      |           |
|---|------------------------------------|--------|------------|----------------------|---------|----------|-------|------|-----------|
|   | Immunoglobulin G-binding protein A | P38507 | <i>spa</i> | EQQNAFYEILHLPNLTEEQR | 828.070 | 882.960  | 23.20 | 33.0 | excluded  |
|   | Immunoglobulin G-binding protein A | P38507 | <i>spa</i> | EQQNAFYEILHLPNLTEEQR | 828.070 | 956.490  | 23.20 | 33.0 | excluded  |
|   | Immunoglobulin G-binding protein A | P38507 | <i>spa</i> | EQQNAFYEILHLPNLTEEQR | 828.070 | 996.490  | 23.20 | 44.0 | excluded  |
| T | Immunoglobulin G-binding protein A | P38507 | <i>spa</i> | EQQNAFYEILNMPNLNEEQR | 827.390 | 500.250  | 22.50 | 30.0 | conserved |
| T | Immunoglobulin G-binding protein A | P38507 | <i>spa</i> | EQQNAFYEILNMPNLNEEQR | 827.390 | 735.870  | 22.50 | 24.0 | conserved |
| T | Immunoglobulin G-binding protein A | P38507 | <i>spa</i> | EQQNAFYEILNMPNLNEEQR | 827.390 | 999.490  | 22.50 | 31.0 | conserved |
|   | Immunoglobulin G-binding protein A | P38507 | <i>spa</i> | EQQNAFYEILNMPNLNEEQR | 830.720 | 505.250  | 22.50 | 30.0 | excluded  |
|   | Immunoglobulin G-binding protein A | P38507 | <i>spa</i> | EQQNAFYEILNMPNLNEEQR | 830.720 | 740.870  | 22.50 | 24.0 | excluded  |
|   | Immunoglobulin G-binding protein A | P38507 | <i>spa</i> | EQQNAFYEILNMPNLNEEQR | 830.720 | 1009.490 | 22.50 | 31.0 | excluded  |
|   | Immunoglobulin G-binding protein A | P38507 | <i>spa</i> | IAADNK               | 316.170 | 376.180  | 2.18  | 22.0 | excluded  |
|   | Immunoglobulin G-binding protein A | P38507 | <i>spa</i> | IAADNK               | 316.170 | 447.220  | 2.18  | 14.0 | excluded  |

|   |                                    |        |            |          |         |         |      |      |           |
|---|------------------------------------|--------|------------|----------|---------|---------|------|------|-----------|
|   | Immunoglobulin G-binding protein A | P38507 | <i>spa</i> | IAADNK   | 316.170 | 518.260 | 2.18 | 15.0 | excluded  |
|   | Immunoglobulin G-binding protein A | P38507 | <i>spa</i> | IAADNK   | 320.170 | 384.180 | 2.18 | 22.0 | excluded  |
|   | Immunoglobulin G-binding protein A | P38507 | <i>spa</i> | IAADNK   | 320.170 | 455.220 | 2.18 | 14.0 | excluded  |
|   | Immunoglobulin G-binding protein A | P38507 | <i>spa</i> | IAADNK   | 320.170 | 526.260 | 2.18 | 15.0 | excluded  |
| T | Immunoglobulin G-binding protein A | P38507 | <i>spa</i> | LNDAQAPK | 428.730 | 514.300 | 7.00 | 23.0 | conserved |
| T | Immunoglobulin G-binding protein A | P38507 | <i>spa</i> | LNDAQAPK | 428.730 | 629.330 | 7.00 | 21.0 | conserved |
| T | Immunoglobulin G-binding protein A | P38507 | <i>spa</i> | LNDAQAPK | 428.730 | 743.370 | 7.00 | 20.0 | conserved |
|   | Immunoglobulin G-binding protein A | P38507 | <i>spa</i> | LNDAQAPK | 432.760 | 522.300 | 7.00 | 23.0 | excluded  |
|   | Immunoglobulin G-binding protein A | P38507 | <i>spa</i> | LNDAQAPK | 432.760 | 637.330 | 7.00 | 21.0 | excluded  |
|   | Immunoglobulin G-binding protein A | P38507 | <i>spa</i> | LNDAQAPK | 432.760 | 751.370 | 7.00 | 20.0 | excluded  |
| T | Immunoglobulin G-binding protein A | P38507 | <i>spa</i> | LNDSQAPK | 436.730 | 530.290 | 6.80 | 23.0 | conserved |

|   |                                    |        |            |          |         |         |      |      |           |
|---|------------------------------------|--------|------------|----------|---------|---------|------|------|-----------|
| T | Immunoglobulin G-binding protein A | P38507 | <i>spa</i> | LNDSQAPK | 436.730 | 645.320 | 6.80 | 19.0 | conserved |
| T | Immunoglobulin G-binding protein A | P38507 | <i>spa</i> | LNDSQAPK | 436.730 | 759.360 | 6.80 | 20.0 | conserved |
|   | Immunoglobulin G-binding protein A | P38507 | <i>spa</i> | LNDSQAPK | 440.730 | 538.290 | 6.80 | 23.0 | excluded  |
|   | Immunoglobulin G-binding protein A | P38507 | <i>spa</i> | LNDSQAPK | 440.730 | 653.320 | 6.80 | 19.0 | excluded  |
|   | Immunoglobulin G-binding protein A | P38507 | <i>spa</i> | LNDSQAPK | 440.730 | 767.360 | 6.80 | 20.0 | excluded  |
| T | Immunoglobulin G-binding protein A | P38507 | <i>spa</i> | LNESQAPK | 443.740 | 530.290 | 7.10 | 23.0 | conserved |
| T | Immunoglobulin G-binding protein A | P38507 | <i>spa</i> | LNESQAPK | 443.740 | 659.340 | 7.10 | 21.0 | conserved |
| T | Immunoglobulin G-binding protein A | P38507 | <i>spa</i> | LNESQAPK | 443.740 | 773.380 | 7.10 | 22.0 | conserved |
|   | Immunoglobulin G-binding protein A | P38507 | <i>spa</i> | LNESQAPK | 447.740 | 538.290 | 7.10 | 23.0 | excluded  |
|   | Immunoglobulin G-binding protein A | P38507 | <i>spa</i> | LNESQAPK | 447.740 | 667.340 | 7.10 | 21.0 | excluded  |
|   | Immunoglobulin G-binding protein A | P38507 | <i>spa</i> | LNESQAPK | 447.740 | 781.380 | 7.10 | 22.0 | excluded  |

|   |                                    |        |            |               |         |         |       |      |           |
|---|------------------------------------|--------|------------|---------------|---------|---------|-------|------|-----------|
| T | Immunoglobulin G-binding protein A | P38507 | <i>spa</i> | NGFIQSLK      | 453.760 | 475.290 | 14.40 | 23.0 | conserved |
| T | Immunoglobulin G-binding protein A | P38507 | <i>spa</i> | NGFIQSLK      | 453.760 | 588.370 | 14.40 | 23.0 | conserved |
| T | Immunoglobulin G-binding protein A | P38507 | <i>spa</i> | NGFIQSLK      | 453.760 | 792.460 | 14.40 | 23.0 | conserved |
|   | Immunoglobulin G-binding protein A | P38507 | <i>spa</i> | NGFIQSLK      | 457.760 | 483.290 | 14.40 | 23.0 | excluded  |
|   | Immunoglobulin G-binding protein A | P38507 | <i>spa</i> | NGFIQSLK      | 457.760 | 596.370 | 14.40 | 23.0 | excluded  |
|   | Immunoglobulin G-binding protein A | P38507 | <i>spa</i> | NGFIQSLK      | 457.760 | 800.460 | 14.40 | 23.0 | excluded  |
| T | Immunoglobulin G-binding protein A | P38507 | <i>spa</i> | NMIKPGQELVVDK | 735.900 | 556.820 | 13.40 | 38.0 | conserved |
| T | Immunoglobulin G-binding protein A | P38507 | <i>spa</i> | NMIKPGQELVVDK | 735.900 | 830.460 | 13.40 | 41.0 | conserved |
| T | Immunoglobulin G-binding protein A | P38507 | <i>spa</i> | NMIKPGQELVVDK | 735.900 | 984.540 | 13.40 | 38.0 | conserved |
|   | Immunoglobulin G-binding protein A | P38507 | <i>spa</i> | NMIKPGQELVVDK | 739.900 | 560.820 | 13.40 | 38.0 | excluded  |
|   | Immunoglobulin G-binding protein A | P38507 | <i>spa</i> | NMIKPGQELVVDK | 739.900 | 838.460 | 13.40 | 41.0 | excluded  |



|                                    |        |            |               |         |         |       |      |          |
|------------------------------------|--------|------------|---------------|---------|---------|-------|------|----------|
| Immunoglobulin G-binding protein A | P38507 | <i>spa</i> | NMIKPGQELVVDK | 739.900 | 992.540 | 13.40 | 38.0 | excluded |
| Immunoglobulin G-binding protein A | P38507 | <i>spa</i> | QPANHADANK    | 533.260 | 332.190 | 9.31  | 29.0 | excluded |
| Immunoglobulin G-binding protein A | P38507 | <i>spa</i> | QPANHADANK    | 533.260 | 447.220 | 9.31  | 29.0 | excluded |
| Immunoglobulin G-binding protein A | P38507 | <i>spa</i> | QPANHADANK    | 533.260 | 840.400 | 9.31  | 28.0 | excluded |
| Immunoglobulin G-binding protein A | P38507 | <i>spa</i> | QPANHADANK    | 537.260 | 340.190 | 9.31  | 29.0 | excluded |
| Immunoglobulin G-binding protein A | P38507 | <i>spa</i> | QPANHADANK    | 537.260 | 455.220 | 9.31  | 29.0 | excluded |
| Immunoglobulin G-binding protein A | P38507 | <i>spa</i> | QPANHADANK    | 537.260 | 848.400 | 9.31  | 28.0 | excluded |
| Delta-hemolysin                    | P0C1V1 | <i>hld</i> | AQDIISTIGDLVK | 686.890 | 745.450 | 22.80 | 35.0 | excluded |
| Delta-hemolysin                    | P0C1V1 | <i>hld</i> | AQDIISTIGDLVK | 686.890 | 832.480 | 22.80 | 35.0 | excluded |
| Delta-hemolysin                    | P0C1V1 | <i>hld</i> | AQDIISTIGDLVK | 686.890 | 945.560 | 22.80 | 35.0 | excluded |
| Delta-hemolysin                    | P0C1V1 | <i>hld</i> | AQDIISTISDLVK | 701.890 | 775.460 | 23.47 | 36.0 | excluded |
| Delta-hemolysin                    | P0C1V1 | <i>hld</i> | AQDIISTISDLVK | 701.890 | 862.490 | 23.47 | 36.0 | excluded |
| Delta-hemolysin                    | P0C1V1 | <i>hld</i> | AQDIISTISDLVK | 701.890 | 975.570 | 23.47 | 36.0 | excluded |

|                 |        |            |                     |         |         |       |      |          |
|-----------------|--------|------------|---------------------|---------|---------|-------|------|----------|
| Delta-hemolysin | P0C1V1 | <i>hld</i> | M[For]AQDIISTIGDLVK | 766.410 | 474.170 | 28.44 | 38.0 | excluded |
| Delta-hemolysin | P0C1V1 | <i>hld</i> | M[For]AQDIISTIGDLVK | 766.410 | 832.480 | 28.44 | 38.0 | excluded |
| Delta-hemolysin | P0C1V1 | <i>hld</i> | M[For]AQDIISTIGDLVK | 766.410 | 945.560 | 28.44 | 38.0 | excluded |
| Delta-hemolysin | P0C1V1 | <i>hld</i> | M[For]AQDIISTISDLVK | 781.410 | 474.170 | 28.68 | 38.0 | excluded |
| Delta-hemolysin | P0C1V1 | <i>hld</i> | M[For]AQDIISTISDLVK | 781.410 | 862.490 | 28.68 | 38.0 | excluded |
| Delta-hemolysin | P0C1V1 | <i>hld</i> | M[For]AQDIISTISDLVK | 781.410 | 975.570 | 28.68 | 38.0 | excluded |
| Delta-hemolysin | P0C1V1 | <i>hld</i> | M[Oxi]AQDIISTIGDLVK | 760.410 | 462.170 | 22.80 | 38.0 | excluded |
| Delta-hemolysin | P0C1V1 | <i>hld</i> | M[Oxi]AQDIISTIGDLVK | 760.410 | 832.480 | 22.80 | 38.0 | excluded |
| Delta-hemolysin | P0C1V1 | <i>hld</i> | M[Oxi]AQDIISTIGDLVK | 760.410 | 945.560 | 22.80 | 38.0 | excluded |
| Delta-hemolysin | P0C1V1 | <i>hld</i> | M[Oxi]AQDIISTISDLVK | 775.410 | 674.410 | 23.56 | 39.0 | excluded |
| Delta-hemolysin | P0C1V1 | <i>hld</i> | M[Oxi]AQDIISTISDLVK | 775.410 | 862.490 | 23.56 | 39.0 | excluded |
| Delta-hemolysin | P0C1V1 | <i>hld</i> | M[Oxi]AQDIISTISDLVK | 775.410 | 975.570 | 23.56 | 39.0 | excluded |
| Delta-hemolysin | P0C1V1 | <i>hld</i> | MAQDIISTIGDLVK      | 752.410 | 446.170 | 23.49 | 38.0 | excluded |
| Delta-hemolysin | P0C1V1 | <i>hld</i> | MAQDIISTIGDLVK      | 752.410 | 832.480 | 23.49 | 38.0 | excluded |
| Delta-hemolysin | P0C1V1 | <i>hld</i> | MAQDIISTIGDLVK      | 752.410 | 945.560 | 23.49 | 38.0 | excluded |
| Delta-hemolysin | P0C1V1 | <i>hld</i> | MAQDIISTISDLVK      | 767.410 | 674.410 | 24.21 | 39.0 | excluded |
| Delta-hemolysin | P0C1V1 | <i>hld</i> | MAQDIISTISDLVK      | 767.410 | 775.460 | 24.21 | 39.0 | excluded |

|  |                 |        |            |                |         |         |       |      |          |
|--|-----------------|--------|------------|----------------|---------|---------|-------|------|----------|
|  | Delta-hemolysin | P0C1V1 | <i>hld</i> | MAQDIISTISDLVK | 767.410 | 862.490 | 24.21 | 39.0 | excluded |
|  | Delta-hemolysin | P0C1V1 | <i>hld</i> | WIIDTVNK       | 494.780 | 576.300 | 16.35 | 27.0 | excluded |
|  | Delta-hemolysin | P0C1V1 | <i>hld</i> | WIIDTVNK       | 494.780 | 689.380 | 16.35 | 27.0 | excluded |
|  | Delta-hemolysin | P0C1V1 | <i>hld</i> | WIIDTVNK       | 494.780 | 802.470 | 16.35 | 27.0 | excluded |
|  | Delta-hemolysin | P0C1V1 | <i>hld</i> | WIIDTVNKFTK    | 682.880 | 736.440 | 18.21 | 35.0 | excluded |
|  | Delta-hemolysin | P0C1V1 | <i>hld</i> | WIIDTVNKFTK    | 682.880 | 837.480 | 18.21 | 35.0 | excluded |
|  | Delta-hemolysin | P0C1V1 | <i>hld</i> | WIIDTVNKFTK    | 682.880 | 952.510 | 18.21 | 35.0 | excluded |

|   |                                                            |        |             |               |         |         |       |      |           |
|---|------------------------------------------------------------|--------|-------------|---------------|---------|---------|-------|------|-----------|
| V | Leukocidin-F subunit (Part of Panton Valentine Leukocidin) | P31715 | <i>lukF</i> | GNFNPEFIGVLSR | 725.380 | 531.420 | 19.90 | 37.0 | conserved |
| V | Leukocidin-F subunit (Part of Panton Valentine Leukocidin) | P31715 | <i>lukF</i> | GNFNPEFIGVLSR | 725.380 | 791.480 | 19.90 | 37.0 | conserved |
| V | Leukocidin-F subunit (Part of Panton Valentine Leukocidin) | P31715 | <i>lukF</i> | GNFNPEFIGVLSR | 725.380 | 920.520 | 19.90 | 37.0 | conserved |

|  |                                                            |        |             |               |         |         |       |      |          |
|--|------------------------------------------------------------|--------|-------------|---------------|---------|---------|-------|------|----------|
|  | Leukocidin-F subunit (Part of Panton Valentine Leukocidin) | P31715 | <i>lukF</i> | GNFNPEFIGVLSR | 730.380 | 541.320 | 19.90 | 37.0 | excluded |
|  | Leukocidin-F subunit (Part of Panton Valentine             | P31715 | <i>lukF</i> | GNFNPEFIGVLSR | 730.380 | 801.480 | 19.90 | 37.0 | excluded |

|                                                            |        |             |               |         |         |       |      |          |  |
|------------------------------------------------------------|--------|-------------|---------------|---------|---------|-------|------|----------|--|
| Leukocidin)                                                |        |             |               |         |         |       |      |          |  |
| Leukocidin-F subunit (Part of Panton Valentine Leukocidin) | P31715 | <i>lukF</i> | GNFNPEFIGVLSR | 730.380 | 930.520 | 19.90 | 37.0 | excluded |  |
| Leukocidin-F subunit (Part of Panton Valentine Leukocidin) | P31715 | <i>lukF</i> | ITVTYQR       | 440.750 | 567.290 | 10.40 | 24.0 | excluded |  |
| Leukocidin-F subunit (Part of Panton Valentine Leukocidin) | P31715 | <i>lukF</i> | ITVTYQR       | 440.750 | 666.360 | 10.40 | 24.0 | excluded |  |
| Leukocidin-F subunit (Part of Panton Valentine Leukocidin) | P31715 | <i>lukF</i> | ITVTYQR       | 440.750 | 767.400 | 10.40 | 24.0 | excluded |  |
| Leukocidin-F subunit (Part of Panton Valentine Leukocidin) | P31715 | <i>lukF</i> | ITVTYQR       | 445.750 | 577.290 | 10.40 | 24.0 | excluded |  |
| Leukocidin-F subunit (Part of Panton Valentine Leukocidin) | P31715 | <i>lukF</i> | ITVTYQR       | 445.750 | 676.360 | 10.40 | 24.0 | excluded |  |
| Leukocidin-F subunit (Part of Panton Valentine Leukocidin) | P31715 | <i>lukF</i> | ITVTYQR       | 445.750 | 777.400 | 10.40 | 24.0 | excluded |  |
| Leukocidin-F subunit (Part of Panton Valentine             | P31715 | <i>lukF</i> | LIDTQSK       | 402.730 | 463.250 | 7.70  | 23.0 | excluded |  |

|                                                            |        |             |         |         |         |       |      |          |  |
|------------------------------------------------------------|--------|-------------|---------|---------|---------|-------|------|----------|--|
| Leukocidin)                                                |        |             |         |         |         |       |      |          |  |
| Leukocidin-F subunit (Part of Panton Valentine Leukocidin) | P31715 | <i>lukF</i> | LIDTQSK | 402.730 | 578.280 | 7.70  | 23.0 | excluded |  |
| Leukocidin-F subunit (Part of Panton Valentine Leukocidin) | P31715 | <i>lukF</i> | LIDTQSK | 402.730 | 691.360 | 7.70  | 23.0 | excluded |  |
| Leukocidin-F subunit (Part of Panton Valentine Leukocidin) | P31715 | <i>lukF</i> | LIDTQSK | 406.730 | 471.250 | 7.70  | 23.0 | excluded |  |
| Leukocidin-F subunit (Part of Panton Valentine Leukocidin) | P31715 | <i>lukF</i> | LIDTQSK | 406.730 | 586.280 | 7.70  | 23.0 | excluded |  |
| Leukocidin-F subunit (Part of Panton Valentine Leukocidin) | P31715 | <i>lukF</i> | LIDTQSK | 406.730 | 699.360 | 7.70  | 23.0 | excluded |  |
| Leukocidin-F subunit (Part of Panton Valentine Leukocidin) | P31715 | <i>lukF</i> | MPVLSR  | 351.700 | 375.240 | 11.60 | 20.0 | excluded |  |
| Leukocidin-F subunit (Part of Panton Valentine Leukocidin) | P31715 | <i>lukF</i> | MPVLSR  | 351.700 | 474.300 | 11.60 | 20.0 | excluded |  |
| Leukocidin-F subunit (Part of Panton Valentine             | P31715 | <i>lukF</i> | MPVLSR  | 351.700 | 571.360 | 11.60 | 20.0 | excluded |  |

|   |                                                            |        |             |            |         |         |       |      |           |
|---|------------------------------------------------------------|--------|-------------|------------|---------|---------|-------|------|-----------|
|   | Leukocidin)                                                |        |             |            |         |         |       |      |           |
|   | Leukocidin-F subunit (Part of Panton Valentine Leukocidin) | P31715 | <i>lukF</i> | MPVLSR     | 356.700 | 385.240 | 11.60 | 20.0 | excluded  |
|   | Leukocidin-F subunit (Part of Panton Valentine Leukocidin) | P31715 | <i>lukF</i> | MPVLSR     | 356.700 | 484.300 | 11.60 | 20.0 | excluded  |
|   | Leukocidin-F subunit (Part of Panton Valentine Leukocidin) | P31715 | <i>lukF</i> | MPVLSR     | 356.700 | 581.360 | 11.60 | 20.0 | excluded  |
| V | Leukocidin-S subunit (Part of Panton Valentine Leukocidin) | P31716 | <i>lukS</i> | ANSFITSLGK | 519.280 | 618.400 | 15.60 | 28.0 | conserved |
| V | Leukocidin-S subunit (Part of Panton Valentine Leukocidin) | P31716 | <i>lukS</i> | ANSFITSLGK | 519.280 | 765.450 | 15.60 | 28.0 | conserved |
| V | Leukocidin-S subunit (Part of Panton Valentine Leukocidin) | P31716 | <i>lukS</i> | ANSFITSLGK | 519.280 | 852.480 | 15.60 | 28.0 | conserved |
|   | Leukocidin-S subunit (Part of Panton Valentine Leukocidin) | P31716 | <i>lukS</i> | ANSFITSLGK | 523.280 | 626.400 | 15.60 | 28.0 | excluded  |
|   | Leukocidin-S subunit (Part of Panton Valentine             | P31716 | <i>lukS</i> | ANSFITSLGK | 523.280 | 773.450 | 15.60 | 28.0 | excluded  |

|   |                                                            |        |             |            |         |         |       |      |           |
|---|------------------------------------------------------------|--------|-------------|------------|---------|---------|-------|------|-----------|
|   | Leukocidin)                                                |        |             |            |         |         |       |      |           |
|   | Leukocidin-S subunit (Part of Panton Valentine Leukocidin) | P31716 | <i>lukS</i> | ANSFITSLGK | 523.280 | 860.480 | 15.60 | 28.0 | excluded  |
|   | Leukocidin-S subunit (Part of Panton Valentine Leukocidin) | P31716 | <i>lukS</i> | DALILK     | 336.720 | 373.300 | 14.08 | 20.0 | excluded  |
|   | Leukocidin-S subunit (Part of Panton Valentine Leukocidin) | P31716 | <i>lukS</i> | DALILK     | 336.720 | 486.360 | 14.08 | 20.0 | excluded  |
|   | Leukocidin-S subunit (Part of Panton Valentine Leukocidin) | P31716 | <i>lukS</i> | DALILK     | 336.720 | 557.400 | 14.08 | 20.0 | excluded  |
|   | Leukocidin-S subunit (Part of Panton Valentine Leukocidin) | P31716 | <i>lukS</i> | DALILK     | 340.720 | 381.300 | 14.08 | 20.0 | excluded  |
|   | Leukocidin-S subunit (Part of Panton Valentine Leukocidin) | P31716 | <i>lukS</i> | DALILK     | 340.720 | 494.360 | 14.08 | 20.0 | excluded  |
|   | Leukocidin-S subunit (Part of Panton Valentine Leukocidin) | P31716 | <i>lukS</i> | DALILK     | 340.720 | 565.400 | 14.08 | 20.0 | excluded  |
| v | Leukocidin-S subunit (Part of Panton Valentine             | P31716 | <i>lukS</i> | SVQWGIK    | 409.230 | 503.300 | 13.60 | 23.0 | conserved |

| Leukocidin |                                                            |        |             |                |         |         |       |      |           |
|------------|------------------------------------------------------------|--------|-------------|----------------|---------|---------|-------|------|-----------|
| V          | Leukocidin-S subunit (Part of Panton Valentine Leukocidin) | P31716 | <i>lukS</i> | SVQWGIK        | 409.230 | 631.360 | 13.60 | 23.0 | conserved |
| V          | Leukocidin-S subunit (Part of Panton Valentine Leukocidin) | P31716 | <i>lukS</i> | SVQWGIK        | 409.230 | 730.420 | 13.60 | 23.0 | conserved |
|            | Leukocidin-S subunit (Part of Panton Valentine Leukocidin) | P31716 | <i>lukS</i> | SVQWGIK        | 413.230 | 511.300 | 13.60 | 23.0 | excluded  |
|            | Leukocidin-S subunit (Part of Panton Valentine Leukocidin) | P31716 | <i>lukS</i> | SVQWGIK        | 413.230 | 639.360 | 13.60 | 23.0 | excluded  |
|            | Leukocidin-S subunit (Part of Panton Valentine Leukocidin) | P31716 | <i>lukS</i> | SVQWGIK        | 413.230 | 738.420 | 13.60 | 23.0 | excluded  |
| V          | Leukocidin-S subunit (Part of Panton Valentine Leukocidin) | P31716 | <i>lukS</i> | TNDPNVDLINYLPK | 808.420 | 643.400 | 20.00 | 40.0 | conserved |
| V          | Leukocidin-S subunit (Part of Panton Valentine Leukocidin) | P31716 | <i>lukS</i> | TNDPNVDLINYLPK | 808.420 | 860.500 | 20.00 | 40.0 | conserved |
| V          | Leukocidin-S subunit (Part of Panton Valentine Leukocidin) | P31716 | <i>lukS</i> | TNDPNVDLINYLPK | 808.420 | 975.550 | 20.00 | 40.0 | conserved |



Leukocidin

|                                                            |        |      |                |         |         |       |      |          |
|------------------------------------------------------------|--------|------|----------------|---------|---------|-------|------|----------|
| Leukocidin-S subunit (Part of Panton Valentine Leukocidin) | P31716 | lukS | TNDPNVDLINYLPK | 812.420 | 647.400 | 20.00 | 40.0 | excluded |
| Leukocidin-S subunit (Part of Panton Valentine Leukocidin) | P31716 | lukS | TNDPNVDLINYLPK | 812.420 | 868.500 | 20.00 | 40.0 | excluded |
| Leukocidin-S subunit (Part of Panton Valentine Leukocidin) | P31716 | lukS | TNDPNVDLINYLPK | 812.420 | 983.550 | 20.00 | 40.0 | excluded |
| Leukocidin-S subunit (Part of Panton Valentine Leukocidin) | P31716 | lukS | YEVNWK         | 419.710 | 447.200 | 13.19 | 23.0 | excluded |
| Leukocidin-S subunit (Part of Panton Valentine Leukocidin) | P31716 | lukS | YEVNWK         | 419.710 | 546.300 | 13.19 | 23.0 | excluded |
| Leukocidin-S subunit (Part of Panton Valentine Leukocidin) | P31716 | lukS | YEVNWK         | 419.710 | 675.350 | 13.19 | 23.0 | excluded |
| Leukocidin-S subunit (Part of Panton Valentine Leukocidin) | P31716 | lukS | YEVNWK         | 423.710 | 455.200 | 13.19 | 23.0 | excluded |
| Leukocidin-S subunit (Part of Panton Valentine Leukocidin) | P31716 | lukS | YEVNWK         | 423.710 | 554.300 | 13.19 | 23.0 | excluded |

|                                                            |        |             |                          |         |          |       |      |          |
|------------------------------------------------------------|--------|-------------|--------------------------|---------|----------|-------|------|----------|
| Leukocidin)                                                |        |             |                          |         |          |       |      |          |
| Leukocidin-S subunit (Part of Panton Valentine Leukocidin) | P31716 | <i>lukS</i> | YEVNWK                   | 423.710 | 683.350  | 13.19 | 23.0 | excluded |
| Toxic shock syndrome toxin-1                               | P06886 | <i>tst</i>  | FEYNTEKPPINIDEIK         | 650.670 | 519.800  | 17.35 | 37.0 | excluded |
| Toxic shock syndrome toxin-1                               | P06886 | <i>tst</i>  | FEYNTEKPPINIDEIK         | 650.670 | 755.910  | 17.35 | 37.0 | excluded |
| Toxic shock syndrome toxin-1                               | P06886 | <i>tst</i>  | FEYNTEKPPINIDEIK         | 650.670 | 941.530  | 17.35 | 37.0 | excluded |
| Toxic shock syndrome toxin-1                               | P06886 | <i>tst</i>  | HQLTQIHGLYR              | 683.370 | 645.350  | 12.59 | 35.0 | excluded |
| Toxic shock syndrome toxin-1                               | P06886 | <i>tst</i>  | HQLTQIHGLYR              | 683.370 | 987.540  | 12.59 | 35.0 | excluded |
| Toxic shock syndrome toxin-1                               | P06886 | <i>tst</i>  | HQLTQIHGLYR              | 683.370 | 1100.620 | 12.59 | 35.0 | excluded |
| Toxic shock syndrome toxin-1                               | P06886 | <i>tst</i>  | IKNTDGSISLIIFPSPYYSPAFTK | 887.140 | 537.270  | 22.89 | 48.0 | excluded |
| Toxic shock syndrome toxin-1                               | P06886 | <i>tst</i>  | IKNTDGSISLIIFPSPYYSPAFTK | 887.140 | 563.320  | 22.89 | 48.0 | excluded |
| Toxic shock syndrome toxin-1                               | P06886 | <i>tst</i>  | IKNTDGSISLIIFPSPYYSPAFTK | 887.140 | 1073.530 | 22.89 | 48.0 | excluded |

|   |                              |        |            |                 |         |          |       |      |           |
|---|------------------------------|--------|------------|-----------------|---------|----------|-------|------|-----------|
|   | Toxic shock syndrome toxin-1 | P06886 | <i>tst</i> | ITMNDGSTYQSDLSK | 830.380 | 549.290  | 12.60 | 42.0 | excluded  |
|   | Toxic shock syndrome toxin-1 | P06886 | <i>tst</i> | ITMNDGSTYQSDLSK | 830.380 | 941.460  | 12.60 | 42.0 | excluded  |
|   | Toxic shock syndrome toxin-1 | P06886 | <i>tst</i> | ITMNDGSTYQSDLSK | 830.380 | 1085.510 | 12.60 | 42.0 | excluded  |
|   | Toxic shock syndrome toxin-1 | P06886 | <i>tst</i> | KQLAISTLDFEIR   | 767.440 | 564.310  | 19.36 | 39.0 | excluded  |
|   | Toxic shock syndrome toxin-1 | P06886 | <i>tst</i> | KQLAISTLDFEIR   | 767.440 | 980.500  | 19.36 | 39.0 | excluded  |
|   | Toxic shock syndrome toxin-1 | P06886 | <i>tst</i> | KQLAISTLDFEIR   | 767.440 | 1093.590 | 19.36 | 39.0 | excluded  |
| V | Toxic shock syndrome toxin-1 | P06886 | <i>tst</i> | LPTPIELPLK      | 560.850 | 405.260  | 19.60 | 30.0 | conserved |
| V | Toxic shock syndrome toxin-1 | P06886 | <i>tst</i> | LPTPIELPLK      | 560.850 | 809.510  | 19.60 | 30.0 | conserved |
| V | Toxic shock syndrome toxin-1 | P06886 | <i>tst</i> | LPTPIELPLK      | 560.850 | 910.560  | 19.60 | 30.0 | conserved |
|   | Toxic shock syndrome toxin-1 | P06886 | <i>tst</i> | LPTPIELPLKVK    | 674.430 | 518.840  | 19.20 | 35.0 | excluded  |
|   | Toxic shock syndrome toxin-1 | P06886 | <i>tst</i> | LPTPIELPLKVK    | 674.430 | 617.890  | 19.20 | 35.0 | excluded  |

|                              |        |     |                         |         |          |       |      |          |
|------------------------------|--------|-----|-------------------------|---------|----------|-------|------|----------|
| Toxic shock syndrome toxin-1 | P06886 | tst | LPTPIELPLKVK            | 674.430 | 1036.680 | 19.20 | 35.0 | excluded |
| Toxic shock syndrome toxin-1 | P06886 | tst | NTDGSISLIIFSPYSPAFTK    | 806.750 | 537.270  | 23.98 | 40.0 | excluded |
| Toxic shock syndrome toxin-1 | P06886 | tst | NTDGSISLIIFSPYSPAFTK    | 806.750 | 563.320  | 23.98 | 40.0 | excluded |
| Toxic shock syndrome toxin-1 | P06886 | tst | NTDGSISLIIFSPYSPAFTK    | 806.750 | 1073.530 | 23.98 | 40.0 | excluded |
| Toxic shock syndrome toxin-1 | P06886 | tst | NTDGSISLIIFSPYSPAFTKGEK | 911.470 | 694.350  | 22.57 | 45.0 | excluded |
| Toxic shock syndrome toxin-1 | P06886 | tst | NTDGSISLIIFSPYSPAFTKGEK | 911.470 | 786.390  | 22.57 | 45.0 | excluded |
| Toxic shock syndrome toxin-1 | P06886 | tst | NTDGSISLIIFSPYSPAFTKGEK | 911.470 | 859.920  | 22.57 | 45.0 | excluded |
| Toxic shock syndrome toxin-1 | P06886 | tst | QLAISTLDFEIR            | 703.390 | 564.310  | 21.14 | 36.0 | excluded |
| Toxic shock syndrome toxin-1 | P06886 | tst | QLAISTLDFEIR            | 703.390 | 893.470  | 21.14 | 36.0 | excluded |
| Toxic shock syndrome toxin-1 | P06886 | tst | QLAISTLDFEIR            | 703.390 | 980.500  | 21.14 | 36.0 | excluded |
| Toxic shock syndrome toxin-1 | P06886 | tst | SSDKTGGYWK              | 564.770 | 610.300  | 10.10 | 30.0 | excluded |

|                              |        |     |            |         |         |       |      |          |
|------------------------------|--------|-----|------------|---------|---------|-------|------|----------|
| Toxic shock syndrome toxin-1 | P06886 | tst | SSDKTGGYWK | 564.770 | 711.350 | 10.10 | 30.0 | excluded |
| Toxic shock syndrome toxin-1 | P06886 | tst | SSDKTGGYWK | 564.770 | 954.470 | 10.10 | 30.0 | excluded |
| Toxic shock syndrome toxin-1 | P06886 | tst | TGGYWK     | 356.180 | 496.300 | 10.71 | 21.0 | excluded |
| Toxic shock syndrome toxin-1 | P06886 | tst | TGGYWK     | 356.180 | 553.280 | 10.71 | 21.0 | excluded |
| Toxic shock syndrome toxin-1 | P06886 | tst | TGGYWK     | 356.180 | 610.300 | 10.71 | 21.0 | excluded |
| Toxic shock syndrome toxin-1 | P06886 | tst | TIEAEIN    | 395.200 | 415.220 | 12.54 | 22.0 | excluded |
| Toxic shock syndrome toxin-1 | P06886 | tst | TIEAEIN    | 395.200 | 526.250 | 12.54 | 22.0 | excluded |
| Toxic shock syndrome toxin-1 | P06886 | tst | TIEAEIN    | 395.200 | 544.260 | 12.54 | 22.0 | excluded |
| Toxic shock syndrome toxin-1 | P06886 | tst | VDLNTK     | 345.190 | 362.200 | 8.77  | 20.0 | excluded |
| Toxic shock syndrome toxin-1 | P06886 | tst | VDLNTK     | 345.190 | 475.290 | 8.77  | 20.0 | excluded |
| Toxic shock syndrome toxin-1 | P06886 | tst | VDLNTK     | 345.190 | 590.310 | 8.77  | 20.0 | excluded |

|                              |        |            |         |         |         |      |      |          |
|------------------------------|--------|------------|---------|---------|---------|------|------|----------|
| Toxic shock syndrome toxin-1 | P06886 | <i>tst</i> | VDLNTKR | 423.250 | 518.300 | 8.11 | 24.0 | excluded |
| Toxic shock syndrome toxin-1 | P06886 | <i>tst</i> | VDLNTKR | 423.250 | 631.390 | 8.11 | 24.0 | excluded |
| Toxic shock syndrome toxin-1 | P06886 | <i>tst</i> | VDLNTKR | 423.250 | 746.420 | 8.11 | 24.0 | excluded |

Q1 (m/z): mass-to-charge ratio for the peptide ion used as Q1 value; Q3 m/z: mass-to-charge ratio for the fragment ion used as Q3 value.

<sup>a</sup>undetected, heavy or incongruous transitions were excluded based on train set analysis.

<sup>b</sup>Penicillin binding protein 2 prime stands for Penicillin Binding Protein 2 a (PBP2a), encoded by *mecA*<sup>c</sup> gene.

<sup>c</sup>according to Ito *et al.*<sup>1</sup>.

<sup>d</sup>Beta-lactam-inducible penicillin-binding protein stands for Penicillin Binding Protein 2 c (PBP2c), encoded by *mecC*<sup>c</sup> gene.

<sup>e</sup>peptide FQITTSPGSTQK is shared by PBP2a and PBP2c encoded, respectively, by the *mecA* and *mecC* genes. This peptide was used to detect both proteins.

To facilitate the table reading, transitions contributing to a given feature (cf. column 1) have been highlighted by different colours:

- in green : I-feature;
- in orange: R-feature for PBP2a;
- in pink : R-feature for PBP2c;
- in grey: T-feature for Protein A;
- in dark blue: V-feature for PVL;
- in light blue: V-feature for TSST-1.

**Supplementary Table 2: Datasets characterisation using reference methods****Supplementary Table 2a: Train set characterisation**

| Sample name | Species <sup>a</sup>                | <i>mecA</i> <sup>b</sup> | <i>mecC</i> <sup>b</sup> | <i>lukS lukF</i> <sup>b</sup> | <i>tst</i> <sup>b</sup> |
|-------------|-------------------------------------|--------------------------|--------------------------|-------------------------------|-------------------------|
| Strain_001  | <i>Staphylococcus aureus</i>        | -                        | -                        | +                             | -                       |
| Strain_003  | <i>Staphylococcus haemolyticus</i>  | +                        | -                        | -                             | -                       |
| Strain_005  | <i>Staphylococcus aureus</i>        | -                        | -                        | -                             | -                       |
| Strain_006  | <i>Staphylococcus simulans</i>      | +                        | -                        | -                             | -                       |
| Strain_007  | <i>Staphylococcus aureus</i>        | +                        | -                        | -                             | -                       |
| Strain_009  | <i>Staphylococcus aureus</i>        | -                        | -                        | +                             | -                       |
| Strain_010  | <i>Staphylococcus capitis</i>       | -                        | -                        | -                             | -                       |
| Strain_012  | <i>Staphylococcus saprophyticus</i> | +                        | -                        | -                             | -                       |
| Strain_014  | <i>Staphylococcus epidermidis</i>   | +                        | -                        | -                             | -                       |
| Strain_015  | <i>Staphylococcus aureus</i>        | +                        | -                        | -                             | -                       |
| Strain_019  | <i>Staphylococcus aureus</i>        | -                        | -                        | -                             | -                       |
| Strain_020  | <i>Staphylococcus hominis</i>       | +                        | -                        | -                             | -                       |
| Strain_023  | <i>Staphylococcus aureus</i>        | +                        | -                        | -                             | -                       |
| Strain_024  | <i>Staphylococcus aureus</i>        | +                        | -                        | -                             | -                       |
| Strain_027  | <i>Staphylococcus aureus</i>        | -                        | -                        | -                             | -                       |
| Strain_029  | <i>Staphylococcus aureus</i>        | +                        | -                        | -                             | -                       |
| Strain_031  | <i>Staphylococcus aureus</i>        | +                        | -                        | -                             | -                       |
| Strain_033  | <i>Staphylococcus haemolyticus</i>  | -                        | -                        | -                             | -                       |
| Strain_041  | <i>Staphylococcus aureus</i>        | +                        | -                        | -                             | -                       |
| Strain_043  | <i>Staphylococcus aureus</i>        | +                        | -                        | -                             | -                       |
| Strain_044  | <i>Staphylococcus epidermidis</i>   | -                        | -                        | -                             | -                       |
| Strain_046  | <i>Staphylococcus saprophyticus</i> | -                        | -                        | -                             | -                       |
| Strain_047  | <i>Staphylococcus aureus</i>        | -                        | -                        | -                             | -                       |

|            |                              |   |   |   |   |
|------------|------------------------------|---|---|---|---|
| Strain_049 | <i>Staphylococcus aureus</i> | - | - | + | - |
| Strain_051 | <i>Staphylococcus aureus</i> | - | + | - | - |
| Strain_052 | <i>Staphylococcus aureus</i> | - | + | - | - |
| Strain_053 | <i>Staphylococcus aureus</i> | - | + | - | - |
| Strain_054 | <i>Staphylococcus aureus</i> | - | + | - | - |
| Strain_055 | <i>Staphylococcus aureus</i> | - | + | - | + |
| Strain_056 | <i>Staphylococcus aureus</i> | - | + | - | - |
| Strain_057 | <i>Staphylococcus aureus</i> | - | + | - | - |
| Strain_058 | <i>Staphylococcus aureus</i> | - | + | - | - |
| Strain_087 | <i>Staphylococcus aureus</i> | - | - | + | - |
| Strain_088 | <i>Staphylococcus aureus</i> | + | - | + | - |
| Strain_089 | <i>Staphylococcus aureus</i> | + | - | + | - |
| Strain_090 | <i>Staphylococcus aureus</i> | - | - | + | - |
| Strain_091 | <i>Staphylococcus aureus</i> | - | - | + | - |
| Strain_092 | <i>Staphylococcus aureus</i> | + | - | + | - |

<sup>a</sup>Species were identified by biochemical methods using VITEK2<sup>®</sup> instrument.

<sup>b</sup>*mecA*, *mecC*, *lukF*, *lukS* and *tst* genes were detected by PCR (see **Online methods**).



**Supplementary Table 2b: Test set characterisation**

| Sample name | Species <sup>a</sup>               | <i>mecA</i> <sup>b</sup> | <i>mecC</i> <sup>b</sup> | <i>lukS lukF</i> <sup>b</sup> | <i>tst</i> <sup>b</sup> |
|-------------|------------------------------------|--------------------------|--------------------------|-------------------------------|-------------------------|
| Strain_004  | <i>Staphylococcus haemolyticus</i> | +                        | -                        | -                             | -                       |
| Strain_008  | <i>Staphylococcus aureus</i>       | +                        | -                        | -                             | -                       |
| Strain_011  | <i>Staphylococcus aureus</i>       | -                        | -                        | -                             | -                       |
| Strain_016  | <i>Staphylococcus aureus</i>       | -                        | -                        | -                             | -                       |
| Strain_017  | <i>Staphylococcus aureus</i>       | +                        | -                        | -                             | -                       |
| Strain_018  | <i>Staphylococcus simulans</i>     | +                        | -                        | -                             | -                       |
| Strain_021  | <i>Staphylococcus capitis</i>      | +                        | -                        | -                             | -                       |
| Strain_022  | <i>Staphylococcus aureus</i>       | -                        | -                        | -                             | +                       |
| Strain_025  | <i>Staphylococcus aureus</i>       | -                        | -                        | -                             | +                       |
| Strain_026  | <i>Staphylococcus aureus</i>       | +                        | -                        | -                             | -                       |
| Strain_028  | <i>Staphylococcus hominis</i>      | +                        | -                        | -                             | -                       |
| Strain_030  | <i>Staphylococcus aureus</i>       | -                        | -                        | -                             | -                       |
| Strain_032  | <i>Staphylococcus aureus</i>       | +                        | -                        | -                             | -                       |
| Strain_034  | <i>Staphylococcus epidermidis</i>  | +                        | -                        | -                             | -                       |
| Strain_035  | <i>Staphylococcus warneri</i>      | -                        | -                        | -                             | -                       |
| Strain_037  | <i>Staphylococcus warneri</i>      | -                        | -                        | -                             | -                       |
| Strain_038  | <i>Staphylococcus aureus</i>       | -                        | -                        | -                             | -                       |
| Strain_039  | <i>Staphylococcus aureus</i>       | +                        | -                        | -                             | -                       |
| Strain_040  | <i>Staphylococcus hominis</i>      | -                        | -                        | -                             | -                       |
| Strain_042  | <i>Staphylococcus aureus</i>       | +                        | -                        | -                             | -                       |
| Strain_045  | <i>Staphylococcus simulans</i>     | -                        | -                        | -                             | -                       |
| Strain_048  | <i>Staphylococcus aureus</i>       | -                        | -                        | -                             | -                       |
| Strain_050  | <i>Staphylococcus aureus</i>       | -                        | -                        | +                             | +                       |
| Strain_059  | <i>Staphylococcus aureus</i>       | -                        | +                        | -                             | +                       |
| Strain_060  | <i>Staphylococcus aureus</i>       | -                        | +                        | -                             | -                       |
| Strain_061  | <i>Staphylococcus aureus</i>       | -                        | +                        | -                             | -                       |
| Strain_062  | <i>Staphylococcus aureus</i>       | -                        | +                        | -                             | -                       |
| Strain_063  | <i>Staphylococcus aureus</i>       | -                        | +                        | -                             | -                       |
| Strain_064  | <i>Staphylococcus aureus</i>       | -                        | +                        | -                             | -                       |
| Strain_065  | <i>Staphylococcus aureus</i>       | -                        | +                        | -                             | -                       |
| Strain_066  | <i>Staphylococcus aureus</i>       | -                        | +                        | -                             | -                       |
| Strain_093  | <i>Staphylococcus aureus</i>       | +                        | -                        | +                             | -                       |
| Strain_094  | <i>Staphylococcus aureus</i>       | -                        | -                        | +                             | -                       |
| Strain_095  | <i>Staphylococcus aureus</i>       | +                        | -                        | +                             | +                       |
| Strain_096  | <i>Staphylococcus aureus</i>       | +                        | -                        | +                             | -                       |
| Strain_097  | <i>Staphylococcus aureus</i>       | -                        | -                        | +                             | -                       |
| Strain_098  | <i>Staphylococcus aureus</i>       | -                        | -                        | +                             | -                       |
| Strain_100  | <i>Staphylococcus aureus</i>       | -                        | -                        | +                             | +                       |

<sup>a</sup>Species were identified by biochemical methods using VITEK2<sup>®</sup> instrument.

<sup>b</sup>*mecA*, *mecC*, *lukF*, *lukS* and *tst* genes were detected by PCR (see **Online methods**).

**Supplementary Table 2c: characteristics of Staphylococcus aureus blind evaluation set 1**

| Sample name | NRC <sup>a</sup> number | Agr group <sup>b</sup> | CC or ST <sup>c</sup> | <i>spa</i> type <sup>d</sup> | <i>mecA</i> <sup>e</sup> | <i>mecC</i> <sup>e</sup> | <i>lukS lukF</i> <sup>e</sup> | <i>tst</i> <sup>e</sup> | Strains features                                       | Reference |
|-------------|-------------------------|------------------------|-----------------------|------------------------------|--------------------------|--------------------------|-------------------------------|-------------------------|--------------------------------------------------------|-----------|
| Strain_067  | HT 2002 0209            | 3                      | ST80                  | t044                         | +                        | -                        | +                             | -                       | European CA-MRSA <sup>f</sup> clone                    | 2         |
| Strain_068  | LUG 1800                | 3                      | ST80                  | t376                         | +                        | -                        | -                             | -                       | $\Delta$ <i>pvl</i> derivative of HT 2002 0209         | 3         |
| Strain_069  | HT 2005 0374            | 3                      | ST80                  | t934                         | -                        | -                        | +                             | -                       | ST80 <i>pvl</i> <sup>+</sup> MSSA <sup>g</sup> clone   | 4         |
| Strain_070  | HT 2003 0539            | 2                      | ST5                   | t450                         | +                        | -                        | +                             | -                       | /                                                      | 4         |
| Strain_071  | HT 2003 0749            | 2                      | ST5                   | t242                         | +                        | -                        | -                             | +                       | MRSA <sup>h</sup> Geraldine clone                      | 5         |
| Strain_072  | HT 2006 1141            | 2                      | ST5                   | t242                         | +                        | -                        | -                             | -                       | $\Delta$ <i>tst</i> derivative of HT2003 0749)         | This work |
| Strain_073  | HT 2004 0012            | 1                      | ST8                   | t008                         | +                        | -                        | -                             | -                       | HA-MRSA <sup>i</sup> Lyon clone                        | 5         |
| Strain_074  | ST 2009 0070            | 1                      | ST8                   | t008                         | +                        | -                        | +                             | -                       | CA-MRSA USA 300 clone                                  | 6         |
| Strain_075  | HT 2007 0139            | 3                      | CC30                  | t012                         | -                        | -                        | -                             | +                       | CC30 MSSA lineage                                      | 7         |
| Strain_076  | ST 2009 0428            | 1                      | ST398                 | 11                           | +                        | -                        | -                             | -                       | ST398 MRSA from a pig infection                        | 8         |
| Strain_077  | LY 1999 0171            | 1                      | ST398                 | t571                         | -                        | -                        | +                             | -                       | ST398 MSSA from human infection                        | 8         |
| Strain_078  | ST 2011 0820            | 3                      | ST1945                | t843                         | -                        | +                        | -                             | -                       | <i>mecC</i> positive strain from human articular fluid | 9         |
| Strain_079  | ST 2011 1100            | 3                      | ST130                 | t843                         | -                        | +                        | -                             | -                       | <i>mecC</i> positive strain from cow milk infection    | 9         |
| Strain_080  | ST 2011 1307            | 4                      | CC121                 | ND <sup>j</sup>              | -                        | -                        | -                             | -                       | /                                                      | 7         |
| Strain_081  | ST 2010 1105            | 2                      | ST5                   | 2                            | +                        | -                        | -                             | +                       | HA-MRSA New York Japon clone                           | 10        |
| Strain_082  | ST 2011 1020            | 1                      | ST239                 | 30                           | +                        | -                        | -                             | -                       | HA-MRSA Hungarian and Brazilian clone                  | 10        |
| Strain_083  | HT 2006 1122            | 2                      | CC5                   | 2                            | +                        | -                        | -                             | -                       | HA-MRSA Pediatric clone                                | 10        |
| Strain_084  | ST 2010 0143            | 1                      | CC22                  | 32                           | +                        | -                        | -                             | -                       | UK MRSA15 clone                                        | 11        |
| Strain_085  | ST 2010 1055            | 3                      | CC36                  | 12                           | +                        | -                        | -                             | +                       | UK MRSA16 clone                                        | 10        |
| Strain_086  | ST 2010 1992            | 1                      | CC45                  | 4                            | +                        | -                        | -                             | -                       | HA-MRSA Berlin clone                                   | 12        |

<sup>a</sup>NRC number: strain number in French National Reference Center (NRC) of staphylococci.

<sup>b</sup>*Agr group*: allele of accessory gene regulator (*Agr*) system.

<sup>c</sup>CC or ST: clonal complex (CC) or sequence type (ST) according to multilocus sequence typing (MLST) scheme as previously described<sup>13</sup>.

<sup>d</sup>*spa* type: type of A protein according to molecular typing methods using gene encoding A protein (*spa*) polymorphisms<sup>14</sup>.

<sup>e</sup>*mecA* and *mecC* encoding methicillin resistance, *lukF* and *lukS* genes encoding Panton Valentine Leukocidin and *tst* genes encoding Toxic Shock Syndrome Toxin 1 were detected by DNA microarrays as previously described<sup>7</sup>.

<sup>f</sup>CA-MRSA: Community-Acquired Methicillin Resistant *Staphylococcus aureus*.

<sup>g</sup>MSSA: Methicillin Sensitive *Staphylococcus aureus*.

<sup>h</sup>MRSA: Methicillin Resistant *Staphylococcus aureus*.

<sup>i</sup>HA-MRSA: Hospital-Acquired Methicillin Resistant *Staphylococcus aureus*.

ND: not determined.

Results were given after SRMSRM analysis and interpretation

**Supplementary Table 2d: characteristics of Staphylococcus aureus blind evaluation set 2**

| Sample name | NRC<br>reference <sup>a</sup> | Agr<br>group <sup>b</sup> | CC <sup>c</sup> | <i>mecA</i> <sup>d</sup> | <i>mecC</i> <sup>d</sup> | <i>lukS, lukF</i> <sup>d</sup> | <i>tst</i> <sup>d</sup> |
|-------------|-------------------------------|---------------------------|-----------------|--------------------------|--------------------------|--------------------------------|-------------------------|
| Sample_101  | ST 2012 0564                  | 1                         | CC8             | -                        | -                        | -                              | -                       |
| Sample_102  | ST 2012 0529                  | 1                         | CC22            | -                        | -                        | -                              | -                       |
| Sample_103  | ST 2012 0572                  | 3                         | CC1             | -                        | -                        | -                              | -                       |
| Sample_104  | ST 2012 0523                  | 1                         | CC20            | -                        | -                        | -                              | -                       |
| Sample_105  | ST 2012 0644                  | 1                         | CC7             | -                        | -                        | -                              | -                       |
| Sample_106  | ST 2012 0566                  | 1                         | CC398           | -                        | -                        | -                              | -                       |
| Sample_107  | ST 2012 0536                  | 1                         | CC8             | +                        | -                        | -                              | -                       |
| Sample_108  | ST 2012 0533                  | 1                         | CC20            | -                        | -                        | -                              | -                       |
| Sample_109  | ST 2012 0632                  | 2                         | CC5             | -                        | -                        | -                              | -                       |
| Sample_110  | ST 2012 0641                  | 2                         | CC5             | -                        | -                        | -                              | -                       |
| Sample_111  | ST 2012 1044                  | 2                         | CC9             | -                        | -                        | -                              | -                       |
| Sample_112  | ST 2012 0520                  | 1                         | CC8             | -                        | -                        | -                              | -                       |
| Sample_113  | ST 2012 0555                  | 1                         | CC8             | -                        | -                        | -                              | -                       |
| Sample_114  | ST 2012 0586                  | 1                         | CC188           | -                        | -                        | -                              | -                       |

<sup>a</sup>NRC reference: strain reference in French National Reference Center (NRC) of staphylococci.

<sup>b</sup>*Agr group*: allele of accessory gene regulator (Agr) system.

<sup>c</sup>CC or ST: clonal complex (CC) or sequence type (ST) were assigned by DNA microarrays as previously described.

<sup>d</sup>*mecA* and *mecC* encoding methicillin resistance, *lukF* and *lukS* genes encoding Pantone Valentine Leukocidin and *tst* genes encoding Toxic Shock Syndrome Toxin 1 were detected by DNA microarrays as previously described<sup>7</sup>.

*Staphylococcus aureus* was identified by WC-MALDI-TOF using VITEK-MS<sup>®</sup> instrument. Results were given after SRM analysis and interpretation.

**Supplementary Table 2e: repeat set characterisation**

| Sample name  | Number of repeat assay | Species <sup>a</sup>          | <i>mecA</i> <sup>b</sup> | <i>mecC</i> <sup>b</sup> | <i>lukS</i> ,<br><i>lukF</i> <sup>b</sup> | <i>tst</i> <sup>b</sup> |
|--------------|------------------------|-------------------------------|--------------------------|--------------------------|-------------------------------------------|-------------------------|
| Strain_010_1 | 1                      | <i>Staphylococcus capitis</i> | -                        | -                        | -                                         | -                       |
| Strain_010_2 | 2                      | <i>Staphylococcus capitis</i> | -                        | -                        | -                                         | -                       |
| Strain_024_1 | 1                      | <i>Staphylococcus aureus</i>  | +                        | -                        | -                                         | -                       |
| Strain_024_2 | 2                      | <i>Staphylococcus aureus</i>  | +                        | -                        | -                                         | -                       |
| Strain_067_1 | 1                      | <i>Staphylococcus aureus</i>  | +                        | -                        | +                                         | -                       |
| Strain_067_2 | 2                      | <i>Staphylococcus aureus</i>  | +                        | -                        | +                                         | -                       |
| Strain_067_3 | 3                      | <i>Staphylococcus aureus</i>  | +                        | -                        | +                                         | -                       |
| Strain_070_1 | 1                      | <i>Staphylococcus aureus</i>  | +                        | -                        | +                                         | -                       |
| Strain_070_2 | 2                      | <i>Staphylococcus aureus</i>  | +                        | -                        | +                                         | -                       |
| Strain_070_3 | 3                      | <i>Staphylococcus aureus</i>  | +                        | -                        | +                                         | -                       |
| Strain_071_1 | 1                      | <i>Staphylococcus aureus</i>  | +                        | -                        | -                                         | +                       |
| Strain_071_2 | 2                      | <i>Staphylococcus aureus</i>  | +                        | -                        | -                                         | +                       |
| Strain_071_3 | 3                      | <i>Staphylococcus aureus</i>  | +                        | -                        | -                                         | +                       |
| Strain_075_1 | 1                      | <i>Staphylococcus aureus</i>  | -                        | -                        | -                                         | +                       |
| Strain_075_2 | 2                      | <i>Staphylococcus aureus</i>  | -                        | -                        | -                                         | +                       |
| Strain_075_3 | 3                      | <i>Staphylococcus aureus</i>  | -                        | -                        | -                                         | +                       |
| Strain_077_1 | 1                      | <i>Staphylococcus aureus</i>  | -                        | -                        | +                                         | -                       |
| Strain_077_2 | 2                      | <i>Staphylococcus aureus</i>  | -                        | -                        | +                                         | -                       |
| Strain_077_3 | 3                      | <i>Staphylococcus aureus</i>  | -                        | -                        | +                                         | -                       |
| Strain_078_1 | 1                      | <i>Staphylococcus aureus</i>  | -                        | +                        | -                                         | -                       |
| Strain_078_2 | 2                      | <i>Staphylococcus aureus</i>  | -                        | +                        | -                                         | -                       |
| Strain_078_3 | 3                      | <i>Staphylococcus aureus</i>  | -                        | +                        | -                                         | -                       |
| Strain_079_1 | 1                      | <i>Staphylococcus aureus</i>  | -                        | +                        | -                                         | -                       |
| Strain_079_2 | 2                      | <i>Staphylococcus aureus</i>  | -                        | +                        | -                                         | -                       |
| Strain_079_3 | 3                      | <i>Staphylococcus aureus</i>  | -                        | +                        | -                                         | -                       |
| Strain_080_1 | 1                      | <i>Staphylococcus aureus</i>  | -                        | -                        | -                                         | -                       |
| Strain_080_2 | 2                      | <i>Staphylococcus aureus</i>  | -                        | -                        | -                                         | -                       |
| Strain_080_3 | 3                      | <i>Staphylococcus aureus</i>  | -                        | -                        | -                                         | -                       |
| Strain_084_1 | 1                      | <i>Staphylococcus aureus</i>  | +                        | -                        | -                                         | -                       |
| Strain_084_2 | 2                      | <i>Staphylococcus aureus</i>  | +                        | -                        | -                                         | -                       |
| Strain_084_3 | 3                      | <i>Staphylococcus aureus</i>  | +                        | -                        | -                                         | -                       |
| Strain_085_1 | 1                      | <i>Staphylococcus aureus</i>  | +                        | -                        | -                                         | +                       |
| Strain_085_2 | 2                      | <i>Staphylococcus aureus</i>  | +                        | -                        | -                                         | +                       |
| Strain_085_3 | 3                      | <i>Staphylococcus aureus</i>  | +                        | -                        | -                                         | +                       |

<sup>a</sup>Species were assessed according to **Supplementary Table 2a and 2c**.

<sup>b</sup>*mecA* and *mecC* encoding methicillin resistance, *lukF* and *lukS* genes encoding Pantone Valentine Leukocidin and *tst* genes encoding toxic shock syndrome toxin were detected by PCR according to **Supplementary Table 2a and 2c**.

Results were given after SRM analysis and interpretation, except for both *Staphylococcus capitis* strains.

## Supplementary Table 3: Results

### Supplementary Table 3a: Train set results

| Sample name | I-peptides : <i>S. aureus</i> identification |            |               |              | R-peptides: PBP2a ( <i>mecA</i> product) <sup>b</sup> |            |               |              | R-peptides: PBP2a ( <i>mecC</i> product) <sup>d</sup> |            |               |              | V-peptides: PVL    |            |               |              | V-peptides: TSST   |            |               |              | MS versus molecular methods agreement <sup>e</sup> |
|-------------|----------------------------------------------|------------|---------------|--------------|-------------------------------------------------------|------------|---------------|--------------|-------------------------------------------------------|------------|---------------|--------------|--------------------|------------|---------------|--------------|--------------------|------------|---------------|--------------|----------------------------------------------------|
|             | 1/slope<br>1 ± 0,3                           | r<br>< 0,7 | Number<br>≤ 2 | MS<br>result | 1/slope<br>1 ± 0,3                                    | r<br>< 0,7 | Number<br>≤ 3 | MS<br>result | 1/slope<br>1 ± 0,3                                    | r<br>< 0,7 | Number<br>≤ 3 | MS<br>result | 1/slope<br>1 ± 0,3 | r<br>< 0,7 | Number<br>≤ 1 | MS<br>result | 1/slope<br>1 ± 0,1 | r<br>< 0,9 | Number<br>≤ 1 | MS<br>result |                                                    |
| Strain_001  | 1.008                                        | 0.998      | 9             | +            | 0.189                                                 | 0.230      | 3             | -            | 0.079                                                 | 0.073      | 1             | -            | 0.970              | 0.980      | 4             | +            | 0.000              | 0.000      | 0             | -            | Yes                                                |
| Strain_005  | 0.981                                        | 0.998      | 9             | +            | -0.018                                                | -0.030     | 2             | -            | 0.000                                                 | 0.000      | 0             | -            | 0.000              | 0.000      | 0             | -            | 0.000              | 0.000      | 0             | -            | Yes                                                |
| Strain_051  | 0.995                                        | 0.999      | 9             | +            | 0.101                                                 | 0.140      | 4             | -            | 1.056                                                 | 0.988      | 5             | +            | 0.000              | 0.000      | 0             | -            | 0.000              | 0.000      | 0             | -            | Yes                                                |
| Strain_052  | 0.973                                        | 0.997      | 8             | +            | 0.154                                                 | 0.222      | 2             | -            | 0.891                                                 | 0.990      | 3             | +            | 0.000              | 0.000      | 0             | -            | 0.000              | 0.000      | 0             | -            | Yes                                                |
| Strain_049  | 1.019                                        | 0.999      | 8             | +            | 0.214                                                 | 0.351      | 4             | -            | -1.104                                                | -0.602     | 1             | -            | 0.985              | 0.999      | 4             | +            | 0.000              | 0.000      | 0             | -            | Yes                                                |
| Strain_087  | 0.991                                        | 0.997      | 8             | +            | -0.036                                                | -0.078     | 1             | -            | 0.000                                                 | 0.000      | 0             | -            | 0.952              | 0.994      | 4             | +            | 0.000              | 0.000      | 0             | -            | Yes                                                |
| Strain_015  | 1.016                                        | 0.999      | 8             | +            | 0.979                                                 | 0.995      | 8             | +            | 0.634                                                 | 0.722      | 3             | -            | 0.000              | 0.000      | 0             | -            | 0.000              | 0.000      | 0             | -            | Yes                                                |
| Strain_007  | 0.990                                        | 0.996      | 9             | +            | 0.946                                                 | 0.996      | 8             | +            | 0.861                                                 | 0.995      | 1             | -            | 0.000              | 0.000      | 0             | -            | 0.000              | 0.000      | 0             | -            | Yes                                                |
| Strain_044  | 1.424                                        | 0.687      | 2             | -            | 0.581                                                 | 0.789      | 2             | -            | -0.578                                                | -1.000     | 1             | -            | 0.000              | 0.000      | 0             | -            | 0.000              | 0.000      | 0             | -            | Yes                                                |
| Strain_046  | 0.000                                        | 0.000      | 0             | -            | 0.000                                                 | 0.000      | 0             | -            | 0.000                                                 | 0.000      | 0             | -            | 0.000              | 0.000      | 0             | -            | 0.000              | 0.000      | 0             | -            | Yes                                                |
| Strain_009  | 1.006                                        | 0.999      | 9             | +            | -0.130                                                | -0.199     | 3             | -            | -0.898                                                | -0.659     | 1             | -            | 1.014              | 0.998      | 4             | +            | 0.000              | 0.000      | 0             | -            | Yes                                                |
| Strain_053  | 1.002                                        | 0.999      | 9             | +            | 0.345                                                 | 0.347      | 6             | -            | 1.059                                                 | 0.982      | 5             | +            | 0.000              | 0.000      | 0             | -            | 0.000              | 0.000      | 0             | -            | Yes                                                |
| Strain_054  | 0.961                                        | 0.998      | 8             | +            | 0.053                                                 | 0.090      | 3             | -            | 0.937                                                 | 0.998      | 3             | +            | 0.000              | 0.000      | 0             | -            | 0.000              | 0.000      | 0             | -            | Yes                                                |
| Strain_090  | 0.994                                        | 1.000      | 9             | +            | 0.179                                                 | 0.189      | 6             | -            | -0.402                                                | -0.763     | 3             | -            | 1.026              | 0.999      | 4             | +            | 0.000              | 0.000      | 0             | -            | Yes                                                |
| Strain_091  | 0.988                                        | 0.998      | 9             | +            | -0.076                                                | -0.133     | 2             | -            | 0.000                                                 | 0.000      | 0             | -            | 0.960              | 0.994      | 4             | +            | 0.000              | 0.000      | 0             | -            | Yes                                                |
| Strain_029  | 0.991                                        | 1.000      | 9             | +            | 0.994                                                 | 0.985      | 8             | +            | -0.129                                                | -0.254     | 3             | -            | 0.000              | 0.000      | 0             | -            | 0.000              | 0.000      | 0             | -            | Yes                                                |
| Strain_023  | 0.982                                        | 0.996      | 8             | +            | 0.948                                                 | 0.995      | 8             | +            | 0.866                                                 | 1.000      | 1             | -            | 0.000              | 0.000      | 0             | -            | 0.000              | 0.000      | 0             | -            | Yes                                                |
| Strain_003  | 0.000                                        | 0.000      | 0             | -            | 0.944                                                 | 0.994      | 8             | +            | 0.148                                                 | 0.181      | 2             | -            | 0.000              | 0.000      | 0             | -            | -0.082             | -0.125     | 1             | -            | Yes                                                |
| Strain_006  | 1.123                                        | 0.925      | 1             | -            | 0.989                                                 | 0.997      | 8             | +            | 0.466                                                 | 0.763      | 3             | -            | 0.000              | 0.000      | 0             | -            | 0.000              | 0.000      | 0             | -            | Yes                                                |
| Strain_010  | 0.000                                        | 0.000      | 0             | -            | 0.099                                                 | 0.318      | 3             | -            | 0.242                                                 | 0.361      | 2             | -            | 0.429              | 0.543      | 2             | -            | 0.000              | 0.000      | 0             | -            | Yes                                                |
| Strain_033  | 0.000                                        | 0.000      | 0             | -            | -0.137                                                | -0.316     | 1             | -            | -0.512                                                | -0.554     | 2             | -            | 0.000              | 0.000      | 0             | -            | -0.083             | -0.134     | 1             | -            | Yes                                                |
| Strain_019  | 1.006                                        | 1.000      | 9             | +            | 0.072                                                 | 0.078      | 7             | -            | -0.407                                                | -0.767     | 3             | -            | 0.000              | 0.000      | 0             | -            | 0.756              | 0.933      | 1             | -            | Yes                                                |
| Strain_024  | 1.005                                        | 0.999      | 9             | +            | 1.009                                                 | 0.996      | 8             | +            | -0.130                                                | -0.218     | 3             | -            | 0.000              | 0.000      | 0             | -            | 0.000              | 0.000      | 0             | -            | Yes                                                |
| Strain_055  | 0.997                                        | 0.999      | 9             | +            | 0.129                                                 | 0.162      | 6             | -            | 1.089                                                 | 0.933      | 5             | +            | 0.000              | 0.000      | 0             | -            | 1.000              | 1.000      | 1             | +            | Yes                                                |
| Strain_056  | 1.014                                        | 0.999      | 8             | +            | 0.025                                                 | 0.029      | 5             | -            | 0.998                                                 | 0.882      | 5             | +            | 0.000              | 0.000      | 0             | -            | 0.000              | 0.000      | 0             | -            | Yes                                                |
| Strain_088  | 0.999                                        | 0.999      | 9             | +            | 1.020                                                 | 0.998      | 8             | +            | 0.550                                                 | 0.524      | 2             | -            | 1.000              | 0.997      | 4             | +            | 0.730              | 0.895      | 1             | -            | Yes                                                |
| Strain_089  | 0.992                                        | 0.999      | 9             | +            | 1.021                                                 | 0.997      | 8             | +            | 0.457                                                 | 0.397      | 2             | -            | 1.017              | 0.995      | 4             | +            | 0.851              | 0.922      | 1             | -            | Yes                                                |
| Strain_041  | 0.996                                        | 0.999      | 9             | +            | 0.994                                                 | 0.995      | 8             | +            | 0.886                                                 | 0.827      | 2             | -            | 0.000              | 0.000      | 0             | -            | 0.000              | 0.000      | 0             | -            | Yes                                                |
| Strain_031  | 0.990                                        | 0.999      | 9             | +            | 1.005                                                 | 0.968      | 8             | +            | -0.156                                                | -0.257     | 2             | -            | 0.000              | 0.000      | 0             | -            | 0.538              | 0.595      | 1             | -            | Yes                                                |
| Strain_012  | 0.000                                        | 0.000      | 0             | -            | 0.733                                                 | 0.758      | 7             | +            | 0.253                                                 | 0.251      | 2             | -            | 0.000              | 0.000      | 0             | -            | 0.000              | 0.000      | 0             | -            | Yes                                                |
| Strain_014  | -2.191                                       | -0.908     | 1             | -            | 0.804                                                 | 0.895      | 7             | +            | 0.508                                                 | 0.632      | 2             | -            | 0.000              | 0.000      | 0             | -            | 0.000              | 0.000      | 0             | -            | Yes                                                |
| Strain_027  | 1.007                                        | 0.999      | 9             | +            | 0.152                                                 | 0.195      | 4             | -            | -0.430                                                | -0.643     | 3             | -            | 0.000              | 0.000      | 0             | -            | 0.000              | 0.000      | 0             | -            | Yes                                                |
| Strain_047  | 0.996                                        | 0.998      | 8             | +            | 0.048                                                 | 0.058      | 3             | -            | -0.519                                                | -0.707     | 3             | -            | 0.000              | 0.000      | 0             | -            | 0.000              | 0.000      | 0             | -            | Yes                                                |
| Strain_057  | 1.008                                        | 0.998      | 9             | +            | 0.012                                                 | 0.016      | 4             | -            | 0.944                                                 | 0.899      | 5             | +            | 0.000              | 0.000      | 0             | -            | 0.000              | 0.000      | 0             | -            | Yes                                                |
| Strain_058  | 1.010                                        | 0.999      | 9             | +            | 0.262                                                 | 0.360      | 5             | -            | 0.842                                                 | 0.836      | 5             | +            | 0.000              | 0.000      | 0             | -            | 0.000              | 0.000      | 0             | -            | Yes                                                |
| Strain_092  | 1.000                                        | 0.998      | 9             | +            | 1.031                                                 | 0.997      | 8             | +            | 0.595                                                 | 0.462      | 2             | -            | 0.968              | 0.993      | 4             | +            | 0.752              | 0.870      | 1             | -            | Yes                                                |
| Strain_043  | 1.000                                        | 0.998      | 9             | +            | 1.012                                                 | 0.995      | 8             | +            | 1.100                                                 | 0.983      | 1             | -            | 0.000              | 0.000      | 0             | -            | 0.724              | 0.815      | 1             | -            | Yes                                                |
| Strain_020  | 0.000                                        | 0.000      | 0             | -            | 0.938                                                 | 0.981      | 8             | +            | -0.049                                                | -0.053     | 3             | -            | 0.000              | 0.000      | 0             | -            | 0.000              | 0.000      | 0             | -            | Yes                                                |

<sup>a</sup>PBP2a: Penicillin Binding Protein 2 a, encoded by *mecA* gene.

<sup>b</sup>PBP2c: Penicillin Binding Protein 2 c, encoded by *mecC* gene.

<sup>c</sup>PVL: Panton Valentine Leukocidin.

<sup>d</sup>TSST-1: Toxic Shock Syndrome Toxin 1.

<sup>e</sup>Reference methods: full automated biochemical VITEK2® method for identification, PCR test for *mecA*, *mecC*, *lukF*, *lukS* and *tst* genes detection (see **Supplementary Table 2a**).

**Supplementary Table 3b: Test set results**

| Sample name | I-peptides : <i>S. aureus</i> identification |        |        |           | R-peptides: PBP2a ( <i>mecA</i> product) <sup>b</sup> |        |        |           | R-peptides: PBP2a ( <i>mecC</i> product) <sup>d</sup> |        |        |           | V-peptides: PVL |        |        |           | V-peptides: TSST |        |        |           | MS versus molecular methods agreement <sup>e</sup> |
|-------------|----------------------------------------------|--------|--------|-----------|-------------------------------------------------------|--------|--------|-----------|-------------------------------------------------------|--------|--------|-----------|-----------------|--------|--------|-----------|------------------|--------|--------|-----------|----------------------------------------------------|
|             | 1/slope                                      | r      | Number | MS result | 1/slope                                               | r      | Number | MS result | 1/slope                                               | r      | Number | MS result | 1/slope         | r      | Number | MS result | 1/slope          | r      | Number | MS result |                                                    |
|             | 1 ± 0,3                                      | < 0,7  | ≤ 2    |           | 1 ± 0,3                                               | < 0,7  | ≤ 3    |           | 1 ± 0,3                                               | < 0,7  | ≤ 3    |           | 1 ± 0,3         | < 0,7  | ≤ 1    |           | 1 ± 0,1          | < 0,9  | ≤ 1    |           |                                                    |
| Strain_035  | 0.000                                        | 0.000  | 0      | -         | 0.274                                                 | 0.566  | 3      | -         | 0.276                                                 | 0.214  | 2      | -         | 1.823           | 0.990  | 1      | -         | 0.000            | 0.000  | 0      | -         | Yes                                                |
| Strain_040  | -0.359                                       | -0.518 | 2      | -         | -0.009                                                | -0.011 | 5      | -         | -0.355                                                | -0.436 | 3      | -         | -0.990          | -0.944 | 1      | -         | 0.146            | 0.169  | 1      | -         | Yes                                                |
| Strain_011  | 1.006                                        | 0.997  | 9      | +         | 0.289                                                 | 0.421  | 4      | -         | -0.456                                                | -0.997 | 1      | -         | 0.000           | 0.000  | 0      | -         | 0.000            | 0.000  | 0      | -         | Yes                                                |
| Strain_016  | 1.038                                        | 0.994  | 9      | +         | 0.253                                                 | 0.379  | 4      | -         | -0.409                                                | -0.793 | 3      | -         | 0.000           | 0.000  | 0      | -         | -0.757           | -0.585 | 1      | -         | Yes                                                |
| Strain_060  | 1.041                                        | 0.994  | 9      | +         | 0.264                                                 | 0.325  | 5      | -         | 1.039                                                 | 0.983  | 5      | +         | 0.388           | 0.917  | 1      | -         | -0.423           | -0.670 | 1      | -         | Yes                                                |
| Strain_061  | 1.036                                        | 0.993  | 9      | +         | -0.036                                                | -0.041 | 6      | -         | 1.041                                                 | 0.982  | 5      | +         | 0.000           | 0.000  | 0      | -         | 0.000            | 0.000  | 0      | -         | Yes                                                |
| Strain_094  | 1.024                                        | 0.995  | 9      | +         | 0.198                                                 | 0.262  | 5      | -         | -0.598                                                | -0.755 | 3      | -         | 0.991           | 0.974  | 4      | +         | 1.687            | 0.902  | 1      | -         | Yes                                                |
| Strain_097  | 1.041                                        | 0.993  | 8      | +         | 0.241                                                 | 0.319  | 5      | -         | -0.361                                                | -0.820 | 2      | -         | 1.129           | 0.991  | 3      | +         | 0.000            | 0.000  | 0      | -         | Yes                                                |
| Strain_026  | 1.007                                        | 0.995  | 9      | +         | 0.945                                                 | 0.998  | 8      | +         | -0.149                                                | -0.279 | 3      | -         | 0.000           | 0.000  | 0      | -         | 0.935            | 0.868  | 1      | -         | Yes                                                |
| Strain_017  | 0.994                                        | 0.996  | 9      | +         | 0.257                                                 | 0.370  | 4      | -         | -0.358                                                | -0.988 | 2      | -         | 0.000           | 0.000  | 0      | -         | 0.953            | 0.976  | 1      | +         | Yes                                                |
| Strain_045  | 0.218                                        | 0.324  | 2      | -         | 0.213                                                 | 0.244  | 4      | -         | 0.519                                                 | 0.812  | 2      | -         | 0.571           | 0.730  | 2      | -         | 0.000            | 0.000  | 0      | -         | Yes                                                |
| Strain_004  | 0.000                                        | 0.000  | 0      | -         | 0.955                                                 | 0.993  | 8      | +         | -0.276                                                | -0.343 | 3      | -         | 0.567           | 0.790  | 1      | -         | -0.066           | -0.122 | 1      | -         | Yes                                                |
| Strain_022  | 1.020                                        | 0.995  | 9      | +         | 0.935                                                 | 0.996  | 8      | +         | -0.099                                                | -0.183 | 3      | -         | 0.000           | 0.000  | 0      | -         | 0.000            | 0.000  | 0      | -         | Yes                                                |
| Strain_025  | 1.003                                        | 0.995  | 9      | +         | 0.215                                                 | 0.303  | 5      | -         | -0.275                                                | -0.456 | 3      | -         | 0.000           | 0.000  | 0      | -         | 0.972            | 0.981  | 1      | +         | Yes                                                |
| Strain_062  | 1.024                                        | 0.993  | 9      | +         | 0.296                                                 | 0.432  | 6      | -         | 1.089                                                 | 0.894  | 5      | +         | 0.000           | 0.000  | 0      | -         | 0.000            | 0.000  | 0      | -         | Yes                                                |
| Strain_063  | 1.048                                        | 0.991  | 9      | +         | 0.187                                                 | 0.268  | 4      | -         | 0.941                                                 | 0.991  | 5      | +         | 0.000           | 0.000  | 0      | -         | 0.000            | 0.000  | 0      | -         | Yes                                                |
| Strain_098  | 1.029                                        | 0.996  | 8      | +         | 0.281                                                 | 0.439  | 4      | -         | -0.312                                                | -0.861 | 2      | -         | 0.872           | 0.971  | 4      | +         | 0.000            | 0.000  | 0      | -         | Yes                                                |
| Strain_093  | 1.041                                        | 0.993  | 8      | +         | 0.959                                                 | 0.996  | 8      | +         | -0.104                                                | -0.214 | 3      | -         | 0.973           | 0.990  | 4      | +         | 0.000            | 0.000  | 0      | -         | Yes                                                |
| Strain_039  | 1.019                                        | 0.995  | 9      | +         | 0.937                                                 | 0.992  | 8      | +         | -0.119                                                | -0.241 | 2      | -         | 0.000           | 0.000  | 0      | -         | 0.000            | 0.000  | 0      | -         | Yes                                                |
| Strain_032  | 1.030                                        | 0.995  | 9      | +         | 0.871                                                 | 0.928  | 8      | +         | -0.161                                                | -0.311 | 3      | -         | 0.000           | 0.000  | 0      | -         | 0.000            | 0.000  | 0      | -         | Yes                                                |
| Strain_018  | 0.061                                        | 0.052  | 3      | -         | 0.957                                                 | 0.997  | 8      | +         | 0.453                                                 | 0.718  | 4      | -         | 0.556           | 0.692  | 2      | -         | 0.000            | 0.000  | 0      | -         | Yes                                                |
| Strain_021  | 0.457                                        | 0.531  | 3      | -         | 0.933                                                 | 0.978  | 8      | +         | -0.311                                                | -0.418 | 4      | -         | -0.555          | -0.518 | 2      | -         | 0.000            | 0.000  | 0      | -         | Yes                                                |
| Strain_030  | 1.034                                        | 0.994  | 9      | +         | 0.279                                                 | 0.417  | 4      | -         | -0.481                                                | -0.828 | 3      | -         | 0.000           | 0.000  | 0      | -         | 0.000            | 0.000  | 0      | -         | Yes                                                |
| Strain_038  | 1.033                                        | 0.994  | 9      | +         | 0.086                                                 | 0.142  | 5      | -         | -0.349                                                | -0.994 | 2      | -         | -1.601          | -0.553 | 1      | -         | 0.000            | 0.000  | 0      | -         | Yes                                                |
| Strain_064  | 1.038                                        | 0.994  | 9      | +         | 0.308                                                 | 0.430  | 6      | -         | 1.038                                                 | 0.971  | 5      | +         | 0.000           | 0.000  | 0      | -         | 0.000            | 0.000  | 0      | -         | Yes                                                |
| Strain_065  | 1.034                                        | 0.995  | 9      | +         | 0.308                                                 | 0.430  | 5      | -         | 0.979                                                 | 0.976  | 5      | +         | 0.000           | 0.000  | 0      | -         | 0.000            | 0.000  | 0      | -         | Yes                                                |
| Strain_095  | 1.019                                        | 0.994  | 9      | +         | 0.932                                                 | 0.995  | 8      | +         | -0.133                                                | -0.261 | 3      | -         | 0.920           | 0.983  | 4      | +         | 0.000            | 0.000  | 0      | -         | No TSST-1 issue <sup>i</sup>                       |
| Strain_096  | 1.029                                        | 0.994  | 9      | +         | 0.940                                                 | 0.995  | 8      | +         | 0.151                                                 | 0.179  | 3      | -         | 1.003           | 0.988  | 4      | +         | 0.000            | 0.000  | 0      | -         | Yes                                                |
| Strain_042  | 1.027                                        | 0.982  | 9      | +         | 0.939                                                 | 0.995  | 8      | +         | -0.124                                                | -0.230 | 3      | -         | 0.000           | 0.000  | 0      | -         | 1.065            | 0.870  | 1      | -         | Yes                                                |
| Strain_028  | 1.175                                        | 0.945  | 1      | -         | 0.764                                                 | 0.823  | 7      | +         | 0.386                                                 | 0.545  | 2      | -         | -0.303          | -0.278 | 1      | -         | 0.000            | 0.000  | 0      | -         | Yes                                                |
| Strain_034  | 0.000                                        | 0.000  | 0      | -         | 0.919                                                 | 0.965  | 8      | +         | -0.253                                                | -0.347 | 4      | -         | 0.000           | 0.000  | 0      | -         | 0.000            | 0.000  | 0      | -         | Yes                                                |
| Strain_048  | 1.032                                        | 0.997  | 8      | +         | 0.098                                                 | 0.155  | 5      | -         | -0.503                                                | -0.781 | 3      | -         | 0.000           | 0.000  | 0      | -         | 0.000            | 0.000  | 0      | -         | Yes                                                |
| Strain_059  | 1.034                                        | 0.912  | 9      | +         | 0.227                                                 | 0.344  | 5      | -         | 1.013                                                 | 0.954  | 5      | +         | 0.000           | 0.000  | 0      | -         | 0.973            | 0.980  | 1      | +         | Yes                                                |
| Strain_066  | 1.039                                        | 0.994  | 9      | +         | 0.047                                                 | 0.044  | 5      | -         | 1.077                                                 | 0.986  | 5      | +         | 0.000           | 0.000  | 0      | -         | -0.120           | -0.096 | 1      | -         | Yes                                                |
| Strain_050  | 1.003                                        | 0.958  | 9      | +         | 0.289                                                 | 0.378  | 5      | -         | 0.054                                                 | 0.076  | 3      | -         | 0.953           | 0.991  | 4      | +         | 0.961            | 0.981  | 1      | +         | Yes                                                |
| Strain_008  | 1.011                                        | 0.995  | 9      | +         | 0.928                                                 | 0.997  | 8      | +         | 0.073                                                 | 0.108  | 3      | -         | 0.000           | 0.000  | 0      | -         | 0.000            | 0.000  | 0      | -         | Yes                                                |
| Strain_100  | 1.002                                        | 0.965  | 9      | +         | 0.242                                                 | 0.344  | 6      | -         | -0.168                                                | -0.312 | 3      | -         | 0.909           | 0.968  | 4      | +         | 0.976            | 0.971  | 1      | +         | Yes                                                |
| Strain_037  | 0.000                                        | 0.000  | 0      | -         | 0.604                                                 | 0.752  | 2      | -         | -0.990                                                | -0.706 | 2      | -         | 0.408           | 0.468  | 2      | -         | 0.000            | 0.000  | 0      | -         | Yes                                                |



<sup>a</sup>PBP2a: Penicillin Binding Protein 2 a, encoded by *mecA* gene.

<sup>b</sup>PBP2c: Penicillin Binding Protein 2 c, encoded by *mecC* gene.

<sup>c</sup>PVL: Panton Valentine Leukocidin.

<sup>d</sup>TSST-1: Toxic Shock Syndrome Toxin 1.

<sup>e</sup>Reference methods: full automated biochemical VITEK2<sup>®</sup> method for identification, PCR test for *mecA*, *mecC*, *lukF*, *lukS* and *tst* genes detection (see **Supplementary Table 2b**).

<sup>f</sup>Strain\_095 harboring TSST-1 gene was seen as negative for TSST-1 by SRM. However, sequencing of TSST-1 gene detected a mutation in the proteotypic peptide selected for the SRM method. LPTPIELPLK peptide was mutated into LPTPIELPLK peptide. The corresponding precursor masses are different and the LLTPIELPLK peptide detection was impossible with the SRM method described in Supplementary table 1. Nevertheless, the current SRM method should be easily modified to integrate the transitions of the mutated peptide (data not shown).

**Supplementary Table 3c: Results of blind evaluation with set 1 strains**

| Sample name | I-peptides : <i>S. aureus</i> identification |       |        |           | R-peptides: PBP2a ( <i>mecA</i> product) <sup>b</sup> |       |        |           | R-peptides: PBP2a ( <i>mecC</i> product) <sup>d</sup> |        |        |           | V-peptides: PVL |        |        |           | V-peptides: TSST |       |        |           | MS versus molecular methods agreement <sup>e</sup> |
|-------------|----------------------------------------------|-------|--------|-----------|-------------------------------------------------------|-------|--------|-----------|-------------------------------------------------------|--------|--------|-----------|-----------------|--------|--------|-----------|------------------|-------|--------|-----------|----------------------------------------------------|
|             | 1/slope                                      | r     | Number | MS result | 1/slope                                               | r     | Number | MS result | 1/slope                                               | r      | Number | MS result | 1/slope         | r      | Number | MS result | 1/slope          | r     | Number | MS result |                                                    |
|             | 1 ± 0,3                                      | < 0,7 | ≤ 2    |           | 1 ± 0,3                                               | < 0,7 | ≤ 3    |           | 1 ± 0,3                                               | < 0,7  | ≤ 3    |           | 1 ± 0,3         | < 0,7  | ≤ 1    |           | 1 ± 0,1          | < 0,9 | ≤ 1    |           |                                                    |
| Strain_067  | 1.009                                        | 0.996 | 9      | +         | 0.932                                                 | 0.996 | 8      | +         | -0.019                                                | -0.028 | 2      | -         | 0.961           | 0.990  | 4      | +         | 0.000            | 0.000 | 0      | -         | Yes                                                |
| Strain_068  | 1.019                                        | 0.996 | 9      | +         | 0.917                                                 | 0.994 | 8      | +         | -0.096                                                | -0.179 | 2      | -         | 0.000           | 0.000  | 0      | -         | 0.880            | 0.988 | 1      | -         | Yes                                                |
| Strain_069  | 1.012                                        | 0.997 | 9      | +         | 0.295                                                 | 0.415 | 7      | -         | -0.349                                                | -0.653 | 3      | -         | 0.960           | 0.988  | 4      | +         | 0.000            | 0.000 | 0      | -         | Yes                                                |
| Strain_070  | 1.018                                        | 0.989 | 9      | +         | 0.943                                                 | 0.993 | 8      | +         | -0.090                                                | -0.162 | 2      | -         | 0.894           | 0.985  | 4      | +         | 0.000            | 0.000 | 0      | -         | Yes                                                |
| Strain_071  | 1.013                                        | 0.996 | 9      | +         | 0.933                                                 | 0.996 | 8      | +         | 0.382                                                 | 0.586  | 2      | -         | -0.689          | -0.840 | 1      | -         | 1.040            | 0.984 | 1      | +         | Yes                                                |
| Strain_072  | 0.999                                        | 0.996 | 9      | +         | 0.928                                                 | 0.990 | 8      | +         | 0.167                                                 | 0.287  | 3      | -         | 0.000           | 0.000  | 0      | -         | 0.000            | 0.000 | 0      | -         | Yes                                                |
| Strain_073  | 0.986                                        | 0.996 | 9      | +         | 0.895                                                 | 0.993 | 8      | +         | 0.328                                                 | 0.616  | 2      | -         | 0.000           | 0.000  | 0      | -         | 0.783            | 0.345 | 1      | -         | Yes                                                |
| Strain_074  | 1.013                                        | 0.997 | 9      | +         | 0.917                                                 | 0.995 | 8      | +         | 0.284                                                 | 0.459  | 3      | -         | 0.934           | 0.985  | 4      | +         | 0.000            | 0.000 | 0      | -         | Yes                                                |
| Strain_075  | 0.999                                        | 0.996 | 8      | +         | 0.232                                                 | 0.357 | 6      | -         | 0.039                                                 | 0.042  | 3      | -         | 0.000           | 0.000  | 0      | -         | 1.020            | 0.983 | 1      | +         | Yes                                                |
| Strain_076  | 1.012                                        | 0.998 | 9      | +         | 0.929                                                 | 0.996 | 8      | +         | 0.270                                                 | 0.373  | 3      | -         | 0.000           | 0.000  | 0      | -         | 0.000            | 0.000 | 0      | -         | Yes                                                |
| Strain_077  | 1.003                                        | 0.996 | 9      | +         | 0.209                                                 | 0.341 | 4      | -         | -0.404                                                | -0.757 | 2      | -         | 0.940           | 0.991  | 4      | +         | 0.000            | 0.000 | 0      | -         | Yes                                                |
| Strain_078  | 1.040                                        | 0.994 | 9      | +         | 0.159                                                 | 0.231 | 4      | -         | 0.996                                                 | 0.959  | 5      | +         | 0.000           | 0.000  | 0      | -         | 0.000            | 0.000 | 0      | -         | Yes                                                |
| Strain_079  | 1.017                                        | 0.997 | 9      | +         | 0.364                                                 | 0.458 | 6      | -         | 0.988                                                 | 0.946  | 5      | +         | 0.000           | 0.000  | 0      | -         | 0.000            | 0.000 | 0      | -         | Yes                                                |
| Strain_080  | 1.006                                        | 0.991 | 8      | +         | 0.342                                                 | 0.457 | 4      | -         | 0.000                                                 | 0.000  | 0      | -         | 0.000           | 0.000  | 0      | -         | 0.000            | 0.000 | 0      | -         | Yes                                                |
| Strain_081  | 0.997                                        | 0.998 | 9      | +         | 0.925                                                 | 0.996 | 8      | +         | -0.023                                                | -0.034 | 2      | -         | 0.000           | 0.000  | 0      | -         | 0.975            | 0.986 | 1      | +         | Yes                                                |
| Strain_082  | 1.007                                        | 0.997 | 9      | +         | 0.919                                                 | 0.992 | 8      | +         | 0.283                                                 | 0.423  | 3      | -         | 0.000           | 0.000  | 0      | -         | 0.000            | 0.000 | 0      | -         | Yes                                                |
| Strain_083  | 1.027                                        | 0.996 | 7      | +         | 0.943                                                 | 0.996 | 8      | +         | 0.001                                                 | 0.001  | 2      | -         | 0.000           | 0.000  | 0      | -         | 0.000            | 0.000 | 0      | -         | Yes                                                |
| Strain_084  | 0.842                                        | 0.872 | 7      | +         | 0.817                                                 | 0.833 | 8      | +         | 0.129                                                 | 0.164  | 3      | -         | 0.291           | 0.229  | 2      | -         | 0.000            | 0.000 | 0      | -         | Yes                                                |
| Strain_085  | 1.011                                        | 0.997 | 9      | +         | 0.955                                                 | 0.994 | 8      | +         | 0.080                                                 | 0.100  | 3      | -         | 0.000           | 0.000  | 0      | -         | 0.998            | 0.987 | 1      | +         | Yes                                                |
| Strain_086  | 1.005                                        | 0.996 | 8      | +         | 0.928                                                 | 0.994 | 8      | +         | -0.031                                                | -0.044 | 3      | -         | -0.549          | -0.536 | 1      | -         | 0.000            | 0.000 | 0      | -         | Yes                                                |

<sup>a</sup>PBP2a: Penicillin Binding Protein 2 a, encoded by *mecA* gene.

<sup>b</sup>PBP2c: Penicillin Binding Protein 2 c, encoded by *mecC* gene.

<sup>c</sup>PVL: Pantone Valentine Leukocidin.

<sup>d</sup>TSST-1: Toxic Shock Syndrome Toxin 1.

<sup>e</sup>Reference methods: WC-MALDI-TOF or full automated biochemical VITEK2<sup>®</sup> method for identification, PCR test for *mecA*, *mecC*, *lukF*, *lukS* and *tst* genes detection (see **Supplementary Table 2c**).

**Supplementary Table 3d: Results of blind evaluation with set 2 strains**

| Sample name | I-peptides : <i>S. aureus</i> identification |       |        |           | R-peptides: PBP2a ( <i>mecA</i> product) <sup>b</sup> |       |        |           | R-peptides: PBP2a ( <i>mecC</i> product) <sup>d</sup> |       |        |           | V-peptides: PVL |       |        |           | V-peptides: TSST |       |        |           | MS versus molecular methods agreement <sup>e</sup> |
|-------------|----------------------------------------------|-------|--------|-----------|-------------------------------------------------------|-------|--------|-----------|-------------------------------------------------------|-------|--------|-----------|-----------------|-------|--------|-----------|------------------|-------|--------|-----------|----------------------------------------------------|
|             | 1/slope                                      | r     | Number | MS result | 1/slope                                               | r     | Number | MS result | 1/slope                                               | r     | Number | MS result | 1/slope         | r     | Number | MS result | 1/slope          | r     | Number | MS result |                                                    |
|             | 1 ± 0,3                                      | < 0,7 | ≤ 2    |           | 1 ± 0,3                                               | < 0,7 | ≤ 3    |           | 1 ± 0,3                                               | < 0,7 | ≤ 3    |           | 1 ± 0,3         | < 0,7 | ≤ 1    |           | 1 ± 0,1          | < 0,9 | ≤ 1    |           |                                                    |
| Sample_101  | 0.884                                        | 0.990 | 4      | +         | 0.106                                                 | 0.216 | 2      | -         | 0.000                                                 | 0.000 | 0      | -         | 0.000           | 0.000 | 0      | -         | 0.000            | 0.000 | 0      | -         | Yes                                                |
| Sample_102  | 0.866                                        | 0.994 | 3      | +         | 0.064                                                 | 0.126 | 2      | -         | 0.000                                                 | 0.000 | 0      | -         | 0.000           | 0.000 | 0      | -         | 0.000            | 0.000 | 0      | -         | Yes                                                |
| Sample_103  | 0.852                                        | 0.986 | 3      | +         | 0.262                                                 | 0.236 | 1      | -         | 0.000                                                 | 0.000 | 0      | -         | 0.000           | 0.000 | 0      | -         | 0.000            | 0.000 | 0      | -         | Yes                                                |
| Sample_104  | 0.908                                        | 0.992 | 5      | +         | 0.754                                                 | 0.508 | 1      | -         | 0.000                                                 | 0.000 | 0      | -         | 0.000           | 0.000 | 0      | -         | 0.000            | 0.000 | 0      | -         | Yes                                                |
| Sample_105  | 0.857                                        | 0.990 | 4      | +         | 0.485                                                 | 0.267 | 1      | -         | 0.000                                                 | 0.000 | 0      | -         | 0.000           | 0.000 | 0      | -         | 0.000            | 0.000 | 0      | -         | Yes                                                |
| Sample_106  | 0.886                                        | 0.996 | 3      | +         | 0.212                                                 | 0.160 | 1      | -         | 0.000                                                 | 0.000 | 0      | -         | 0.000           | 0.000 | 0      | -         | 0.000            | 0.000 | 0      | -         | Yes                                                |
| Sample_107  | 0.896                                        | 0.993 | 6      | +         | 0.910                                                 | 0.976 | 8      | +         | 0.712                                                 | 0.993 | 1      | -         | 0.000           | 0.000 | 0      | -         | 0.000            | 0.000 | 0      | -         | Yes                                                |
| Sample_108  | 0.888                                        | 0.995 | 4      | +         | 0.409                                                 | 0.304 | 1      | -         | 0.000                                                 | 0.000 | 0      | -         | 0.000           | 0.000 | 0      | -         | 0.000            | 0.000 | 0      | -         | Yes                                                |
| Sample_109  | 0.821                                        | 0.989 | 5      | +         | 0.031                                                 | 0.025 | 1      | -         | 0.000                                                 | 0.000 | 0      | -         | 0.000           | 0.000 | 0      | -         | 0.000            | 0.000 | 0      | -         | Yes                                                |
| Sample_110  | 0.917                                        | 0.991 | 3      | +         | 0.097                                                 | 0.239 | 1      | -         | 0.000                                                 | 0.000 | 0      | -         | 0.000           | 0.000 | 0      | -         | 0.000            | 0.000 | 0      | -         | Yes                                                |
| Sample_111  | 0.873                                        | 0.996 | 4      | +         | 1.784                                                 | 1.000 | 1      | -         | 0.000                                                 | 0.000 | 0      | -         | 0.000           | 0.000 | 0      | -         | 0.000            | 0.000 | 0      | -         | Yes                                                |
| Sample_112  | 0.890                                        | 0.992 | 2      | +         | 0.000                                                 | 0.000 | 0      | -         | 0.000                                                 | 0.000 | 0      | -         | 0.000           | 0.000 | 0      | -         | 0.000            | 0.000 | 0      | -         | Yes                                                |
| Sample_113  | 0.895                                        | 0.996 | 2      | +         | 0.000                                                 | 0.000 | 0      | -         | 0.000                                                 | 0.000 | 0      | -         | 0.000           | 0.000 | 0      | -         | 0.000            | 0.000 | 0      | -         | Yes                                                |
| Sample_114  | 0.874                                        | 0.990 | 5      | +         | 1.333                                                 | 0.717 | 1      | -         | 0.000                                                 | 0.000 | 0      | -         | 0.000           | 0.000 | 0      | -         | 0.000            | 0.000 | 0      | -         | Yes                                                |

<sup>a</sup>PBP2a: Penicillin Binding Protein 2 a, encoded by *mecA* gene.

<sup>b</sup>PBP2c: Penicillin Binding Protein 2 c, encoded by *mecC* gene.

<sup>c</sup>PVL: Pantone Valentine Leukocidin.

<sup>d</sup>TSST-1: Toxic Shock Syndrome Toxin 1.

<sup>e</sup>Reference methods: WC-MALDI-TOF for identification, PCR test for *mecA*, *mecC*, *lukF*, *lukS* and *tst* genes detection (see **Supplementary Table 2d**).

**Supplementary Table 3e: Results of repeat set strains**

| Sample name  | I-peptides : <i>S. aureus</i> identification |            |               |                | R-peptides: PBP2a ( <i>mecA</i> product) <sup>b</sup> |            |               |                | R-peptides: PBP2a ( <i>mecC</i> product) <sup>d</sup> |            |               |                | V-peptides: PVL    |            |               |                | V-peptides: TSST   |            |               |                | MS versus molecular methods agreement <sup>f</sup> |
|--------------|----------------------------------------------|------------|---------------|----------------|-------------------------------------------------------|------------|---------------|----------------|-------------------------------------------------------|------------|---------------|----------------|--------------------|------------|---------------|----------------|--------------------|------------|---------------|----------------|----------------------------------------------------|
|              | 1/slope<br>1 ± 0,3                           | r<br>< 0,7 | Number<br>≤ 2 | MS result<br>+ | 1/slope<br>1 ± 0,3                                    | r<br>< 0,7 | Number<br>≤ 3 | MS result<br>+ | 1/slope<br>1 ± 0,3                                    | r<br>< 0,7 | Number<br>≤ 3 | MS result<br>+ | 1/slope<br>1 ± 0,3 | r<br>< 0,7 | Number<br>≤ 1 | MS result<br>+ | 1/slope<br>1 ± 0,1 | r<br>< 0,9 | Number<br>≤ 1 | MS result<br>+ |                                                    |
| Strain_067_1 | 0.962                                        | 0.994      | 9             | +              | 0.931                                                 | 0.990      | 8             | +              | -0.060                                                | -0.112     | 2             | -              | 1.049              | 0.981      | 2             | +              | 0.000              | 0.000      | 0             | -              | Yes                                                |
| Strain_071_1 | 0.977                                        | 0.994      | 9             | +              | 0.970                                                 | 0.990      | 8             | +              | 0.849                                                 | 0.995      | 1             | -              | 0.361              | 0.940      | 1             | -              | 1.059              | 0.990      | 1             | +              | Yes                                                |
| Strain_075_1 | 0.981                                        | 0.991      | 8             | +              | 0.226                                                 | 0.376      | 4             | -              | 0.100                                                 | 0.057      | 1             | -              | 0.000              | 0.000      | 0             | -              | 1.027              | 0.983      | 1             | +              | Yes                                                |
| Strain_077_1 | 0.955                                        | 0.994      | 9             | +              | 0.529                                                 | 0.945      | 3             | -              | -0.488                                                | -0.999     | 1             | -              | 1.089              | 0.917      | 1             | +              | 0.000              | 0.000      | 0             | -              | Yes                                                |
| Strain_078_1 | 0.985                                        | 0.994      | 9             | +              | -0.090                                                | -0.113     | 5             | -              | 0.986                                                 | 0.983      | 5             | +              | 0.000              | 0.000      | 0             | -              | 0.000              | 0.000      | 0             | -              | Yes                                                |
| Strain_079_1 | 0.972                                        | 0.994      | 9             | +              | 0.401                                                 | 0.662      | 5             | -              | 0.934                                                 | 0.987      | 5             | +              | 0.379              | 0.923      | 1             | -              | 0.000              | 0.000      | 0             | -              | Yes                                                |
| Strain_080_1 | 0.971                                        | 0.996      | 9             | +              | 0.342                                                 | 0.572      | 4             | -              | -0.452                                                | -0.999     | 1             | -              | 0.000              | 0.000      | 0             | -              | 0.000              | 0.000      | 0             | -              | Yes                                                |
| Strain_084_1 | 0.964                                        | 0.995      | 9             | +              | 0.935                                                 | 0.993      | 8             | +              | 0.805                                                 | 0.994      | 1             | -              | 0.000              | 0.000      | 0             | -              | -0.725             | -0.652     | 1             | -              | Yes                                                |
| Strain_085_1 | 0.976                                        | 0.993      | 9             | +              | 0.925                                                 | 0.993      | 8             | +              | 0.325                                                 | 0.463      | 3             | -              | 0.000              | 0.000      | 0             | -              | 1.073              | 0.987      | 1             | +              | Yes                                                |
| Strain_010_1 | 0.925                                        | 0.576      | 1             | -              | 0.001                                                 | 0.001      | 5             | -              | 0.086                                                 | 0.139      | 2             | -              | 0.000              | 0.000      | 0             | -              | 0.000              | 0.000      | 0             | -              | Yes                                                |
| Strain_024_1 | 0.973                                        | 0.994      | 9             | +              | 0.941                                                 | 0.992      | 8             | +              | 0.490                                                 | 0.534      | 3             | -              | 0.000              | 0.000      | 0             | -              | 0.000              | 0.000      | 0             | -              | Yes                                                |
| Strain_070_1 | 0.989                                        | 0.994      | 9             | +              | 0.942                                                 | 0.996      | 8             | +              | -0.068                                                | -0.110     | 2             | -              | 1.025              | 0.897      | 1             | +              | 0.000              | 0.000      | 0             | -              | Yes                                                |
| Strain_067_2 | 0.970                                        | 0.994      | 9             | +              | 0.916                                                 | 0.993      | 8             | +              | 0.823                                                 | 0.994      | 1             | -              | 1.114              | 0.987      | 2             | +              | 0.000              | 0.000      | 0             | -              | Yes                                                |
| Strain_070_2 | 0.982                                        | 0.992      | 9             | +              | 0.915                                                 | 0.994      | 8             | +              | 0.294                                                 | 0.359      | 2             | -              | 1.054              | 0.998      | 1             | +              | 0.000              | 0.000      | 0             | -              | Yes                                                |
| Strain_071_2 | 0.967                                        | 0.994      | 9             | +              | 0.950                                                 | 0.994      | 8             | +              | -0.058                                                | -0.099     | 2             | -              | 0.000              | 0.000      | 0             | -              | 0.939              | 0.986      | 1             | +              | Yes                                                |
| Strain_075_2 | 0.969                                        | 0.996      | 8             | +              | 0.331                                                 | 0.502      | 6             | -              | -0.068                                                | -0.059     | 2             | -              | 0.000              | 0.000      | 0             | -              | 0.968              | 0.980      | 1             | +              | Yes                                                |
| Strain_077_2 | 0.964                                        | 0.989      | 9             | +              | 0.168                                                 | 0.339      | 3             | -              | -0.520                                                | -0.996     | 1             | -              | 1.031              | 0.972      | 2             | +              | 0.000              | 0.000      | 0             | -              | Yes                                                |
| Strain_078_2 | 0.982                                        | 0.993      | 9             | +              | 0.036                                                 | 0.052      | 5             | -              | 0.951                                                 | 0.973      | 5             | +              | 0.000              | 0.000      | 0             | -              | 0.000              | 0.000      | 0             | -              | Yes                                                |
| Strain_079_2 | 0.981                                        | 0.994      | 9             | +              | 0.285                                                 | 0.495      | 4             | -              | 0.928                                                 | 0.992      | 5             | +              | 0.564              | 0.743      | 1             | -              | 0.000              | 0.000      | 0             | -              | Yes                                                |
| Strain_080_2 | 0.987                                        | 0.995      | 9             | +              | 0.120                                                 | 0.187      | 3             | -              | -0.403                                                | -0.999     | 1             | -              | 0.000              | 0.000      | 0             | -              | 0.000              | 0.000      | 0             | -              | Yes                                                |
| Strain_084_2 | 0.976                                        | 0.992      | 9             | +              | 0.945                                                 | 0.994      | 8             | +              | 0.249                                                 | 0.297      | 2             | -              | 0.355              | 0.936      | 1             | -              | 0.000              | 0.000      | 0             | -              | Yes                                                |
| Strain_085_2 | 0.962                                        | 0.992      | 9             | +              | 0.923                                                 | 0.993      | 8             | +              | 0.574                                                 | 0.706      | 2             | -              | 0.000              | 0.000      | 0             | -              | 0.970              | 0.990      | 1             | +              | Yes                                                |
| Strain_010_3 | 0.000                                        | 0.000      | 0             | -              | 0.168                                                 | 0.439      | 2             | -              | 0.000                                                 | 0.000      | 0             | -              | 0.000              | 0.000      | 0             | -              | 0.000              | 0.000      | 0             | -              | Yes                                                |
| Strain_024_3 | 0.984                                        | 0.993      | 9             | +              | 0.945                                                 | 0.987      | 8             | +              | -0.068                                                | -0.106     | 2             | -              | 0.000              | 0.000      | 0             | -              | 0.000              | 0.000      | 0             | -              | Yes                                                |
| Strain_067_3 | 0.974                                        | 0.993      | 9             | +              | 0.931                                                 | 0.994      | 8             | +              | 0.016                                                 | 0.023      | 3             | -              | 1.001              | 0.987      | 3             | +              | 0.000              | 0.000      | 0             | -              | Yes                                                |
| Strain_070_3 | 0.986                                        | 0.995      | 9             | +              | 0.928                                                 | 0.994      | 8             | +              | 0.070                                                 | 0.097      | 2             | -              | 1.154              | 0.986      | 1             | +              | 0.000              | 0.000      | 0             | -              | Yes                                                |
| Strain_071_3 | 0.984                                        | 0.994      | 9             | +              | 0.952                                                 | 0.995      | 8             | +              | -0.061                                                | -0.100     | 2             | -              | 0.000              | 0.000      | 0             | -              | 0.942              | 0.987      | 1             | +              | Yes                                                |
| Strain_075_3 | 0.963                                        | 0.994      | 8             | +              | 0.149                                                 | 0.243      | 4             | -              | -0.033                                                | -0.035     | 2             | -              | 0.000              | 0.000      | 0             | -              | 0.986              | 0.982      | 1             | +              | Yes                                                |
| Strain_077_3 | 0.977                                        | 0.993      | 9             | +              | 0.253                                                 | 0.499      | 3             | -              | 0.000                                                 | 0.000      | 0             | -              | 1.010              | 0.987      | 3             | +              | 0.000              | 0.000      | 0             | -              | Yes                                                |
| Strain_078_3 | 0.971                                        | 0.994      | 9             | +              | 0.163                                                 | 0.261      | 4             | -              | 0.847                                                 | 0.848      | 5             | +              | 0.000              | 0.000      | 0             | -              | 0.000              | 0.000      | 0             | -              | Yes                                                |
| Strain_079_3 | 0.987                                        | 0.995      | 9             | +              | 0.299                                                 | 0.497      | 4             | -              | 0.942                                                 | 0.990      | 5             | +              | 0.383              | 0.930      | 1             | -              | 0.000              | 0.000      | 0             | -              | Yes                                                |
| Strain_080_3 | 0.972                                        | 0.993      | 9             | +              | 0.342                                                 | 0.539      | 4             | -              | -0.213                                                | -0.369     | 2             | -              | 0.000              | 0.000      | 0             | -              | 0.000              | 0.000      | 0             | -              | Yes                                                |
| Strain_084_3 | 0.980                                        | 0.994      | 9             | +              | 0.949                                                 | 0.994      | 8             | +              | -0.004                                                | -0.006     | 2             | -              | 0.000              | 0.000      | 0             | -              | 0.000              | 0.000      | 0             | -              | Yes                                                |
| Strain_085_3 | 0.967                                        | 0.992      | 9             | +              | 0.931                                                 | 0.993      | 8             | +              | 0.590                                                 | 0.728      | 2             | -              | 0.000              | 0.000      | 0             | -              | 1.009              | 0.985      | 1             | +              | Yes                                                |

<sup>a</sup>PBP2a: Penicillin Binding Protein 2 a, encoded by *mecA* gene.

<sup>b</sup>PBP2c: Penicillin Binding Protein 2 c, encoded by *mecC* gene.

<sup>c</sup>PVL: Pantone Valentine Leukocidin.

<sup>d</sup>TSST-1: Toxic Shock Syndrome Toxin 1.

<sup>e</sup>Reference methods: full automated biochemical VITEK2<sup>®</sup> method for identification, PCR test for *mecA*, *mecC*, *lukF*, *lukS* and *tst* genes detection (see **Supplementary Table 2a and 2c**).

**Supplementary Table 4: Typing information, Staphylococcus aureus blind evaluation set 1**

The number of peptides shared between strains was counted using I-Peptides and T-Peptides (cf. **Supplementary Table 1**). The higher the number is the closer the strains are.

| Sample                             | STAAU_067 | STAAU_068 | STAAU_069 | STAAU_070 | STAAU_071 | STAAU_072 | STAAU_073 | STAAU_074 | STAAU_075 | STAAU_076 | STAAU_077 | STAAU_078 | STAAU_079 | STAAU_080 | STAAU_081 | STAAU_082 | STAAU_083 | STAAU_084 | STAAU_085 | STAAU_086 |
|------------------------------------|-----------|-----------|-----------|-----------|-----------|-----------|-----------|-----------|-----------|-----------|-----------|-----------|-----------|-----------|-----------|-----------|-----------|-----------|-----------|-----------|
| STAAU_067                          | 24        | 24        | 24        | 21        | 18        | 15        | 19        | 23        | 19        | 17        | 20        | 21        | 22        | 17        | 22        | 21        | 18        | 16        | 22        | 20        |
| STAAU_068                          | 24        | 24        | 24        | 21        | 18        | 15        | 19        | 23        | 19        | 17        | 20        | 21        | 22        | 17        | 22        | 21        | 18        | 16        | 22        | 20        |
| STAAU_069                          | 24        | 24        | 24        | 21        | 18        | 15        | 19        | 23        | 19        | 17        | 20        | 21        | 22        | 17        | 22        | 21        | 18        | 16        | 22        | 20        |
| STAAU_070                          | 21        | 21        | 21        | 24        | 17        | 16        | 18        | 22        | 20        | 18        | 19        | 22        | 21        | 16        | 21        | 20        | 19        | 15        | 21        | 17        |
| STAAU_071                          | 18        | 18        | 18        | 17        | 24        | 17        | 21        | 19        | 17        | 19        | 18        | 15        | 18        | 17        | 18        | 19        | 18        | 16        | 18        | 18        |
| STAAU_072                          | 15        | 15        | 15        | 16        | 17        | 24        | 20        | 16        | 12        | 22        | 17        | 14        | 17        | 16        | 15        | 16        | 13        | 15        | 15        | 13        |
| STAAU_073                          | 19        | 19        | 19        | 18        | 21        | 20        | 24        | 20        | 16        | 22        | 21        | 16        | 19        | 16        | 19        | 20        | 17        | 19        | 19        | 17        |
| STAAU_074                          | 23        | 23        | 23        | 22        | 19        | 16        | 20        | 24        | 20        | 18        | 21        | 20        | 21        | 16        | 23        | 22        | 19        | 17        | 23        | 19        |
| STAAU_075                          | 19        | 19        | 19        | 20        | 17        | 12        | 16        | 20        | 24        | 14        | 19        | 20        | 17        | 14        | 19        | 18        | 21        | 13        | 21        | 19        |
| STAAU_076                          | 17        | 17        | 17        | 18        | 19        | 22        | 22        | 18        | 14        | 24        | 19        | 16        | 19        | 18        | 17        | 18        | 15        | 17        | 17        | 15        |
| STAAU_077                          | 20        | 20        | 20        | 19        | 18        | 17        | 21        | 21        | 19        | 19        | 24        | 19        | 20        | 13        | 20        | 19        | 16        | 18        | 22        | 16        |
| STAAU_078                          | 21        | 21        | 21        | 22        | 15        | 14        | 16        | 20        | 20        | 16        | 19        | 24        | 21        | 16        | 19        | 18        | 17        | 13        | 21        | 17        |
| STAAU_079                          | 22        | 22        | 22        | 21        | 18        | 17        | 19        | 21        | 17        | 19        | 20        | 21        | 24        | 17        | 20        | 19        | 16        | 16        | 20        | 18        |
| STAAU_080                          | 17        | 17        | 17        | 16        | 17        | 16        | 16        | 16        | 14        | 18        | 13        | 16        | 17        | 24        | 15        | 18        | 15        | 13        | 15        | 17        |
| STAAU_081                          | 22        | 22        | 22        | 21        | 18        | 15        | 19        | 23        | 19        | 17        | 20        | 19        | 20        | 15        | 24        | 21        | 18        | 18        | 22        | 18        |
| STAAU_082                          | 21        | 21        | 21        | 20        | 19        | 16        | 20        | 22        | 18        | 18        | 19        | 18        | 19        | 18        | 21        | 24        | 19        | 17        | 21        | 19        |
| STAAU_083                          | 18        | 18        | 18        | 19        | 18        | 13        | 17        | 19        | 21        | 15        | 16        | 17        | 16        | 15        | 18        | 19        | 24        | 14        | 18        | 20        |
| STAAU_084                          | 16        | 16        | 16        | 15        | 16        | 15        | 19        | 17        | 13        | 17        | 18        | 13        | 16        | 13        | 18        | 17        | 14        | 24        | 16        | 14        |
| STAAU_085                          | 22        | 22        | 22        | 21        | 18        | 15        | 19        | 23        | 21        | 17        | 22        | 21        | 20        | 15        | 22        | 21        | 18        | 16        | 24        | 18        |
| STAAU_086                          | 20        | 20        | 20        | 17        | 18        | 13        | 17        | 19        | 19        | 15        | 16        | 17        | 18        | 17        | 18        | 19        | 20        | 14        | 18        | 24        |
| CC <sup>a</sup> or ST <sup>b</sup> | ST80      | ST80      | ST80      | ST5       | ST5       | ST5       | ST8       | ST8       | CC30      | ST398     | ST398     | ST1945    | ST130     | CC121     | ST5       | ST239     | CC5       | CC22      | CC36      | CC45      |
| <i>spa</i> type                    | t044      | t376      | t934      | t450      | t242      | t242      | t008      | t008      | t012      | ND        | t571      | t843      | t843      | ND        | ND        | ND        | ND        | ND        | ND        | ND        |

<sup>a</sup>CC: clonal complex

<sup>b</sup>ST: sequence type.

**Supplementary Figure 1: Screenshot of Strain\_067**, analysed in blind conditions and identified as *S. aureus*, expressing both Penicillin Binding Protein 2a (PBP2a) and Panton-Valentine Leukocidin (PVL), but neither Penicillin Binding Protein 2c (PBP2c), nor Toxic Shock Syndrome Toxin 1 (TSST-1).

Peptides used for strain identification, resistance markers and virulence factors are identified by green, red and blue stars, respectively. Black crosses show isolated transitions.

A - Extracted ion chromatogram of peptides used for identification.

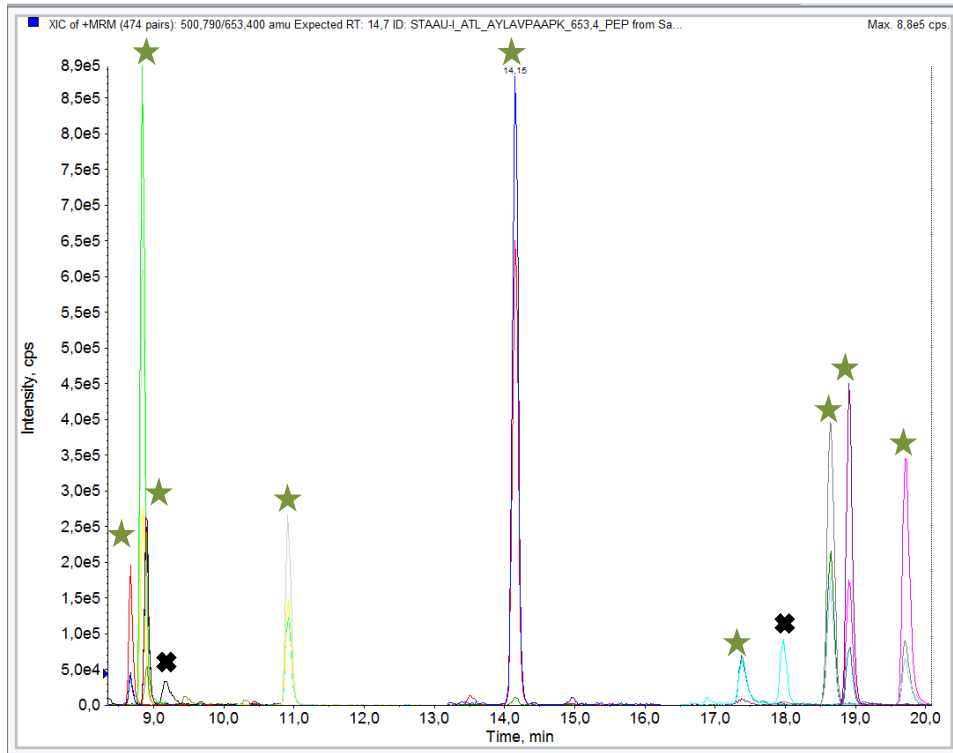

B - Extracted Ion chromatogram of peptides used for Penicillin Binding Protein 2a (PBP2a) detection.

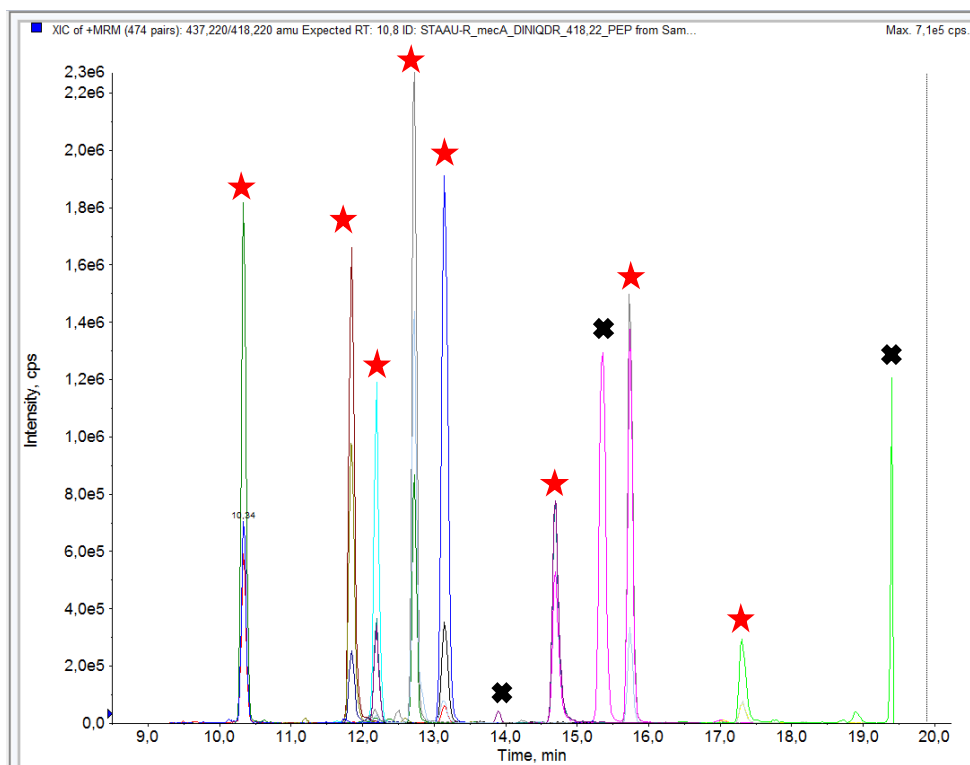

C - Extracted Ion chromatogram of peptides used for Penicillin Binding Protein 2c (PBP2c) detection.

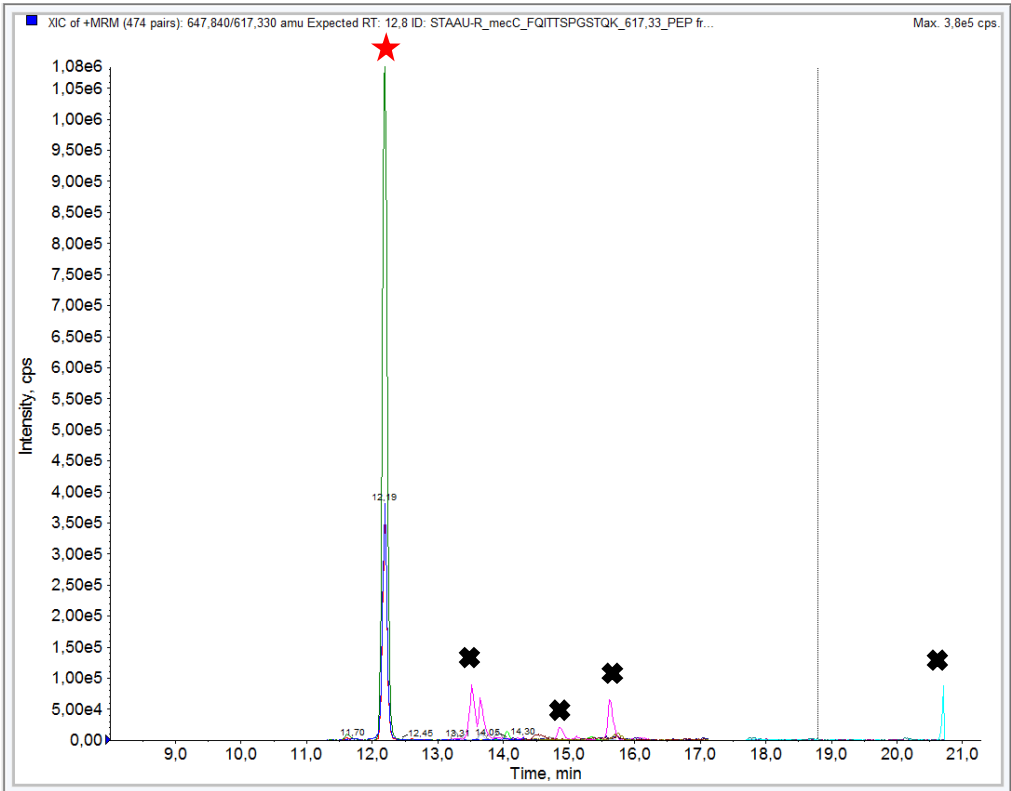

To be noted, one peptide is shared by PBP2a and PBP2c.

D - Extracted ion chromatogram of peptide used for Panton-Valentine Leukocidin (PVL) detection.

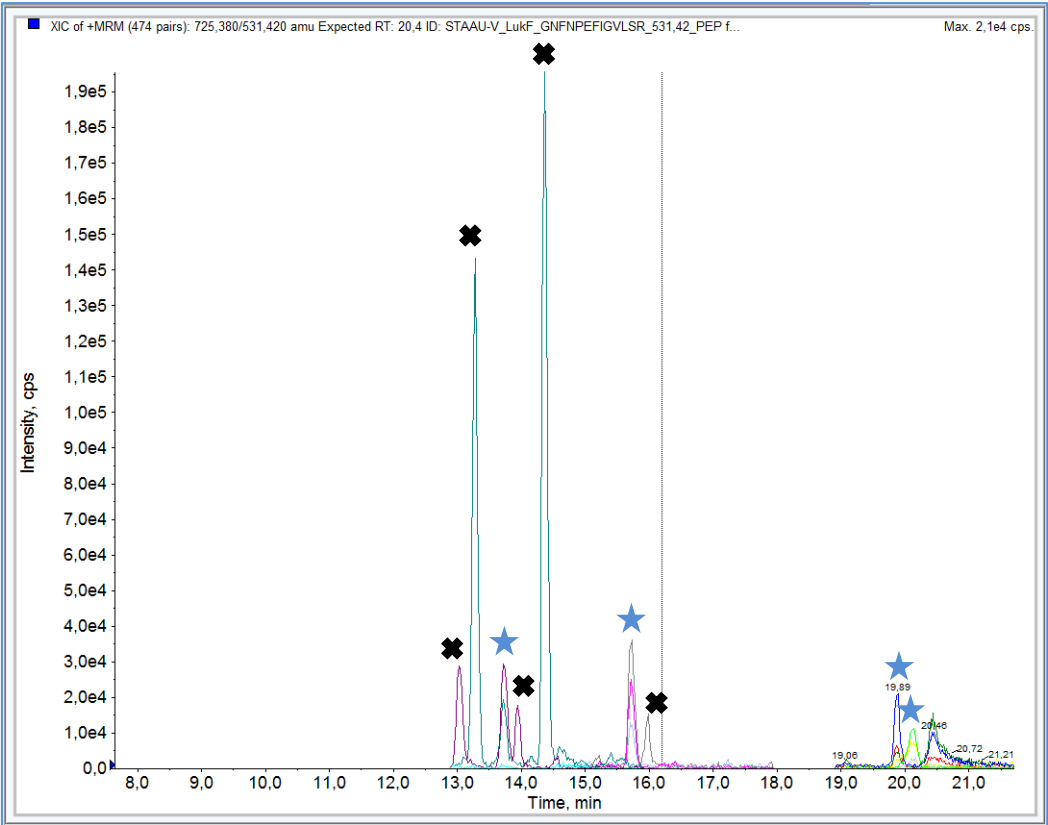



E - Extracted ion chromatogram of peptide used for Toxic Shock Syndrome Toxin 1 (TSST-1) detection.

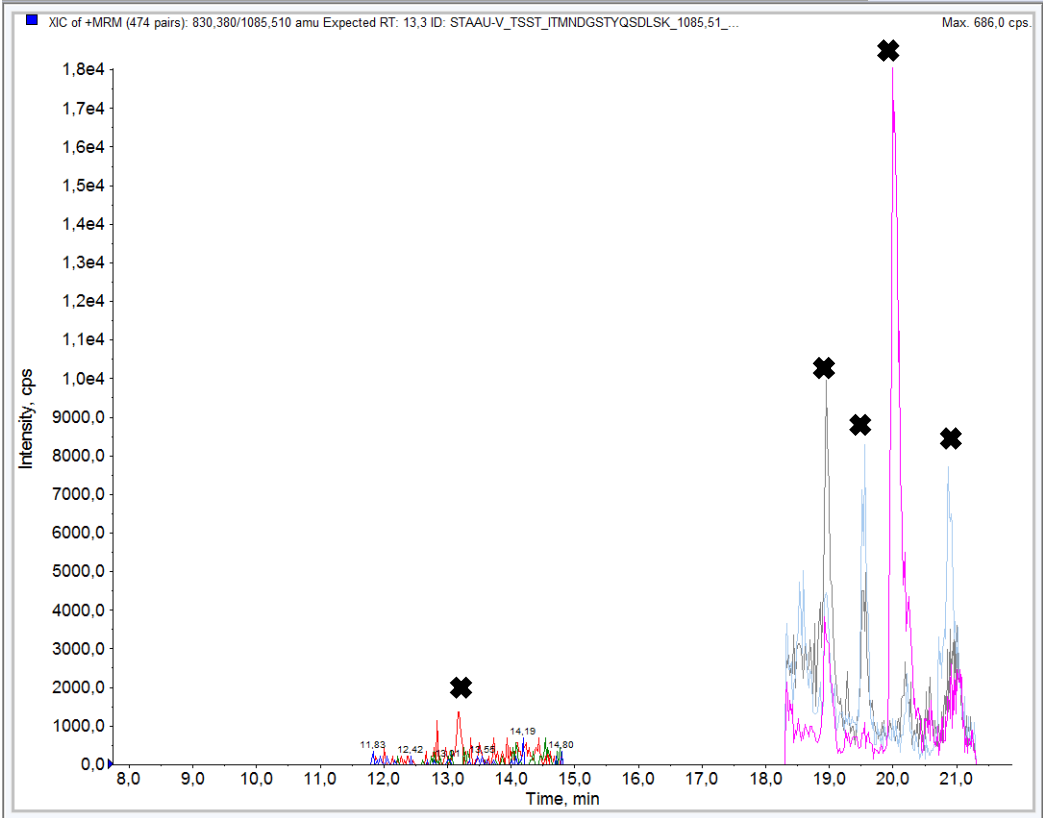

F - Total extracted ion chromatogram

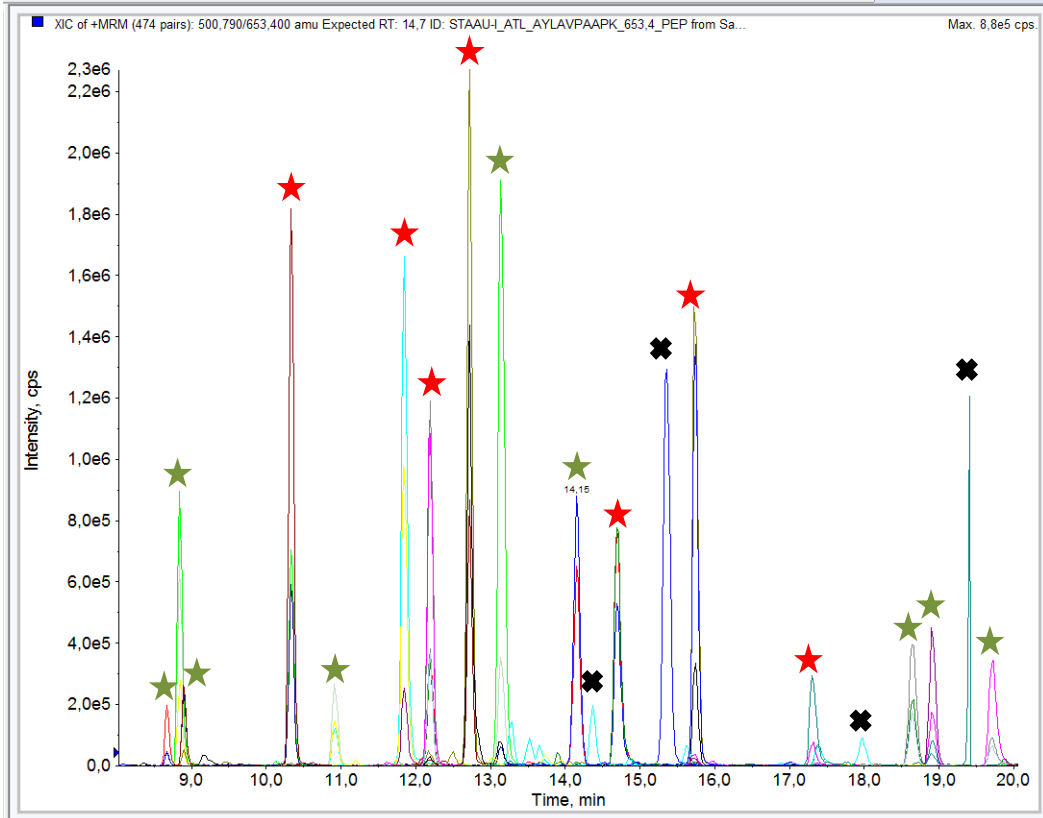

**Supplementary Figure 2: Screenshot of Strain\_080**, analysed in blind condition, identified as *S. aureus*, expressing neither Penicillin Binding Protein 2a (PBP2a), Penicillin Binding Protein 2c (PBP2c), Panton-Valentine Leukocidin (PVL) nor Toxic Shock Syndrome Toxin 1 (TSST-1).

Peptides used for strain identification, resistance markers and virulence factors are identified by green, red and blue stars, respectively. Black crosses show isolated transitions.

A - Extracted ion chromatogram of peptides used for identification.

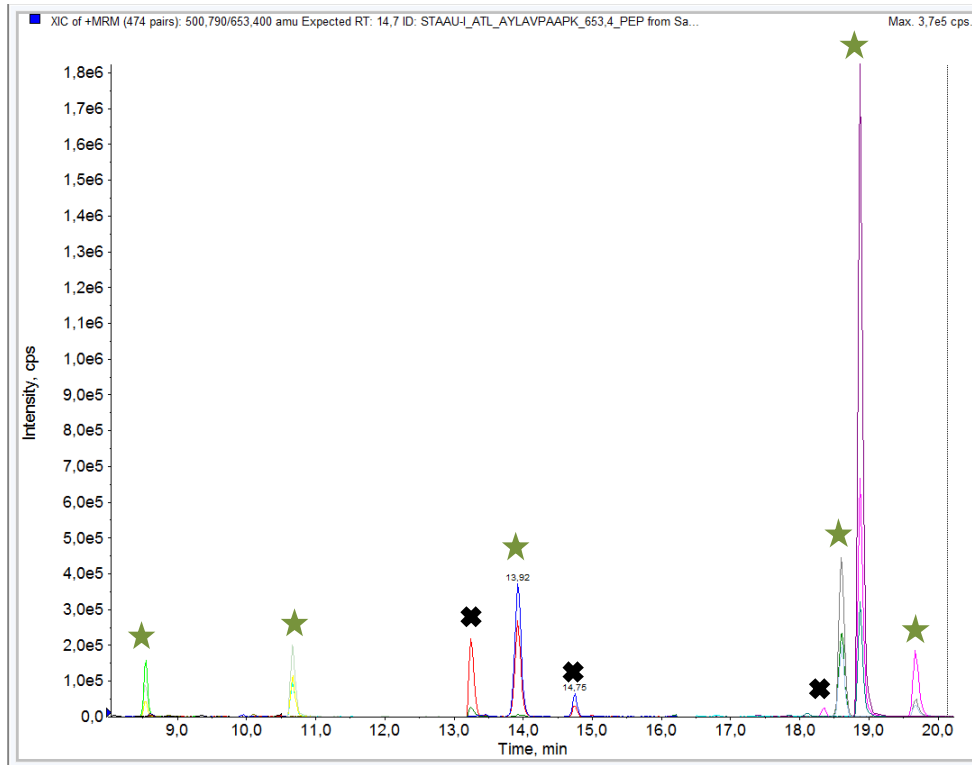

B - Extracted Ion chromatogram of peptides used for Penicillin Binding Protein 2a (PBP2a) detection.

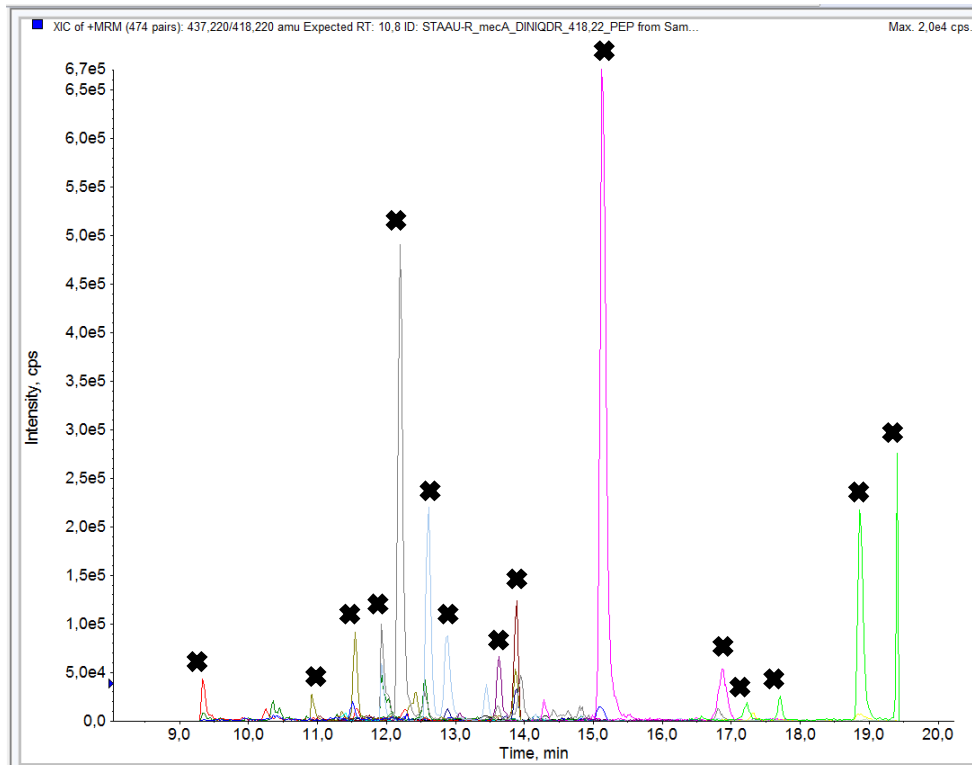

C - Extracted Ion chromatogram of peptides used for Penicillin Binding Protein 2c (PBP2c) detection.

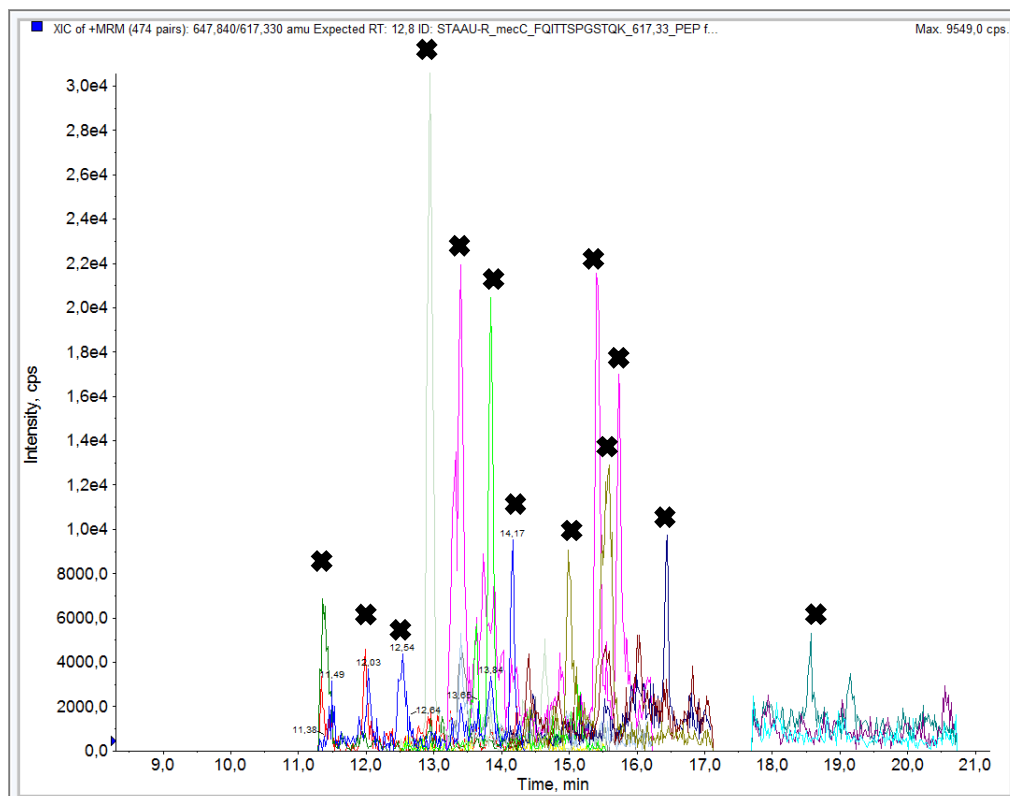

D - Extracted ion chromatogram of peptide used for Panton-Valentine Leukocidin (PVL) detection.

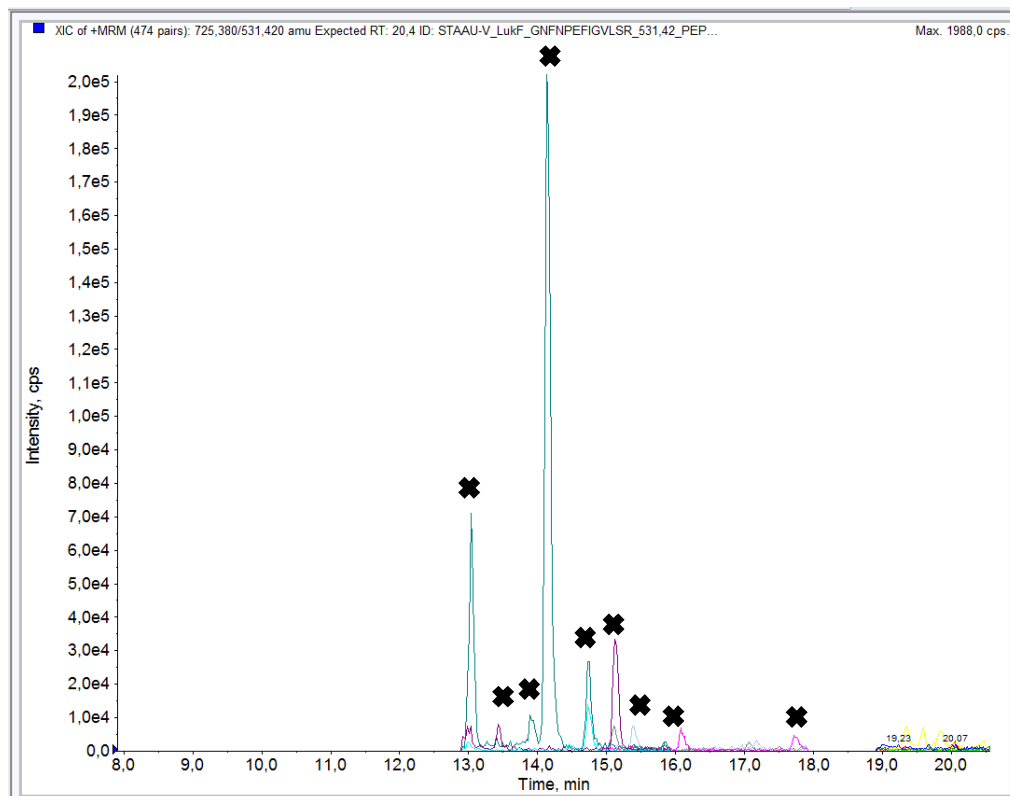

E - Extracted ion chromatogram of peptide used for Toxic Shock Syndrome Toxin 1 (TSST-1) detection.

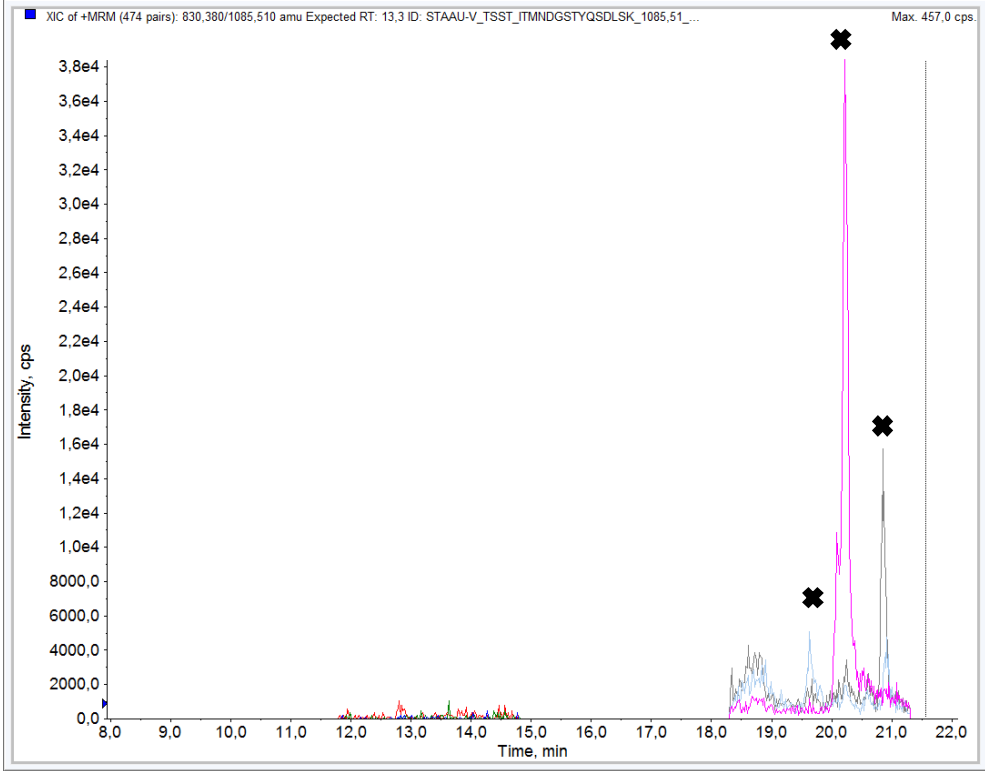

F - Total extracted ion chromatogram

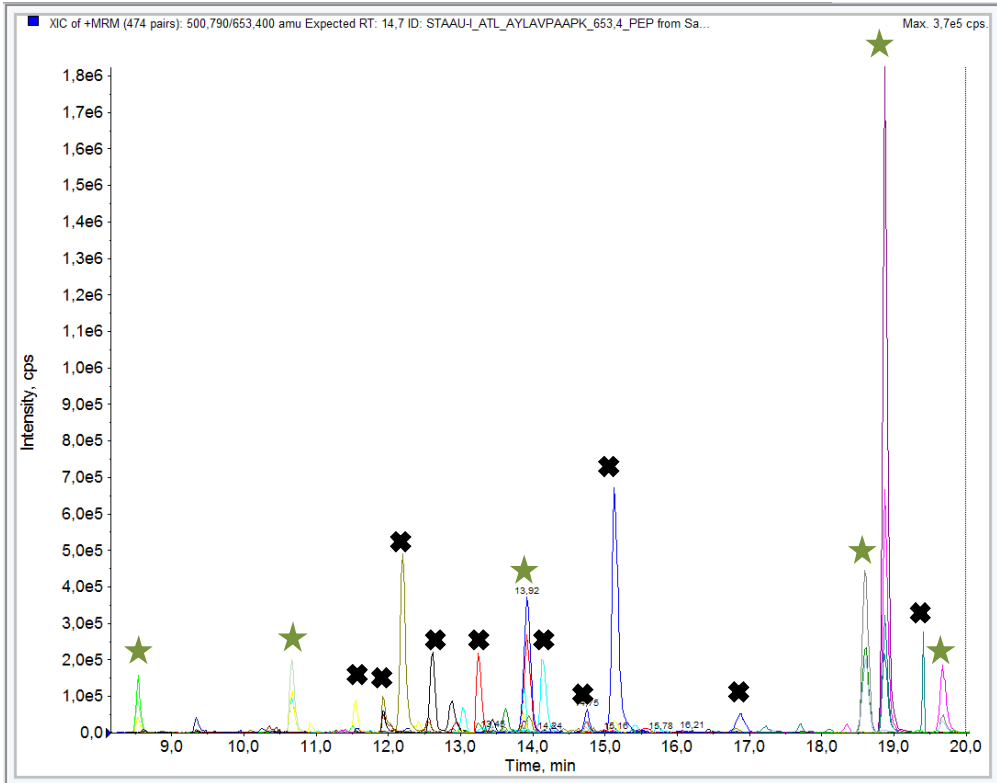

**Supplementary Figure 3: Screenshot of Strain\_040**, analysed in blind conditions, and identified as *Staphylococcus hominis* and expressing neither Penicillin Binding Protein 2a (PBP2a) neither Penicillin Binding Protein 2c (PBP2c), nor Panton-Valentine Leukocidin (PVL), nor Toxic Shock Syndrome Toxin 1 (TSST-1).

Peptides used for strain identification, resistance markers and virulence factors are identified by green, red and blue stars, respectively. Black crosses show isolated transitions.

A - Extracted ion chromatogram of peptides used for identification.

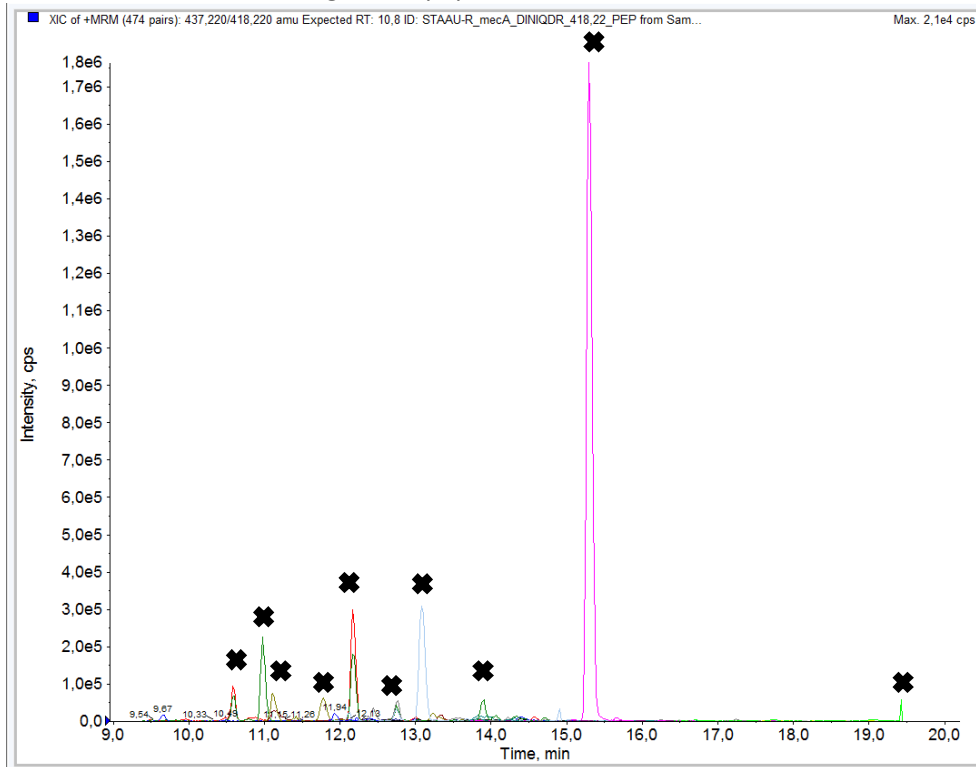

B - Extracted Ion chromatogram of peptides used for Penicillin Binding Protein 2a (PBP2a) detection.

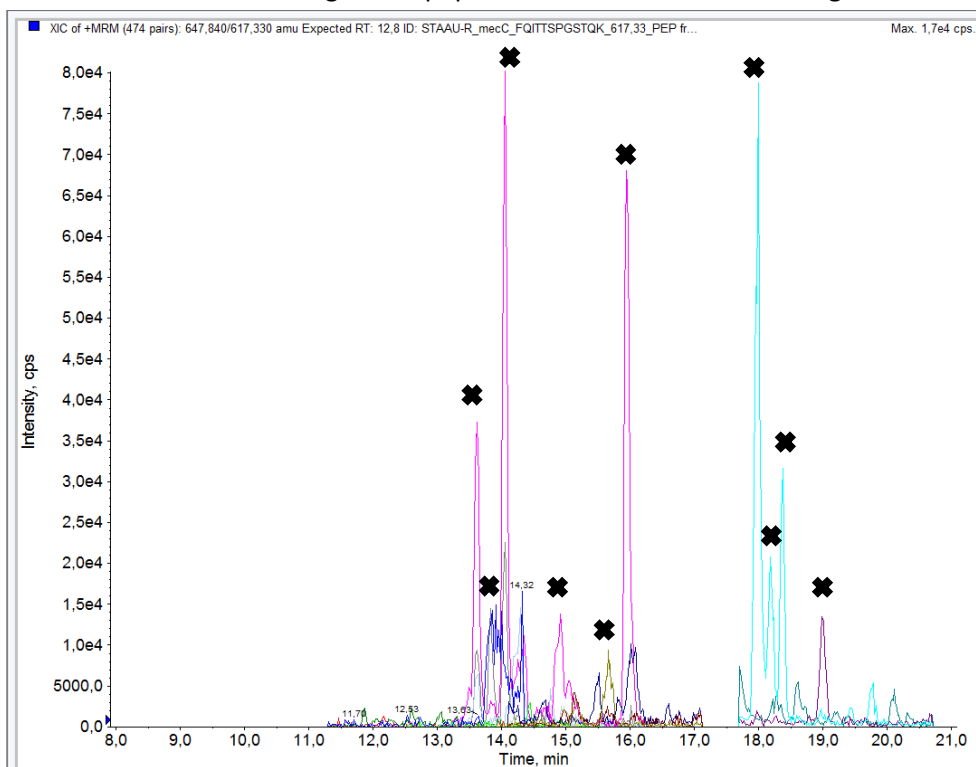

C - Extracted ion chromatogram of peptides used for Penicillin Binding Protein 2c (PBP2c) detection.

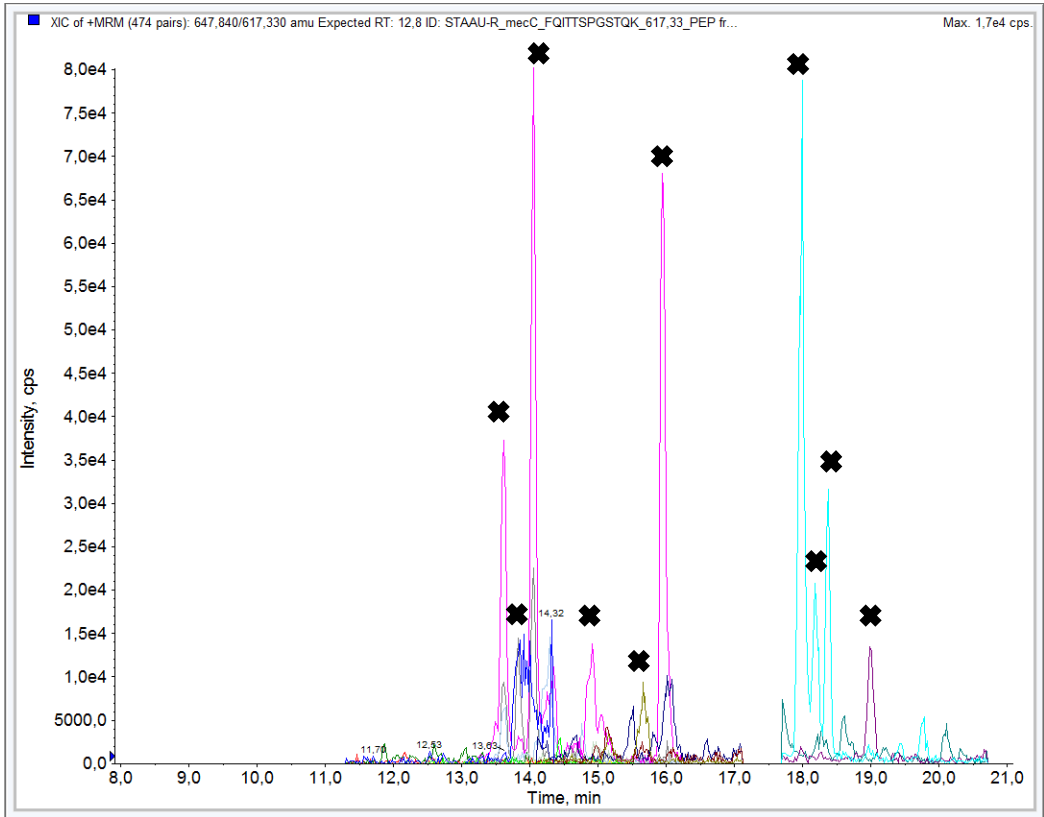

D - Extracted ion chromatogram of peptide used for Panton-Valentine Leukocidin (PVL) detection.

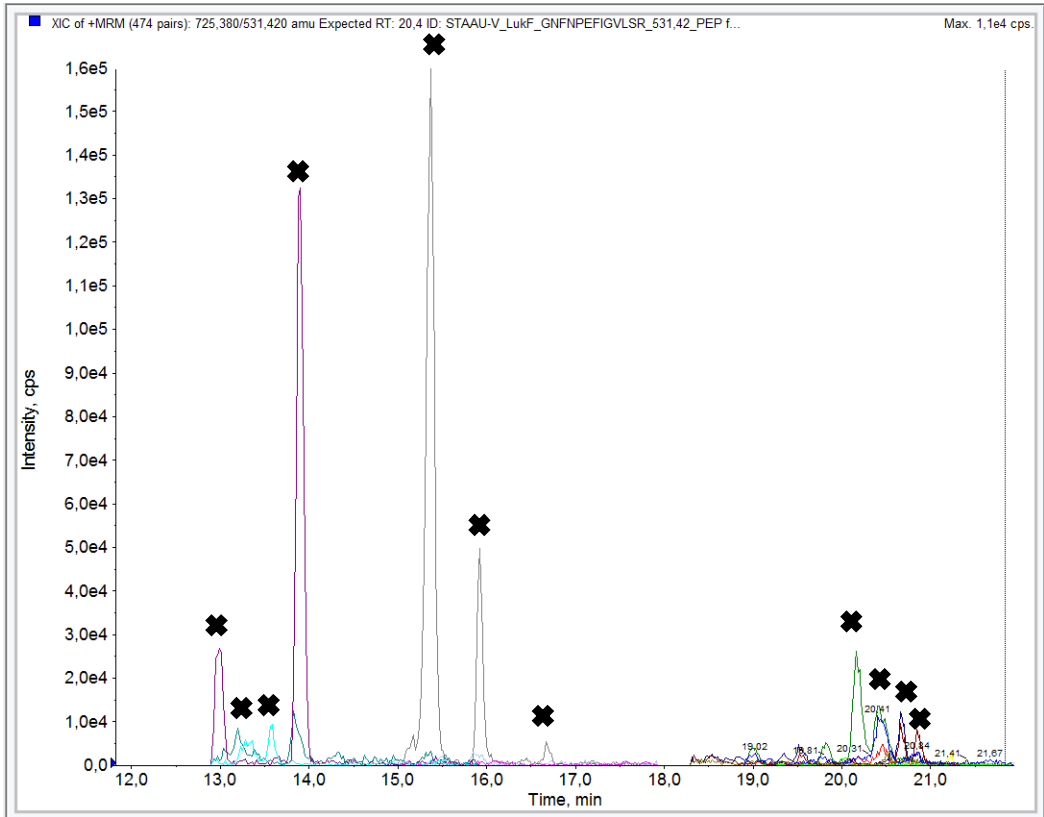

E - Extracted ion chromatogram of peptide used for Toxic Shock Syndrome Toxin 1 (TSST-1) detection.

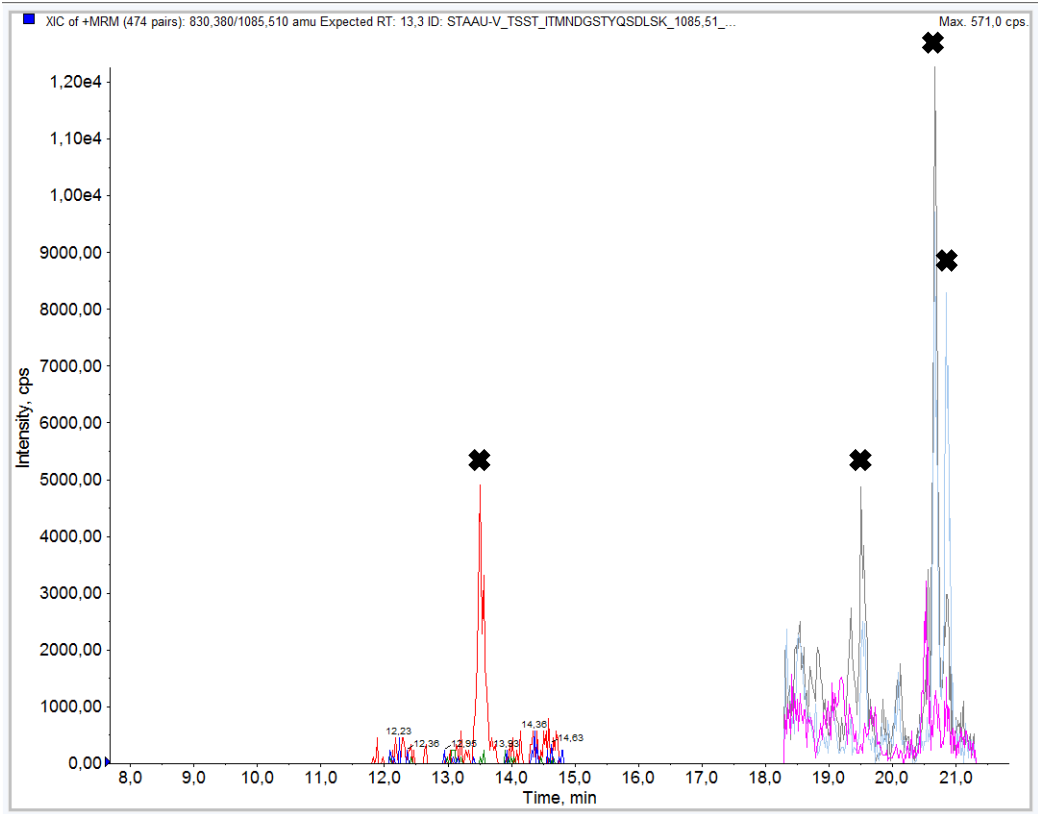

F: Total extracted ion chromatogram

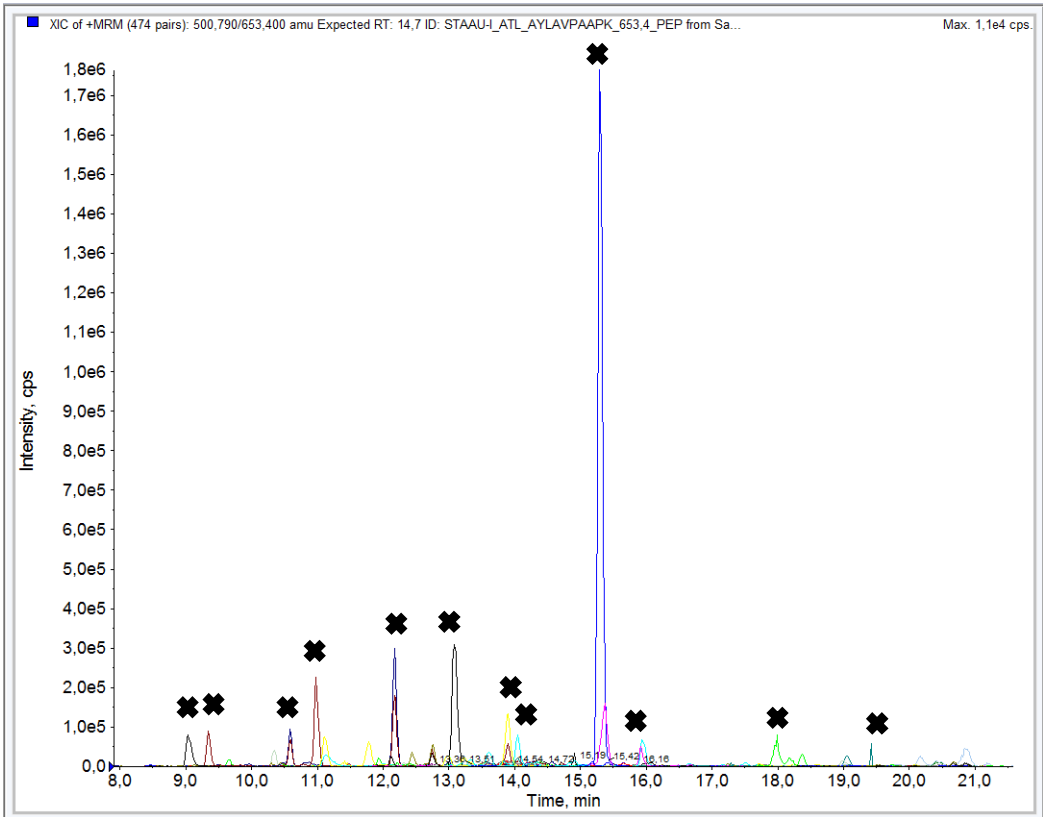

**Supplementary Figure 4:** Screenshot of Strain\_071, analysed in blind conditions, and identified as *Staphylococcus aureus*, expressing Penicillin Binding Protein 2a (PBP2a) and Toxic Shock Syndrome Toxin 1 (TSST-1), but neither Penicillin Binding Protein 2c (PBP2c), nor Panton-Valentine Leukocidin (PVL).

Peptides used for strain identification, resistance markers and virulence factors are identified by green, red and blue stars, respectively. Black crosses show isolated transitions.

A - Extracted ion chromatogram of peptides used for identification

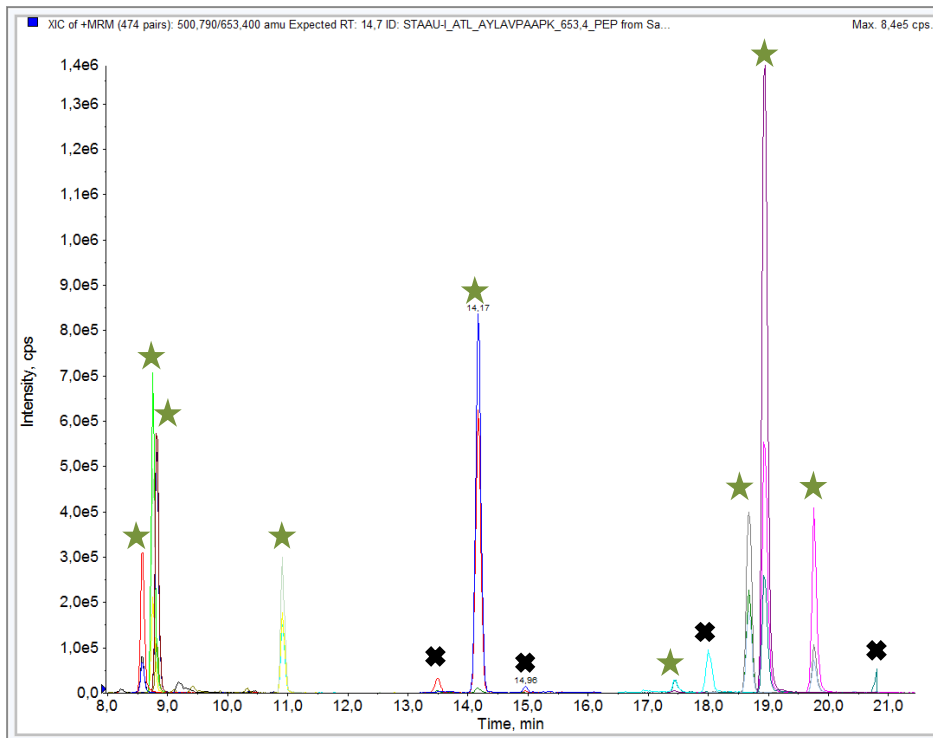

B - Extracted Ion chromatogram of peptides used for Penicillin Binding Protein 2a (PBP2a) detection.

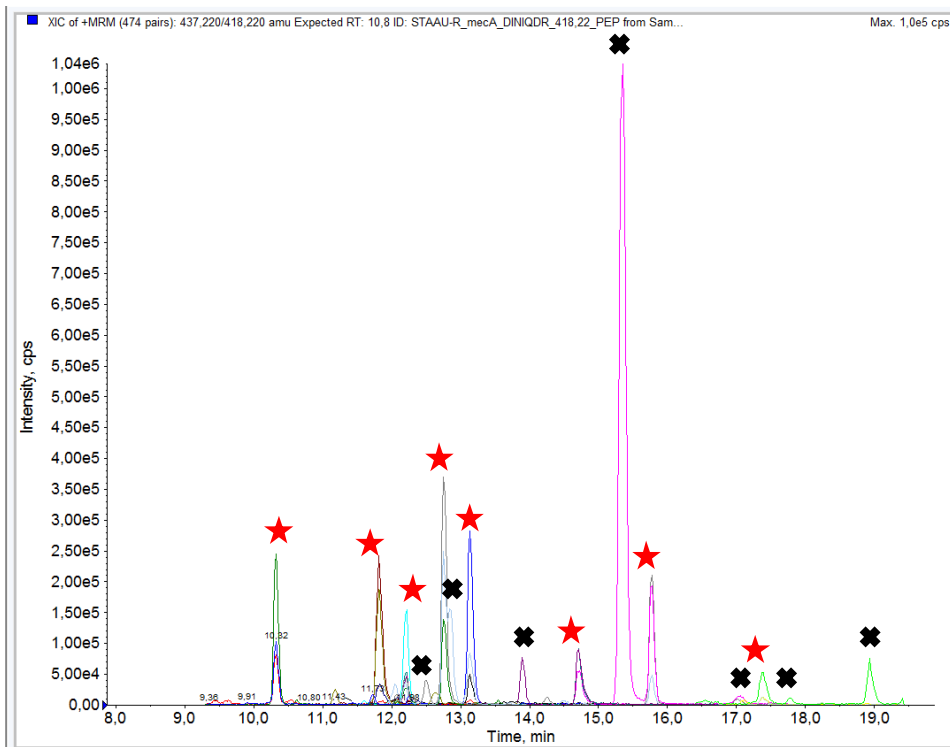



C - Extracted Ion chromatogram of peptides used for Penicillin Binding Protein 2c (PBP2c) detection.

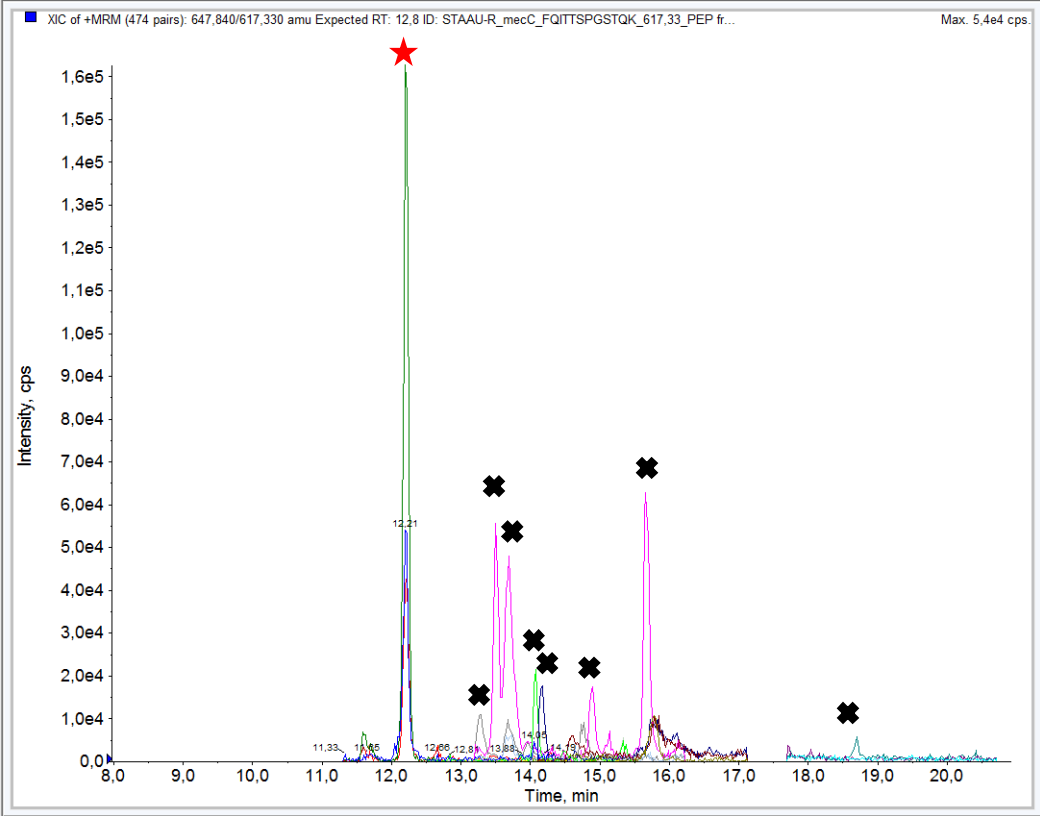

To be noted, one peptide is shared by PBP2a and PBP2c.

D - Extracted ion chromatogram of peptide used for Panton-Valentine Leukocidin (PVL) detection.

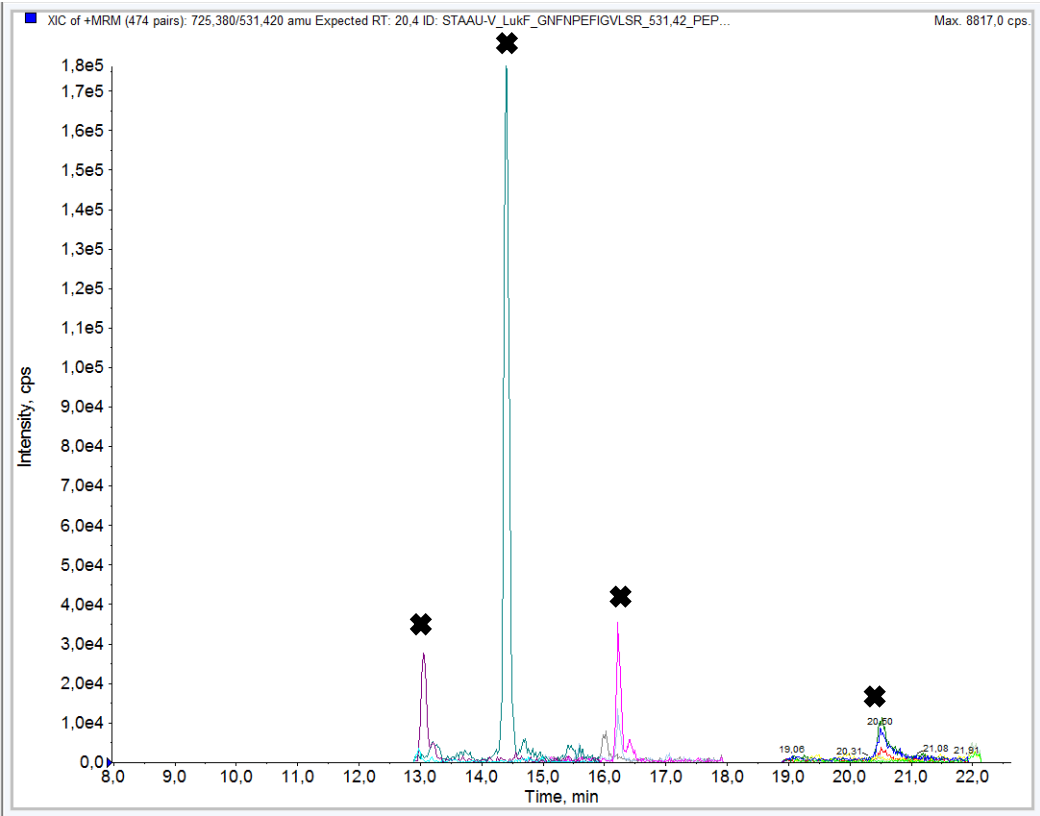

E - Extracted ion chromatogram of peptide used for Toxic Shock Syndrome Toxin 1 (TSST-1) detection.

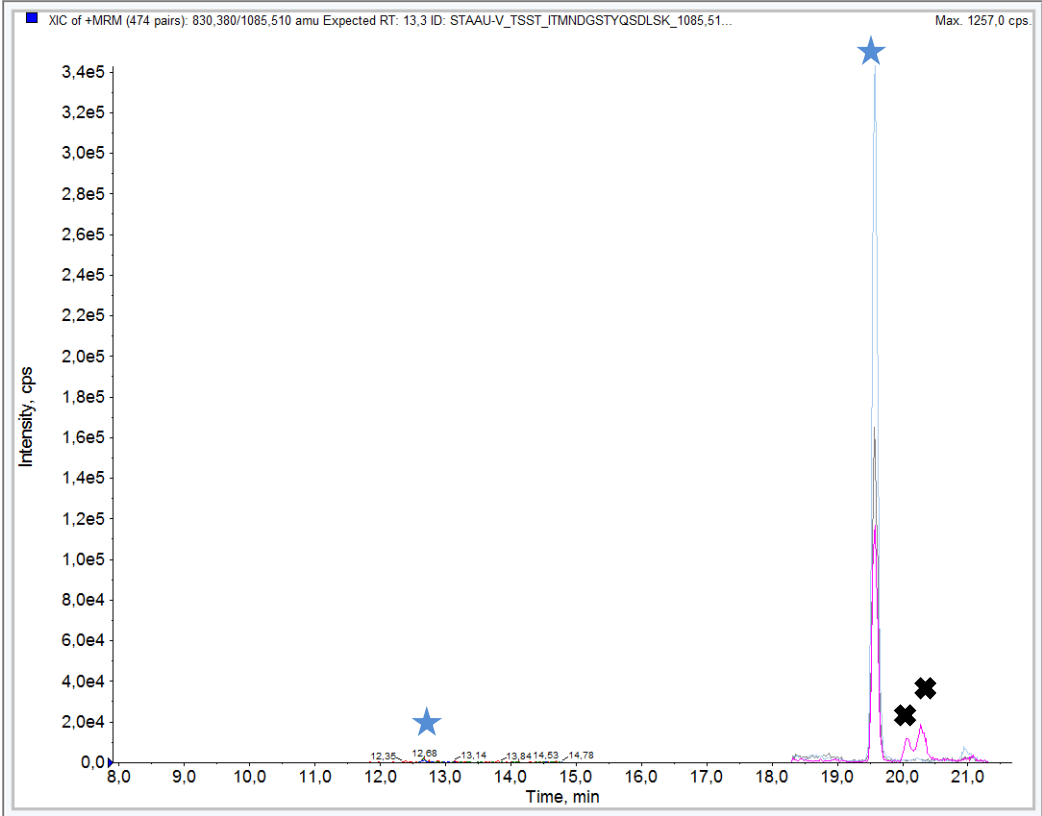

F - Total extracted ion chromatogram

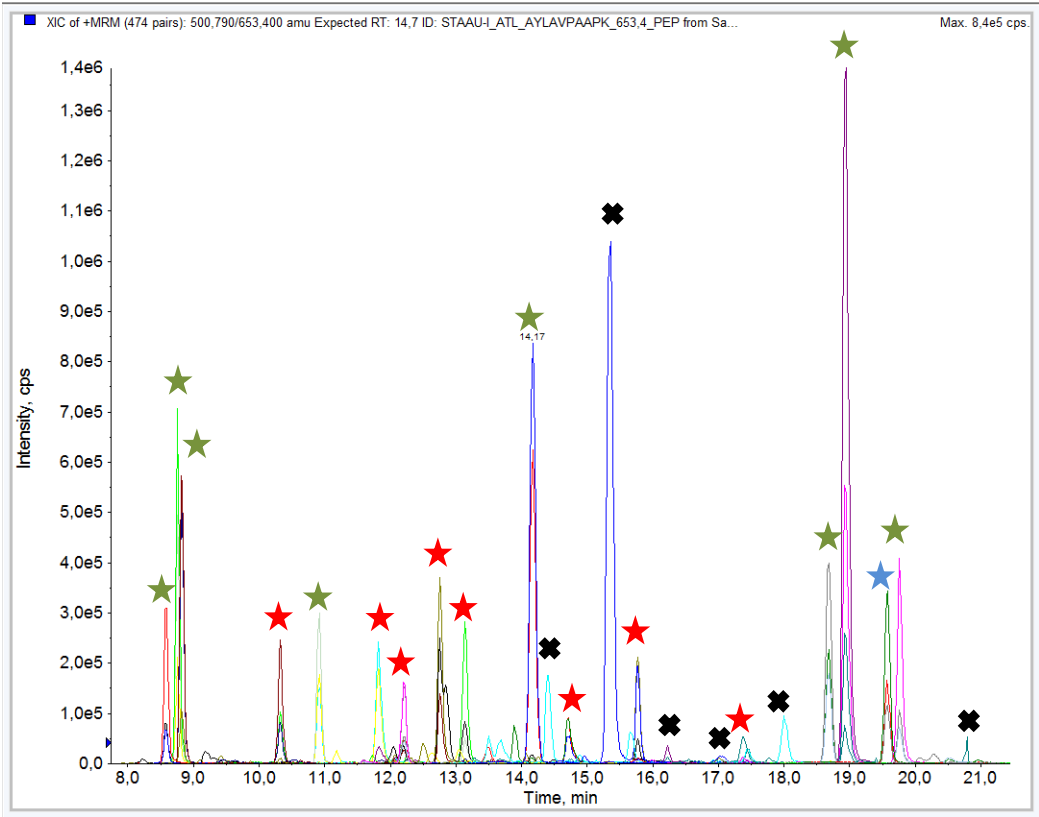

**Supplementary Figure 5:** Screenshot of Strain\_078, analysed in blind conditions, and identified as *Staphylococcus aureus*, expressing Penicillin Binding Protein 2c (PBP2c) but neither Penicillin Binding Protein 2a (PBP2a), nor Panton-Valentine Leukocidin (PVL), nor Toxic Shock Syndrome Toxin 1 (TSST-1).

Peptides used for strain identification, resistance markers and virulence factors are identified by green, red and blue stars, respectively. Black crosses show isolated transitions.

A - Extracted ion chromatogram of peptides used for identification

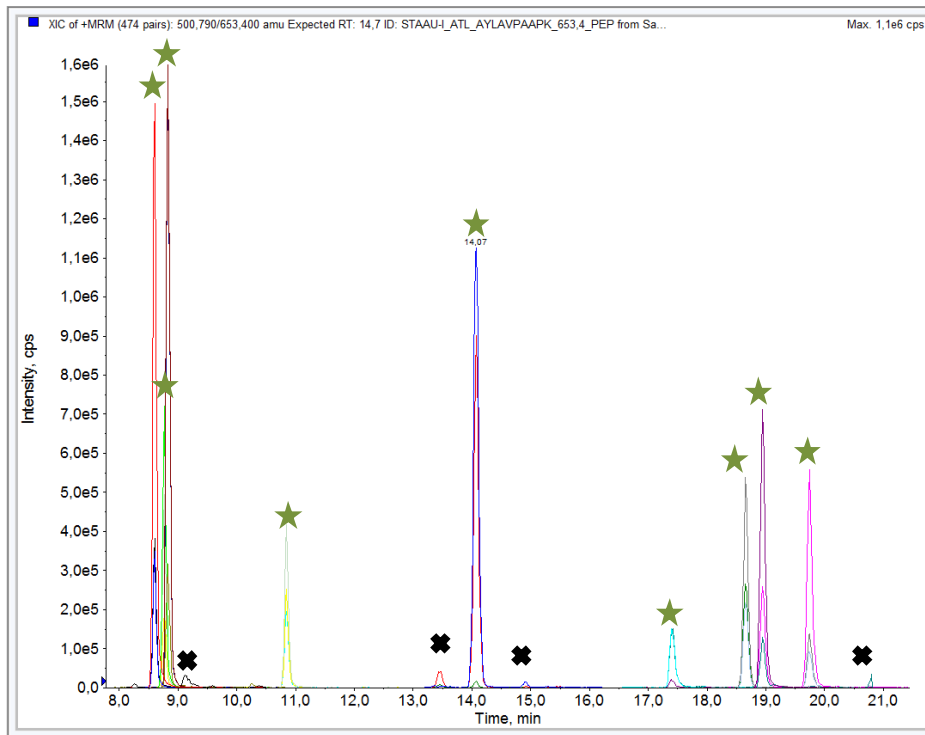

B - Extracted Ion chromatogram of peptides used for Penicillin Binding Protein 2a (PBP2a) detection.

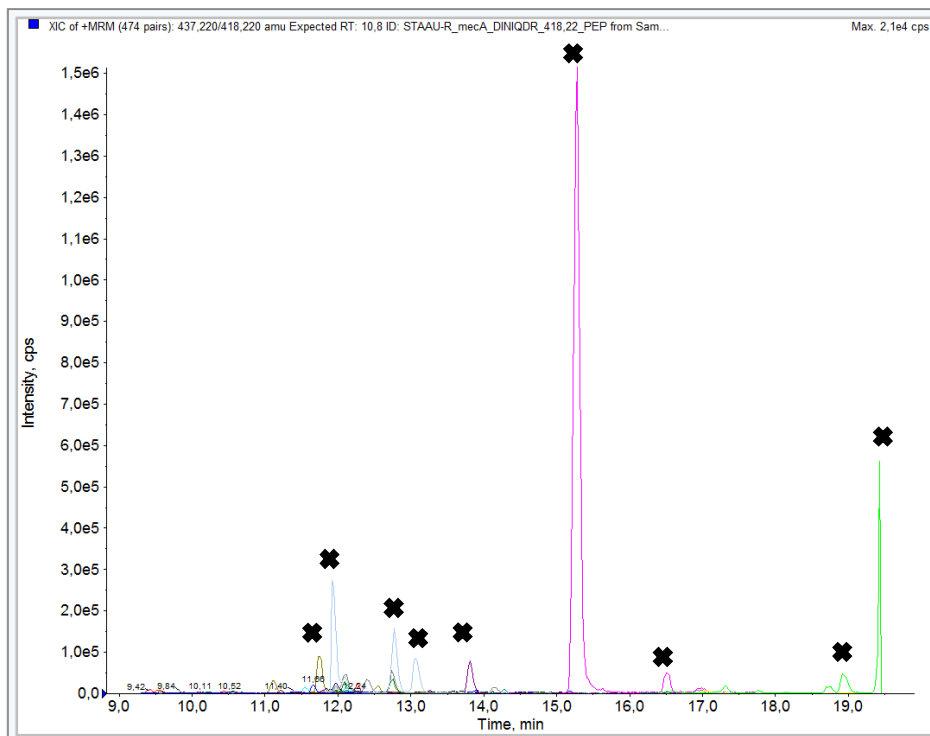

C - Extracted Ion chromatogram of peptides used for Penicillin Binding Protein 2c (PBP2c) detection.

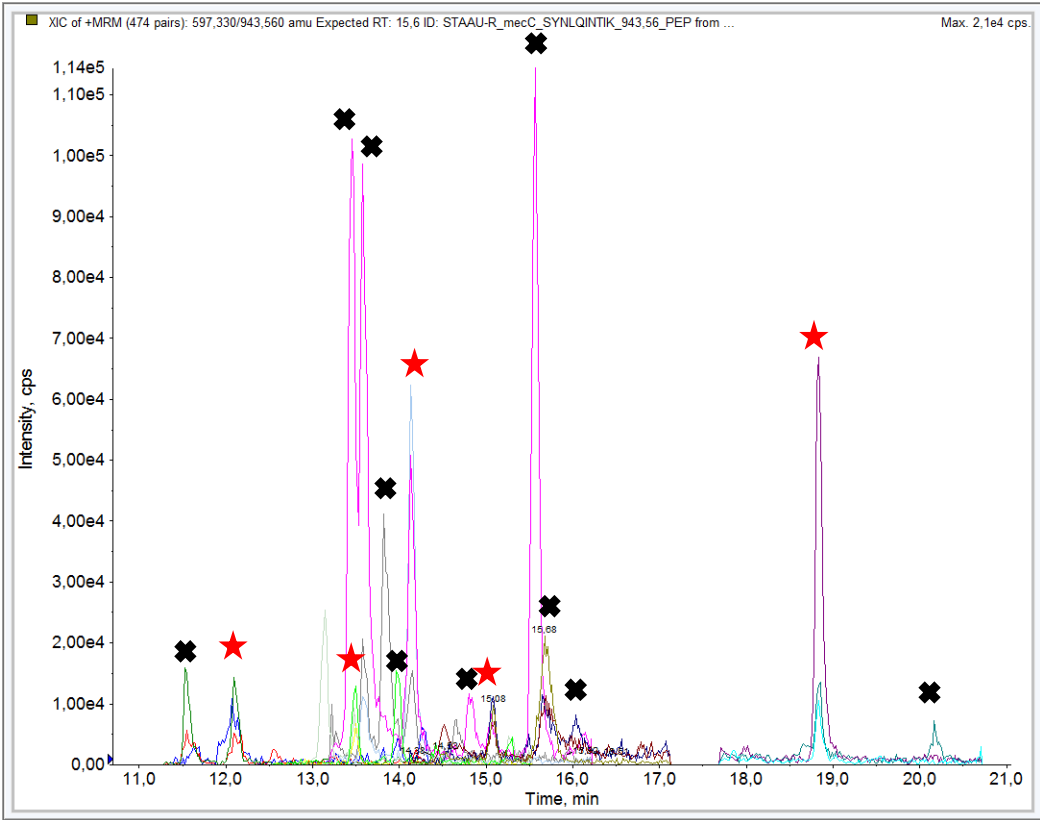

D - Extracted ion chromatogram of peptide used for Panton-Valentine Leukocidin (PVL) detection.

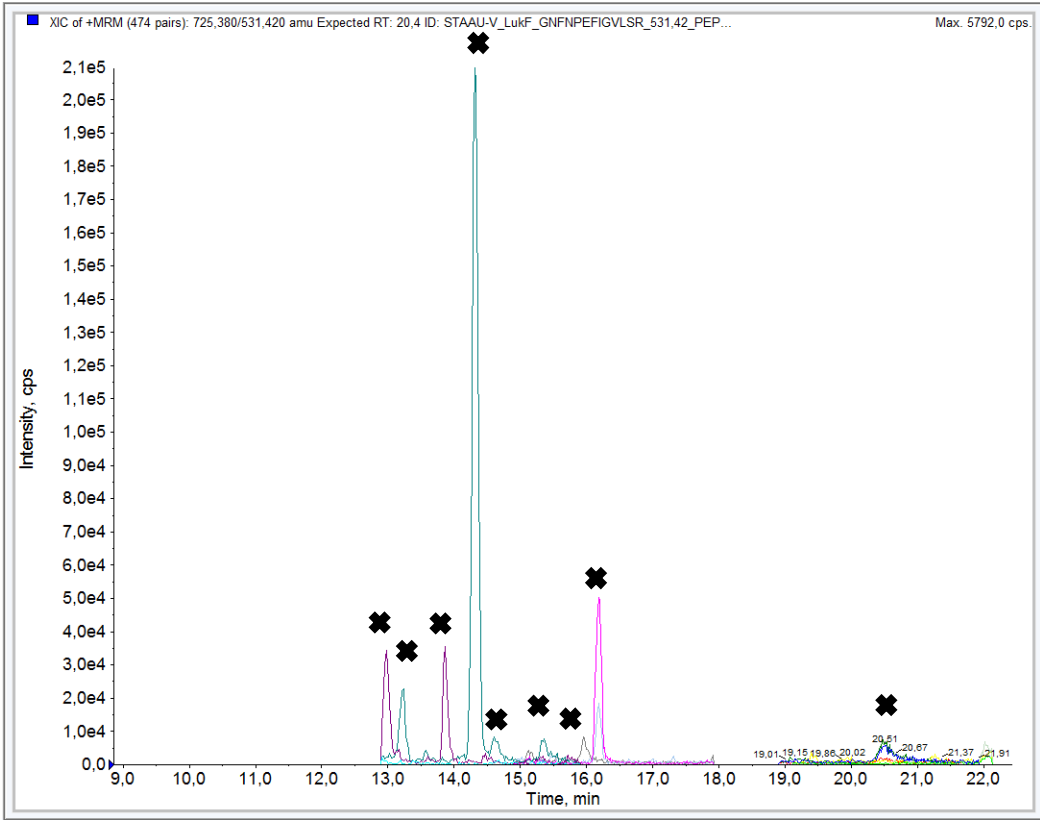

E - Extracted ion chromatogram of peptide used for Toxic Shock Syndrome Toxin 1 (TSST-1) detection.

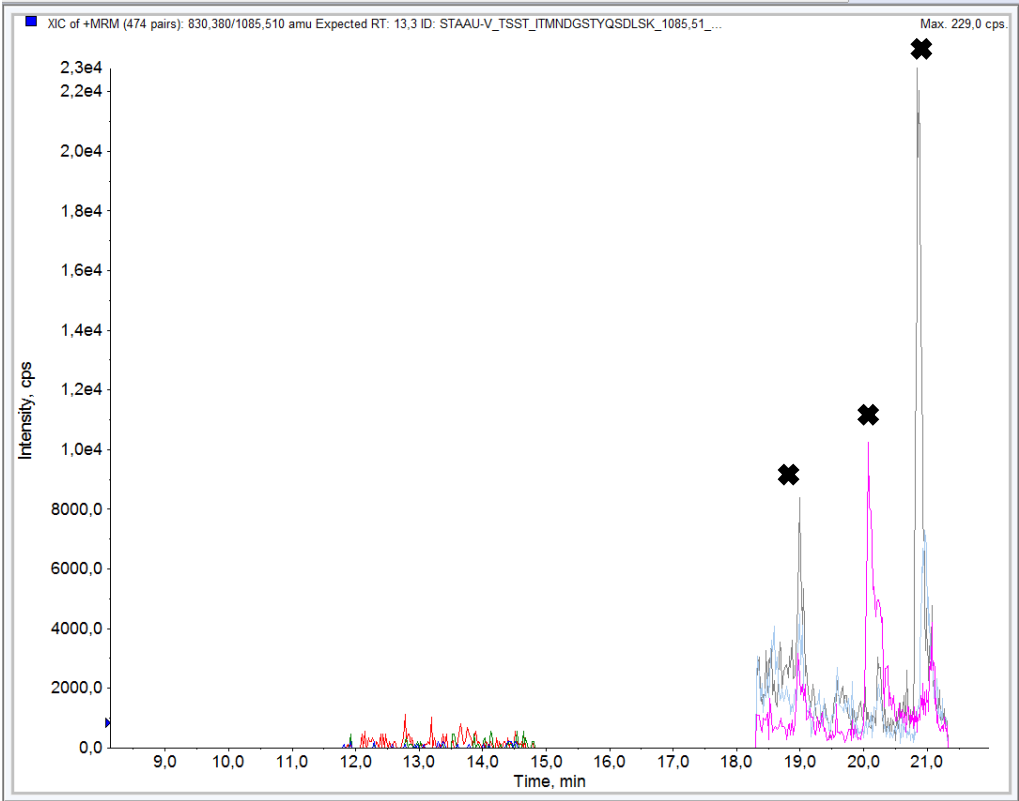

F - Total extracted ion chromatogram.

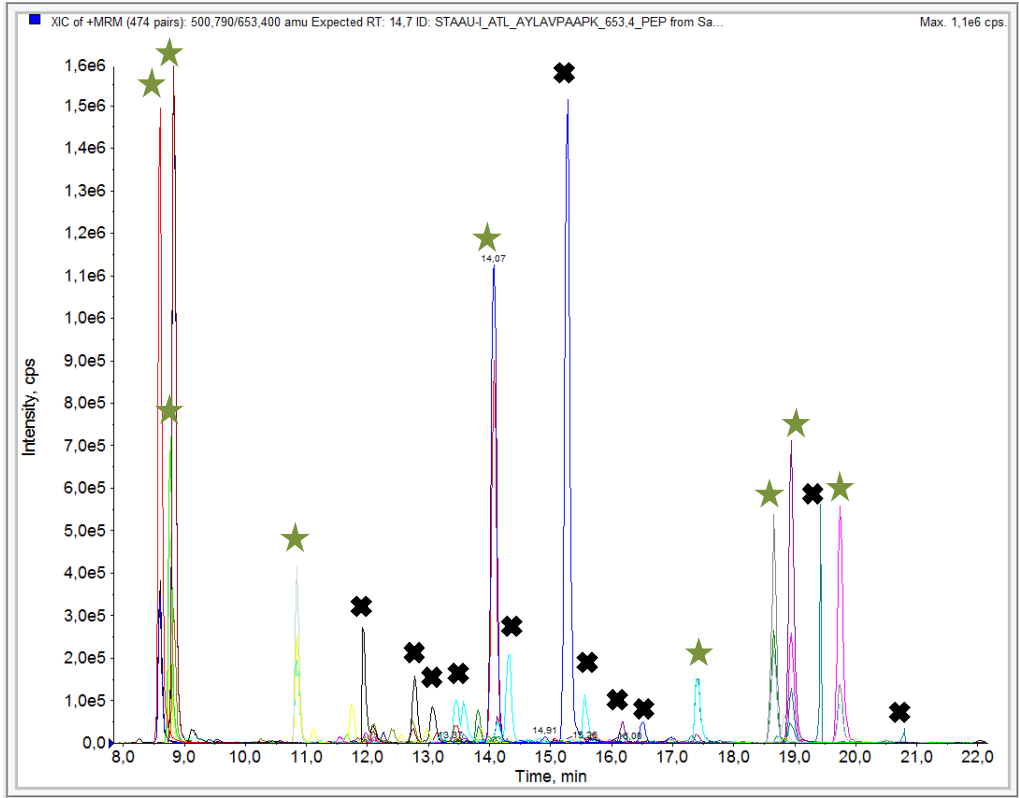

**Supplementary Figure 6:** Frequency distribution of the coefficient of variation from the normalised area ratios across the training set

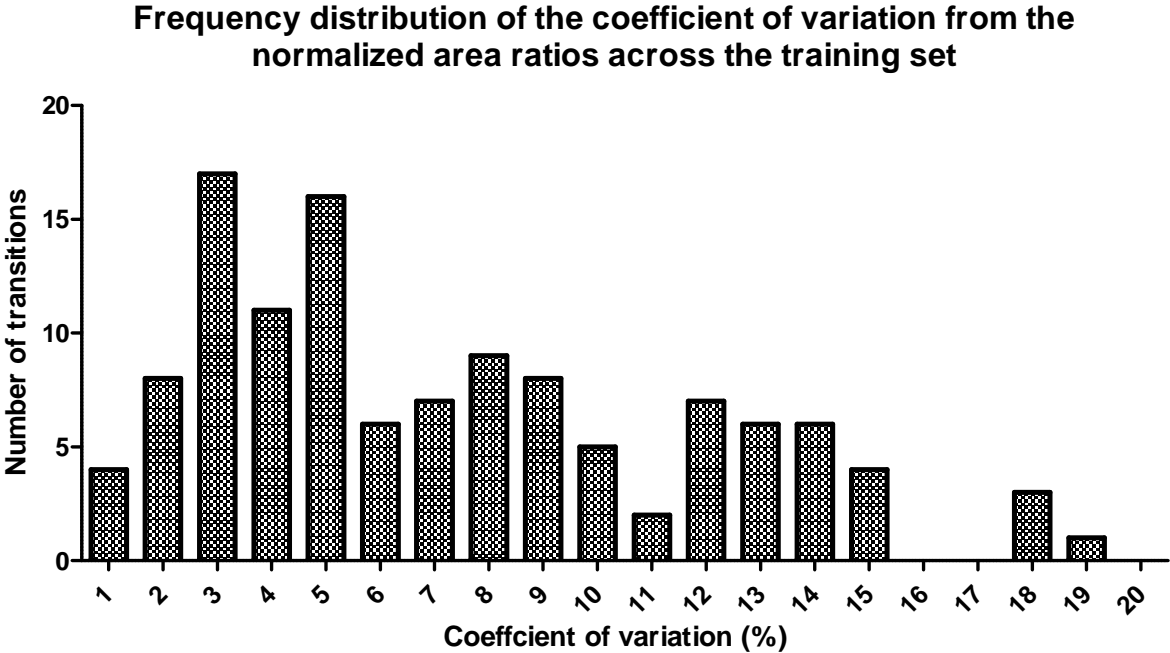

**Supplementary Figure 7:** feature detection in Strain\_093

**Supplementary Figure 7a:** *S. aureus* identification based on peptide ratio conservation.

Nine *S. aureus* specific I-peptides were selected for identification. Each I-peptide was included when transitions retention time standard deviation were lower than 0.03 and when transitions areas were higher than 4000. If one of these criteria was not respected for one transition, the I-peptide was considered as undetected. For each peptide, 3 transitions (T1, T2 and T3) were used. For each transition a proportion can be calculated in every sample.

$$\text{Area ratio (T1)} = \frac{\text{T1 area}}{(\text{T1 area} + \text{T2 area} + \text{T3 area})}$$

For each transition, an average area was calculated based on positive samples from the train set, which allowed to determine an average ratio for each transition. This average ratio was compared to an unknown sample ratio. The slope and the  $r^2$  were calculated from the resulting linear regression curve. Strain\_093 (test set) gave the following graph:

### ***S. aureus* identification - Strain\_093**

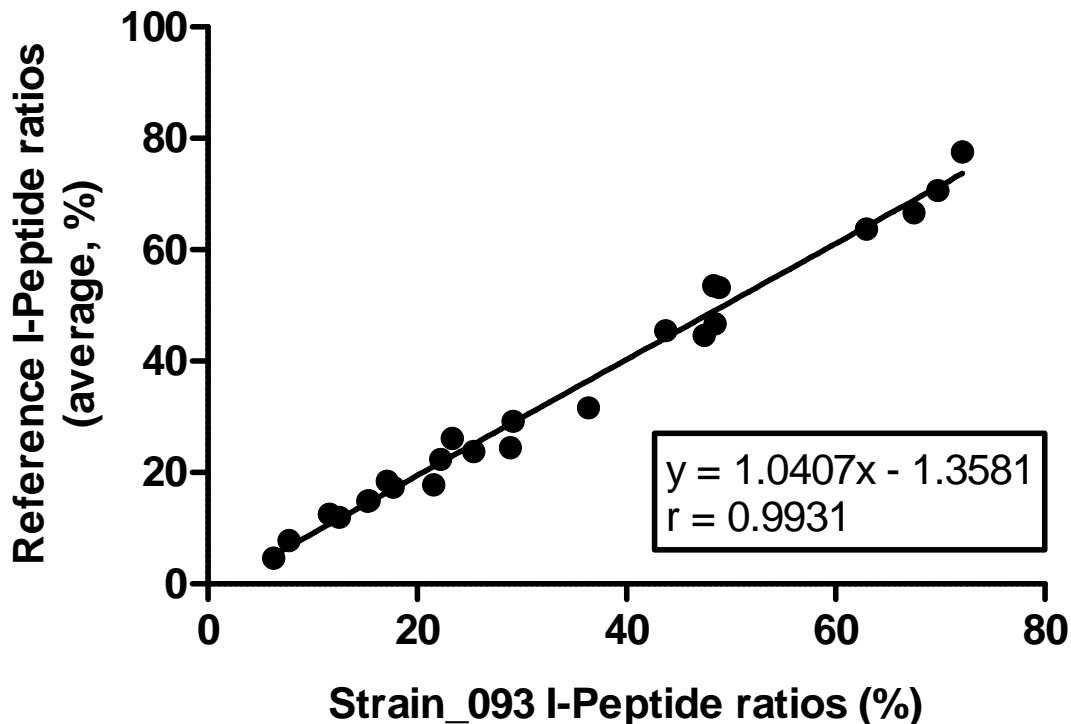

**Supplementary Figure 7b:** Penicillin Binding Protein 2a (PBP2a) detection based on peptide ratio conservation.

Transition areas were compared with average transition area obtained with positive samples from the train set. The slope and the  $r^2$  were calculated from the resulting linear regression curve. Strain\_093 gave the following graph:

### PBP2a detection - Strain\_093

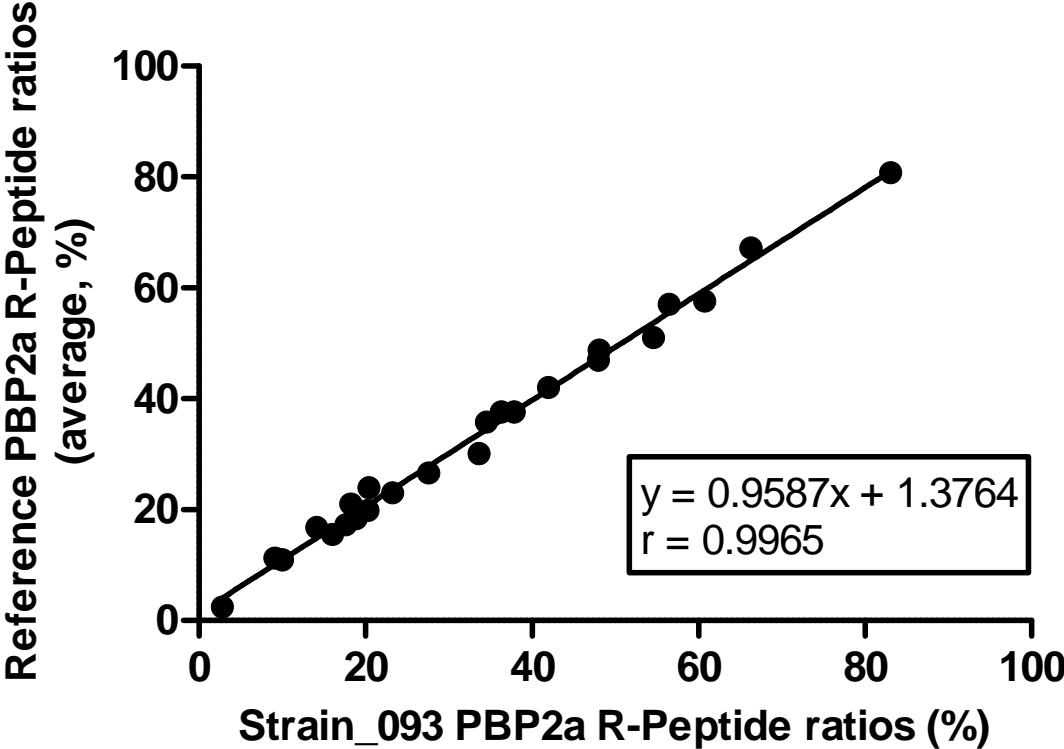



**Supplementary Figure 7c:** Panton-Valentine Leukocidin (PVL) detection based on peptide ratio conservation.

Transition areas were compared with average transition area obtained with positive samples from the train set. The slope and the  $r^2$  were calculated from the resulting linear regression curve. Strain\_093 gave the following graph:

### PVL detection - Strain\_093

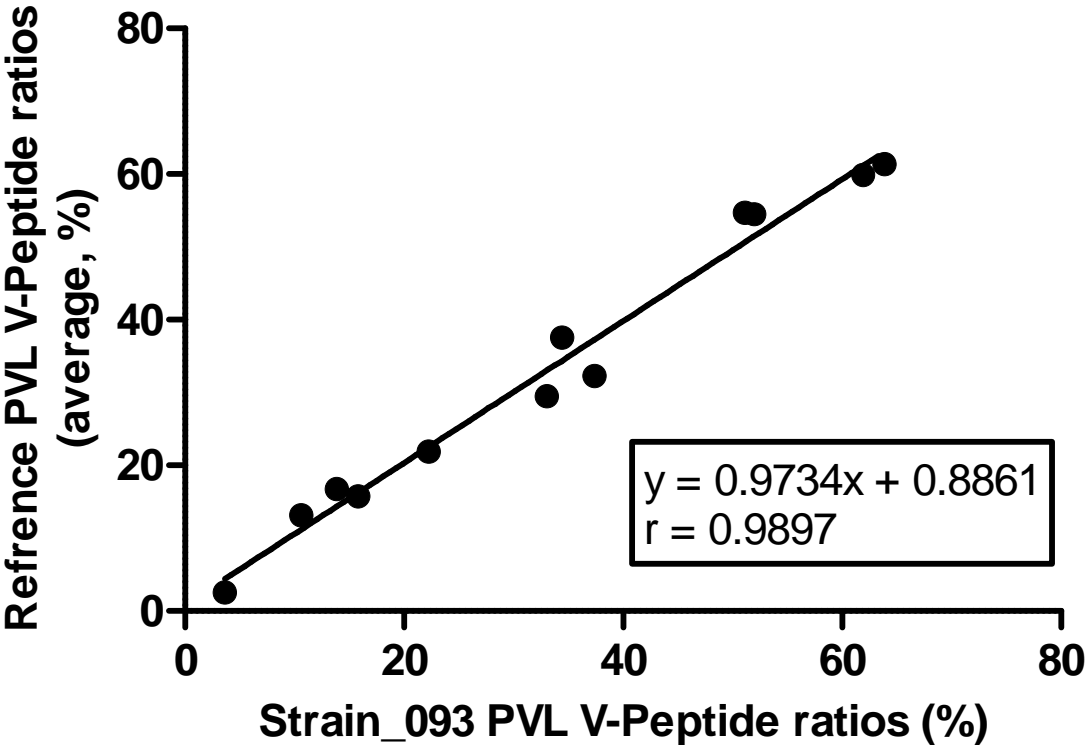

**Supplementary Figure 8:** Slope and the Pearson product-moment correlation coefficients ( $r$ ) from the linear regression across the data sets

**Supplementary Figure 8a:** *S. aureus* identification

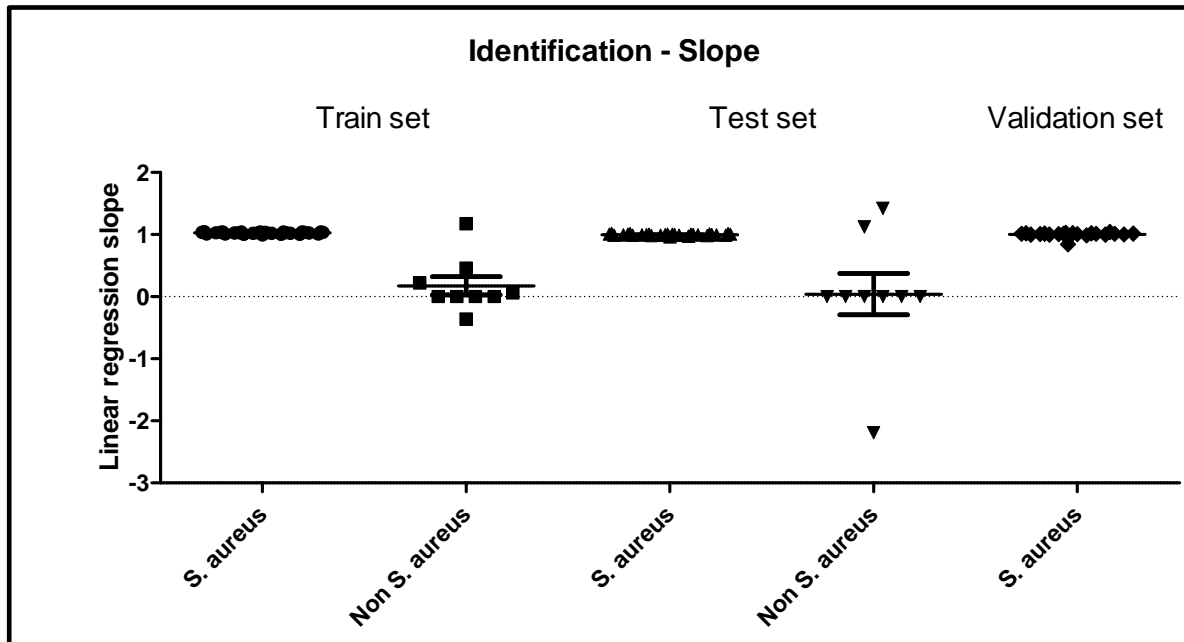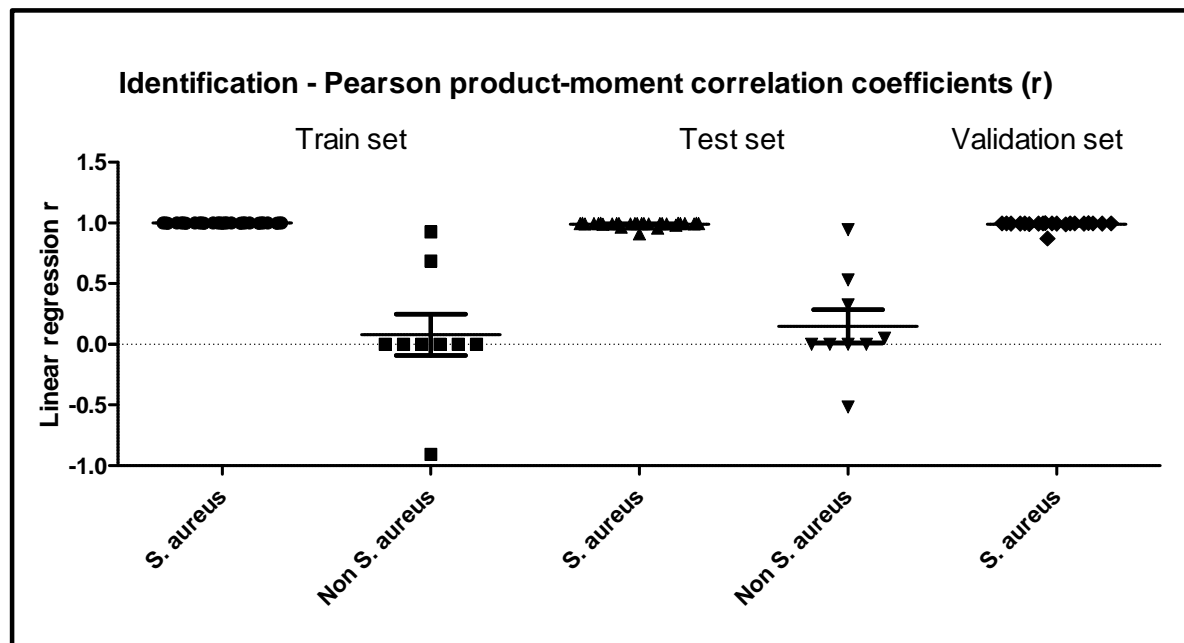

Supplementary Figure 8b: Penicillin Binding Protein 2c (PBP2c) detection.

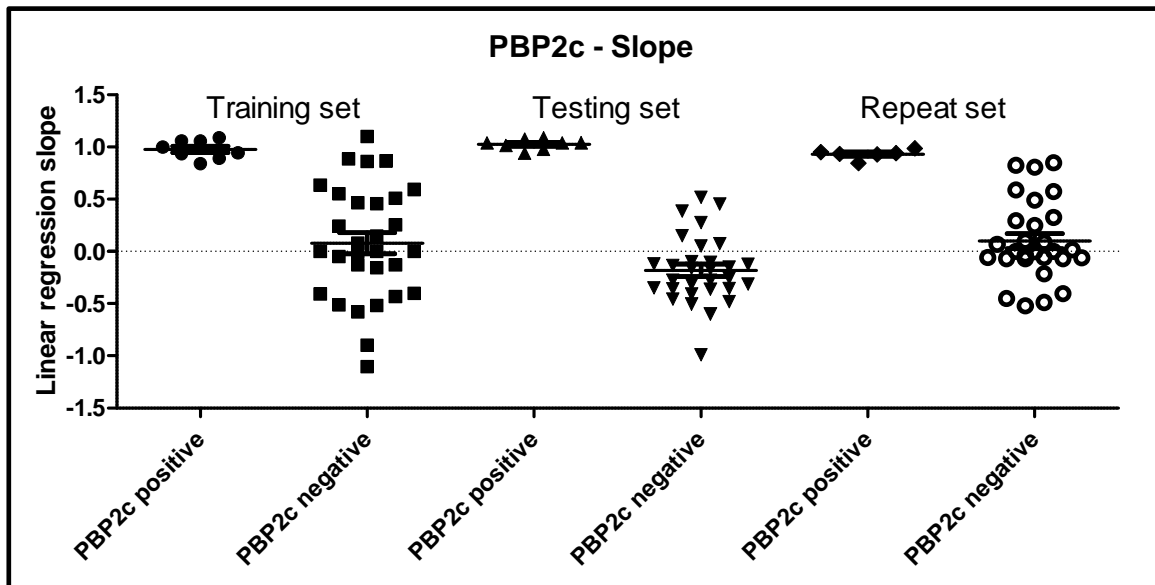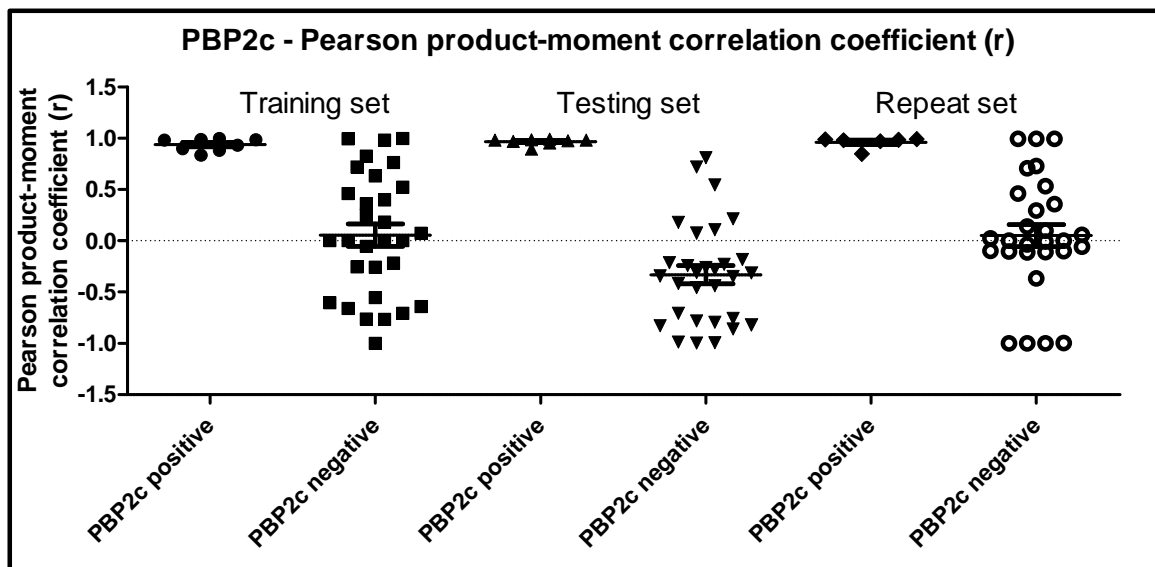

Peptide FQITTSPGSTQK is shared by PBP2a and PBP2c encoded, respectively, by the *mecA* and *mecC* genes. This peptide was used to detect both proteins. When PBP2a was produced, FQITTSPGSTQK detection led to both a slope and a Pearson product-moment correlation coefficient ( $r$ ) superior to 0.7, but the total number of detected peptides was never superior than 2. The latest rule enabled a clear distinction between PBP2c and PBP2a production.

Supplementary Figure 8c: Panton-Valentine Leukocidin (PVL) detection.

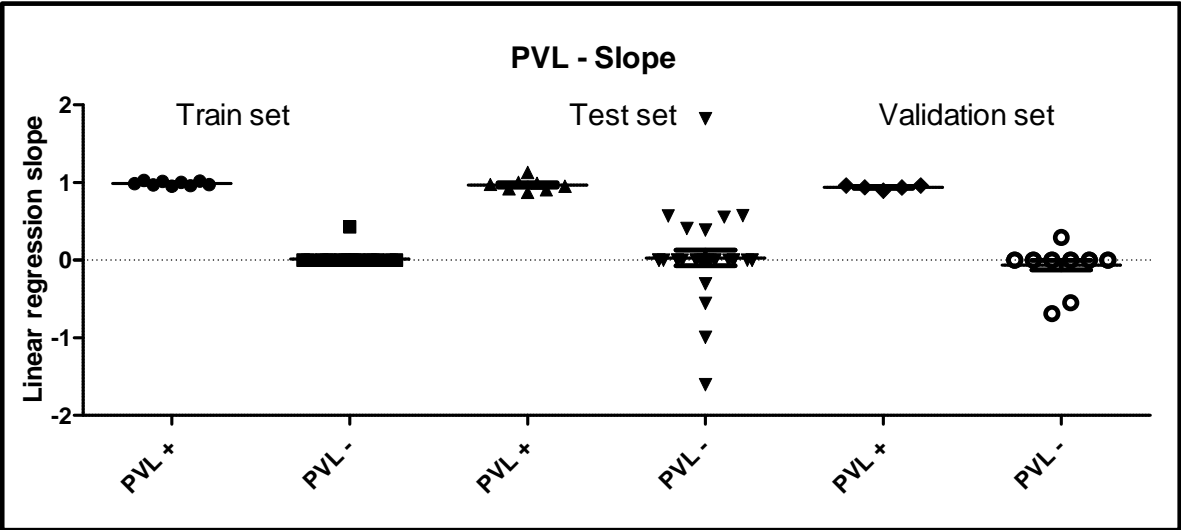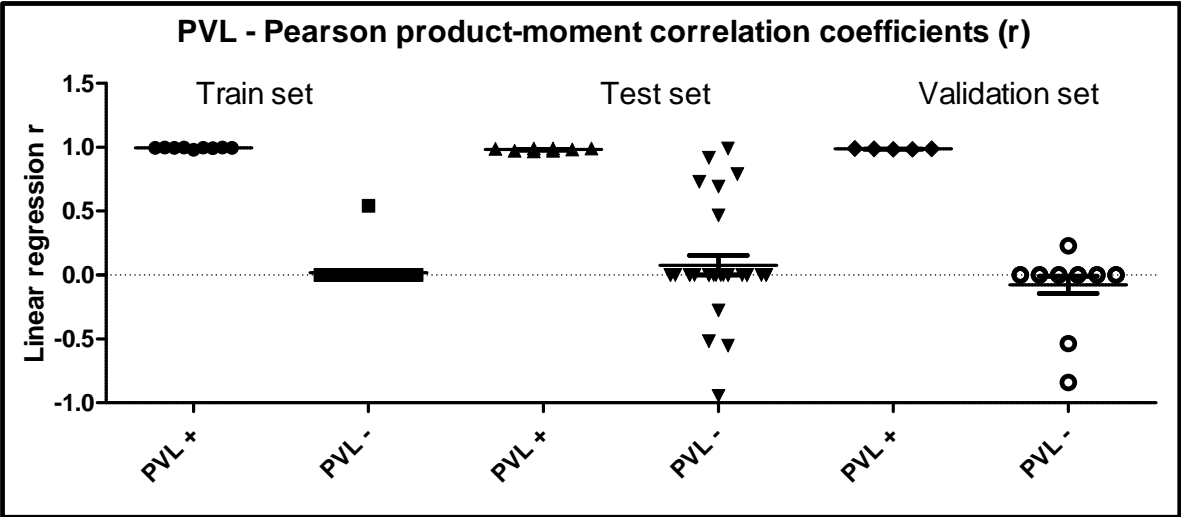

## References

1. Ito, T. *et al.* Guidelines for reporting novel *mecA* gene homologues. *Antimicrob. Agents Chemother.* **56**, 4997-4999 (2012).
2. Tristan, A. *et al.* Global distribution of Panton-Valentine leukocidin--positive methicillin-resistant *Staphylococcus aureus*, 2006. *Emerg. Infect. Dis.* **13**, 594-600 (2007).
3. Perret, M. *et al.* Cross-talk between *Staphylococcus aureus* leukocidins-intoxicated macrophages and lung epithelial cells triggers chemokine secretion in an inflammasome-dependent manner. *Cell Microbiol.* **14**, 1019-1036 (2012).
4. Rasigade, J.P. *et al.* Global distribution and evolution of Panton-Valentine leukocidin-positive methicillin-susceptible *Staphylococcus aureus*, 1981-2007. *J. Infect. Dis.* **201**, 1589-1597 (2010).
5. Dauwalder, O. *et al.* Epidemiology of invasive methicillin-resistant *Staphylococcus aureus* clones collected in France in 2006 and 2007. *J. Clin. Microbiol.* **46**, 3454-3458 (2008).
6. Blanco, R. *et al.* Molecular epidemiology of Panton-Valentine leukocidin-positive *Staphylococcus aureus* in Spain: emergence of the USA300 clone in an autochthonous population. *J. Clin. Microbiol.* **49**, 433-436 (2011).
7. Monecke, S., Luedicke, C., Slickers, P. & Ehricht, R. Molecular epidemiology of *Staphylococcus aureus* in asymptomatic carriers. *Eur. J. Clin. Microbiol. Infect. Dis.* **28**, 1159-1165 (2009).
8. Chroboczek, T. *et al.* Clonal complex 398 methicillin susceptible *Staphylococcus aureus*: a frequent unspecialized human pathogen with specific phenotypic and genotypic characteristics. *PLoS. One.* **8**, e68462-(2013).
9. Laurent, F. *et al.* MRSA harboring *mecA* variant gene *mecC*, France. *Emerg. Infect. Dis.* **18**, 1465-1467 (2012).
10. Oliveira, D.C., Tomasz, A. & De Lencastre, H. Secrets of success of a human pathogen: molecular evolution of pandemic clones of methicillin-resistant *Staphylococcus aureus*. *Lancet Infect. Dis.* **2**, 180-189 (2002).
11. Grundmann, H. *et al.* Geographic distribution of *Staphylococcus aureus* causing invasive infections in Europe: a molecular-epidemiological analysis. *PLoS. Med.* **7**, e1000215-(2010).
12. Wannet, W.J. *et al.* Widespread dissemination in The Netherlands of the epidemic berlin methicillin-resistant *Staphylococcus aureus* clone with low-level resistance to oxacillin. *J. Clin. Microbiol.* **42**, 3077-3082 (2004).
13. Enright, M.C., Day, N.P., Davies, C.E., Peacock, S.J. & Spratt, B.G. Multilocus sequence typing for characterization of methicillin-resistant and methicillin-susceptible clones of *Staphylococcus aureus*. *J. Clin. Microbiol.* **38**, 1008-1015 (2000).

14. Harmsen, D. *et al.* Typing of methicillin-resistant *Staphylococcus aureus* in a university hospital setting by using novel software for spa repeat determination and database management. *J. Clin. Microbiol.* **41**, 5442-5448 (2003).
